# Supplementary material for: The CNS Myelin Proteome: Deep Profile and Persistence After Post-mortem Delay
Source: Front Cell Neurosci. 2020 Aug 19;14:239. doi: 10.3389/fncel.2020.00239 (PMC7466725; doi:10.3389/fncel.2020.00239)
Supplement: TABLE S2 — Label-free quantification of proteins in CNS myelin purified from mouse brains without (Ctrl) and after 6 h post-mortem delay (PMD6h) by DRE-UDMSE. Related to Figure 4. (Sheet 1) Dataset. [file Data_Sheet_2.XLSX]

## Sheet: Table legend
Supplemental Table S2. Label-free quantification of proteins in CNS myelin purified from mouse brains without (Ctrl) and with 6h post-portem delay (PMD6h) by DRE-UDMSe
Identification and quantification data of proteins detected in myelin by DRE-UDMSe. For each of the two conditions, tryptic peptides derived from two technical replicates (replicate digestion) per each of three biological replicates were analyzed by LC-MS (12 runs in total). Proteins (FDR < 1%; 2 peptides/protein) and peptides (FDR < 1%; ≥7 amino acids) were identified by database search against …
Sheet 1	Ctrl-PMD6h diff. DRE-UDMSe	Differential LC-MS analysis of control vs. post-mortem delayed myelin by DRE-UDMSe
Column descriptions
A	gene name	Gene name as extracted from description (column B)
B	description	Protein description as parsed from UniprotKB/SwissProt mouse source database
C	IEP	Calculated isoelectric point
D	mw	Calculated molecular weight (Da)
E	max score	Maximum identification score provided by PLGS database searching
F	accession	Database accession number as parsed from source database
G	reported peptides	Number of peptides after ISOQuant processing
H	sequence coverage	Sequence coverage of the protein
I	FDR level	FDR rate at protein level
J	entry	Protein entry as parsed from source database
K-V	Ctrl.1 to PMD6h.6	Relative protein abundance in ppm for each replicate
W,X	AVERAGE.Ctrl, AVERAGE.PMD6h	Average relative protein abundance in ppm for Ctrl and PMD6h group
Y	Sparklines	Sparklines displaying the abundance of proteins for each replicate
Z	logFC PMD6h/Ctrl	"log2" of fold change as calculated with the R data analysis pipeline (see Materials & Methods for details)
AA	minuslog10q.mod	"-log10" of q-value
AB	q.mod	q-value as calculated with the R data analysis pipeline (see Materials & Methods for details)
AC	zdist	Length of the segment connecting the two points (0,0) and (x,y) with x = log2(fold change) and y= -log10(q-value) (Euclidian distance)

## Sheet: 1 Ctrl-PMD6h diff. DRE-UDMSe
gene name	description	IEP	mw	max.score	accession	reported.peptides	sequence.coverage	FDR.level	entry	Ctrl.1	Ctrl.2	Ctrl.3	Ctrl.4	Ctrl.5	Ctrl.6	PMD6h.1	PMD6h.2	PMD6h.3	PMD6h.4	PMD6h.5	PMD6h.6	AVERAGE.Ctrl	AVERAGE.PMD6h	Sparklines	logFC PMD6h/Ctrl	minuslog10q.mod	q.mod	zdist
Atp6v1c1	V-type proton ATPase subunit C 1 OS=Mus musculus OX=10090 GN=Atp6v1c1 PE=1 SV=4	7.33	44058.7	4023.63	Q9Z1G3	24	66.75	0	VATC1_MOUSE	750.69	745.7	760.35	691.49	602.52	607.32	270.33	265.96	236.64	234.77	272.94	282.03	693.01	260.45		-1.40872	6.44897	3.55654e-07	6.60104
Cnrip1	CB1 cannabinoid receptor-interacting protein 1 OS=Mus musculus OX=10090 GN=Cnrip1 PE=1 SV=1	8.18	18726.5	4532.75	Q5M8N0	7	56.71	0	CNRP1_MOUSE	387.2	370.3	244.23	410.55	267.96	314.64	95.95	108.62	83.16	73.8	91.54	108	332.48	93.51		-1.81741	6.04387	9.03925e-07	6.31121
Syp	Synaptophysin OS=Mus musculus OX=10090 GN=Syp PE=1 SV=2	4.63	34309.8	762.83	Q62277	2	7.32	0	SYPH_MOUSE	114.45	95.53	107.5	83.84	84.55	86.54	213.74	214.7	196.74	209.86	220.85	238.45	95.4	215.73		1.18542	5.68719	2.055e-06	5.80942
Snap91	Clathrin coat assembly protein AP180 OS=Mus musculus OX=10090 GN=Snap91 PE=1 SV=1	4.53	92136.7	558.32	Q61548	5	6.55	0	AP180_MOUSE	276.31	182.39	261.06	165.61	180.51	178.93	494.91	663.46	506.2	555.79	629.4	702.05	207.47	591.97		1.53	5.31905	4.79675e-06	5.53473
Tubb5	Tubulin beta-5 chain OS=Mus musculus OX=10090 GN=Tubb5 PE=1 SV=1	4.59	50127.2	17801.9	P99024	22	59.23	0	TBB5_MOUSE	671.93	900.81	783.03	581.6	635.65	515.61	2608.52	3553.35	1735.01	1987.82	2058.73	1923.17	681.44	2311.1		1.74204	5.23482	5.82344e-06	5.51707
Camk2g	Calcium/calmodulin-dependent protein kinase type II subunit gamma OS=Mus musculus OX=10090 GN=Camk2g PE=1 SV=1	7.32	60291.3	1455.08	Q923T9	9	20.79	0	KCC2G_MOUSE	75.55	70.19	87.96	76.41	59.8	64.18	156.56	208.06	150.58	155.74	153.65	164.62	72.35	164.87		1.19036	5.31905	4.79675e-06	5.45062
Prkaca	cAMP-dependent protein kinase catalytic subunit alpha OS=Mus musculus OX=10090 GN=Prkaca PE=1 SV=3	9.23	40684.7	375.94	P05132	3	8.55	0	KAPCA_MOUSE	219.61	136.81	235.62	148.78	143.7	135.33	53.46	62.29	52.91	51.5	57.26	NA	169.98	55.48		-1.57936	5.12098	7.56867e-06	5.35899
Camk2b	Calcium/calmodulin-dependent protein kinase type II subunit beta OS=Mus musculus OX=10090 GN=Camk2b PE=1 SV=2	6.93	61202.3	1913.85	P28652	14	35.98	0	KCC2B_MOUSE	205.12	174.98	205.29	166.43	175.13	181.18	367.12	389.44	316.69	337.65	340.7	401.88	184.69	358.91		0.958239	5.20518	6.23479e-06	5.29265
Tubb4b	Tubulin beta-4B chain OS=Mus musculus OX=10090 GN=Tubb4b PE=1 SV=1	4.6	50287.3	20253.2	P68372	23	65.17	0	TBB4B_MOUSE	1688.01	2176.11	2095.44	1563.93	1600.63	1623.49	4926.07	5627.86	4146.38	3480.41	3644.76	3553.73	1791.27	4229.87		1.22867	4.75755	1.74762e-05	4.91365
Camk2a	Calcium/calmodulin-dependent protein kinase type II subunit alpha OS=Mus musculus OX=10090 GN=Camk2a PE=1 SV=2	6.66	54685.1	2565.99	P11798	19	45.4	0	KCC2A_MOUSE	577.16	487.84	511.36	460.29	450.89	452.13	886.17	926.93	758.69	826.59	808.68	884.05	489.94	848.52		0.794775	4.47537	3.34681e-05	4.54539
Vamp1	Vesicle-associated membrane protein 1 OS=Mus musculus OX=10090 GN=Vamp1 PE=1 SV=1	6.62	13004	931.86	Q62442	3	33.9	0	VAMP1_MOUSE	10.61	13.07	6.56	7.04	10.93	8.41	20.16	26.09	19.26	25.42	20.77	24.34	9.44	22.68		1.29814	4.34785	4.48904e-05	4.5375
Tubb2a	Tubulin beta-2A chain OS=Mus musculus OX=10090 GN=Tubb2a PE=1 SV=1	4.59	50306.3	15629.8	Q7TMM9	22	59.1	0	TBB2A_MOUSE	447.64	573.96	555.07	413.62	417.58	365.17	1328.44	1712.59	853.14	960.21	1035.62	1058.13	462.18	1158.02		1.30448	4.34459	4.52284e-05	4.5362
Tubb3	Tubulin beta-3 chain OS=Mus musculus OX=10090 GN=Tubb3 PE=1 SV=1	4.63	50875	9681.9	Q9ERD7	22	66.22	0	TBB3_MOUSE	569.74	722.44	622.89	512.55	512.48	464.7	1573.81	1867.78	1081.65	1178.15	1134.35	1095.62	567.47	1321.9		1.20281	4.34459	4.52284e-05	4.50802
Atp2a2	Sarcoplasmic/endoplasmic reticulum calcium ATPase 2 OS=Mus musculus OX=10090 GN=Atp2a2 PE=1 SV=2	5.06	116512	280.05	O55143	6	7.18	0	AT2A2_MOUSE	299.65	287.59	320.56	295.41	256.91	275.7	503.83	537.48	425.79	424.68	493.23	537.78	289.3	487.13		0.748329	4.18522	6.52802e-05	4.25159
Epb41l3	Band 4.1-like protein 3 OS=Mus musculus OX=10090 GN=Epb41l3 PE=1 SV=1	5.04	103794	706.51	Q9WV92	23	32.94	0	E41L3_MOUSE	670.03	688.26	754.1	591.13	554.75	538.59	354.94	405.73	302.28	293.75	333.11	391.1	632.81	346.82		-0.867388	4.09247	8.08225e-05	4.18338
Syt2	Synaptotagmin-2 OS=Mus musculus OX=10090 GN=Syt2 PE=1 SV=1	8	47776	381.33	P46097	6	16.82	0	SYT2_MOUSE	51.34	17.83	19.69	30.22	38.1	14.78	82.73	119.19	75.35	88.38	80.46	67.78	28.66	85.65		1.69821	3.63945	0.000229376	4.01616
Pip4k2a	Phosphatidylinositol 5-phosphate 4-kinase type-2 alpha OS=Mus musculus OX=10090 GN=Pip4k2a PE=1 SV=1	6.57	46379.7	662.76	O70172	8	24.2	0	PI42A_MOUSE	193.06	189.5	198.33	188.16	158.17	172.08	110.94	140.57	103.08	102.78	99.19	107.52	183.22	110.68		-0.733067	3.81997	0.000151366	3.88967
Syt1	Synaptotagmin-1 OS=Mus musculus OX=10090 GN=Syt1 PE=1 SV=1	8.82	47760.2	948.41	P46096	13	35.63	0	SYT1_MOUSE	287.84	198.86	233.46	185.33	214.8	226.82	402.52	408.63	355.51	334.98	412.29	374.78	224.52	381.45		0.774782	3.79197	0.000161446	3.87032
Ndufa5	NADH dehydrogenase [ubiquinone] 1 alpha subcomplex subunit 5 OS=Mus musculus OX=10090 GN=Ndufa5 PE=1 SV=3	8.57	13416.8	1549.35	Q9CPP6	3	27.59	0	NDUA5_MOUSE	47.23	56.07	35.71	42.41	40.12	42.13	79.82	77.99	67.31	72.9	77.05	106.35	43.94	80.24		0.867748	3.71674	0.000191981	3.81669
Ndrg2	Protein NDRG2 OS=Mus musculus OX=10090 GN=Ndrg2 PE=1 SV=1	5.09	41131.5	354.59	Q9QYG0	4	12.13	0	NDRG2_MOUSE	NA	42.83	NA	52.98	41.46	NA	112.63	140.07	83.66	91.17	94.97	105.13	45.76	104.61		1.18078	3.48563	0.000326867	3.6802
Prkca	Protein kinase C alpha type OS=Mus musculus OX=10090 GN=Prkca PE=1 SV=3	6.76	77992.6	696.48	P20444	6	12.35	0	KPCA_MOUSE	482.93	486.58	439.54	405.01	310.1	386.97	634.36	671.06	722.62	661.32	692.98	795.63	418.52	696.33		0.746974	3.51399	0.000306201	3.59251
Tubal3	Tubulin alpha chain-like 3 OS=Mus musculus OX=10090 GN=Tubal3 PE=2 SV=2	5.26	50729.6	1109.1	Q3UX10	4	10.31	0	TBAL3_MOUSE	95.02	96.81	78.83	77.24	81.12	82.36	139.43	211.75	115.08	146.05	162.61	143.3	85.23	153.04		0.824924	3.48563	0.000326867	3.58191
Tuba8	Tubulin alpha-8 chain OS=Mus musculus OX=10090 GN=Tuba8 PE=1 SV=1	4.8	50735.9	11772.6	Q9JJZ2	12	37.64	0	TBA8_MOUSE	5575.75	6860.39	6618.63	6856.32	5042.87	4671.29	9500.78	11685.9	8966.34	10017.5	9158.72	10025.3	5937.54	9892.43		0.747491	3.48563	0.000326867	3.56488
Map2k4	Dual specificity mitogen-activated protein kinase kinase 4 OS=Mus musculus OX=10090 GN=Map2k4 PE=1 SV=2	8.07	44569.9	284.19	P47809	3	11.08	0	MP2K4_MOUSE	157.93	164.89	147.38	144.44	100.33	116.62	62.38	80.82	52.7	76.9	65.76	94.76	138.6	72.22		-0.945144	3.41307	0.000386303	3.54152
Vdac1	Voltage-dependent anion-selective channel protein 1 OS=Mus musculus OX=10090 GN=Vdac1 PE=1 SV=3	8.7	32522.6	10450.5	Q60932	13	60.47	0	VDAC1_MOUSE	2071.68	1915.78	1292.52	1623.91	1211.52	1516.89	2798.83	3581.81	2709.66	2542.3	2546.32	3103.55	1605.38	2880.41		0.859294	3.41307	0.000386303	3.51958
Anxa5	Annexin A5 OS=Mus musculus OX=10090 GN=Anxa5 PE=1 SV=1	4.63	35809.5	781.24	P48036	10	35.11	0	ANXA5_MOUSE	103.6	96.48	92.79	80.78	65.47	75.44	164.57	216.37	133.31	158.44	124.92	150.18	85.76	157.97		0.875479	3.4075	0.000391289	3.51817
Tagln3	Transgelin-3 OS=Mus musculus OX=10090 GN=Tagln3 PE=1 SV=1	7.19	22641.8	1042.61	Q9R1Q8	9	47.24	0	TAGL3_MOUSE	101.6	84.87	103.28	93.01	43.45	52.73	NA	29.83	29.36	30.47	35.62	33.25	79.83	31.71		-1.26151	3.26386	0.000544678	3.49917
Cfl1	Cofilin-1 OS=Mus musculus OX=10090 GN=Cfl1 PE=1 SV=3	8.23	18787.7	9549.01	P18760	10	69.88	0	COF1_MOUSE	242.61	282.33	350.3	240.12	309.18	249.09	418.94	533.93	378.03	478.9	514.04	470.01	278.94	465.64		0.743785	3.41307	0.000386303	3.49318
Gnaz	Guanine nucleotide-binding protein G(z) subunit alpha OS=Mus musculus OX=10090 GN=Gnaz PE=1 SV=4	7.5	41363	648.38	O70443	6	20.85	0	GNAZ_MOUSE	37.57	NA	40.98	34.06	16.93	29.88	67.26	70.8	56.19	64.8	67.38	72.63	31.88	66.51		1.11851	3.26095	0.000548337	3.44745
Atp6v1g2	V-type proton ATPase subunit G 2 OS=Mus musculus OX=10090 GN=Atp6v1g2 PE=1 SV=1	10.89	13708.5	4889.89	Q9WTT4	5	37.29	0	VATG2_MOUSE	103.15	117.53	111.93	74.99	68.19	65.29	25.59	47.47	42.27	32.55	50.55	52.49	90.18	41.82		-1.11244	3.1702	0.000675767	3.35972
Cadm3	Cell adhesion molecule 3 OS=Mus musculus OX=10090 GN=Cadm3 PE=1 SV=1	5.42	43363.6	541.11	Q99N28	5	23.99	0	CADM3_MOUSE	178.27	149.53	125.63	154.52	121.54	131.74	236.28	287.19	199.7	211.86	221.5	242.47	143.54	233.17		0.702994	3.28437	0.000519558	3.35876
Uqcrc2	Cytochrome b-c1 complex subunit 2_ mitochondrial OS=Mus musculus OX=10090 GN=Uqcrc2 PE=1 SV=1	9.71	48292	6717.3	Q9DB77	19	50.77	0	QCR2_MOUSE	1053.02	1109.84	1200.7	1091.64	863.61	1107.4	1619.24	2278.09	1632.87	1616.71	1500.23	1649.36	1071.04	1716.08		0.673303	3.25041	0.000561805	3.31942
Tuba4a	Tubulin alpha-4A chain OS=Mus musculus OX=10090 GN=Tuba4a PE=1 SV=1	4.75	50665.8	17832.5	P68368	21	58.93	0	TBA4A_MOUSE	7612.29	7255.22	7742.37	6410.75	5736.14	6889.65	8178.67	16876	12349.5	13086.8	12281.9	12108.9	6941.07	12480.3		0.822755	3.19542	0.000637653	3.29964
Ywhag	14-3-3 protein gamma OS=Mus musculus OX=10090 GN=Ywhag PE=1 SV=2	4.61	28473.7	4136.77	P61982	9	40.49	0	1433G_MOUSE	142.87	126.22	112.09	98.73	119.71	119.65	184.7	238.52	152.33	184.68	190.16	193.44	119.88	190.64		0.665899	3.19392	0.000639849	3.2626
Cyc1	Cytochrome c1_ heme protein_ mitochondrial OS=Mus musculus OX=10090 GN=Cyc1 PE=1 SV=1	9.44	35555.8	3051.37	Q9D0M3	8	37.54	0	CY1_MOUSE	417.41	432.19	339.77	324.58	313.66	333.08	494.32	681.73	537.76	571.19	510.46	579.33	360.12	562.47		0.646738	3.19392	0.000639849	3.25874
Prkcb	Protein kinase C beta type OS=Mus musculus OX=10090 GN=Prkcb PE=1 SV=4	6.6	77891.5	776.7	P68404	8	16.1	0	KPCB_MOUSE	64.88	26.24	84.36	17.5	55	75.01	168.7	144.95	87.99	130.48	194.31	195.7	53.83	153.69		1.66798	2.79221	0.00161358	3.25247
Ctbp1	C-terminal-binding protein 1 OS=Mus musculus OX=10090 GN=Ctbp1 PE=1 SV=2	6.33	48200.8	368.38	O88712	4	10.88	0	CTBP1_MOUSE	166.31	174.4	172.16	168.09	147.5	97.63	NA	NA	46.14	NA	NA	NA	154.35	46.14		-1.71514	2.75096	0.00177436	3.24183
Slc25a5	ADP/ATP translocase 2 OS=Mus musculus OX=10090 GN=Slc25a5 PE=1 SV=3	10.21	33159.5	9436.12	P51881	16	52.35	0	ADT2_MOUSE	738.74	729	818.39	528.93	811.78	732.02	1034.56	1442.23	1032.91	1210.76	1064.07	1405.75	726.48	1198.38		0.722104	3.14998	0.000707985	3.23168
Slc25a4	ADP/ATP translocase 1 OS=Mus musculus OX=10090 GN=Slc25a4 PE=1 SV=4	10.19	33132.4	10244.2	P48962	17	58.39	0	ADT1_MOUSE	2412.71	2060.08	2342.12	1668.89	2052.18	1941.93	3133.56	3832.15	3021.16	2862.49	2903.17	3514.32	2079.65	3211.14		0.629083	3.14007	0.000724316	3.20247
Amph	Amphiphysin OS=Mus musculus OX=10090 GN=Amph PE=1 SV=1	4.36	75127.3	280.82	Q7TQF7	5	7.29	0	AMPH_MOUSE	131.37	148.33	151.51	130.93	89.16	76.96	179.68	184.8	236.23	258.96	263.38	242.43	121.38	227.58		0.935288	3.041	0.000909921	3.18158
Serinc5	Serine incorporator 5 OS=Mus musculus OX=10090 GN=Serinc5 PE=2 SV=1	7.94	53770	266.15	Q8BHJ6	2	4.77	0	SERC5_MOUSE	197.69	342.38	249.9	180.07	276.5	282.83	120.49	138.92	145.62	107.71	155.11	171.26	254.9	139.85		-0.848992	3.02104	0.000952701	3.13807
Samm50	Sorting and assembly machinery component 50 homolog OS=Mus musculus OX=10090 GN=Samm50 PE=1 SV=1	6.38	52263.2	351.1	Q8BGH2	4	13.43	0	SAM50_MOUSE	90.57	72.83	79.62	NA	60.28	86.1	146.28	160.48	113.45	120.33	107.48	136.83	77.88	130.81		0.747822	2.9984	0.0010037	3.09025
Cend1	Cell cycle exit and neuronal differentiation protein 1 OS=Mus musculus OX=10090 GN=Cend1 PE=1 SV=1	9.72	15044	5491.79	Q9JKC6	5	52.35	0	CEND_MOUSE	439.12	169.86	179.81	296.72	169.1	385.41	694.15	728.26	502.73	466.47	473.83	615.53	273.34	580.16		1.17644	2.80397	0.00157049	3.04076
Atp5pb	ATP synthase F(0) complex subunit B1_ mitochondrial OS=Mus musculus OX=10090 GN=Atp5pb PE=1 SV=1	9.5	29062.9	2812.27	Q9CQQ7	11	40.23	0	AT5F1_MOUSE	460.9	518.14	433.91	301.62	402.07	327.75	634.73	877.19	641.87	631.54	571.41	689.4	407.4	674.36		0.738682	2.92368	0.00119212	3.01555
Dnaja2	DnaJ homolog subfamily A member 2 OS=Mus musculus OX=10090 GN=Dnaja2 PE=1 SV=1	6.07	46373	358.05	Q9QYJ0	4	12.38	0	DNJA2_MOUSE	NA	598.43	522.83	280.39	1018.64	544.07	95.31	325.01	48.81	75.19	203.28	356.57	592.87	184.03		-1.94235	2.30484	0.00495628	3.01414
Napa	Alpha-soluble NSF attachment protein OS=Mus musculus OX=10090 GN=Napa PE=1 SV=1	5.16	33645.9	1233.22	Q9DB05	9	39.32	0	SNAA_MOUSE	80.57	71.07	67.15	56.62	68.9	78.03	117.09	144.24	92.17	100.21	95.53	119.02	70.39	111.37		0.653595	2.92368	0.00119212	2.99585
Slc25a22	Mitochondrial glutamate carrier 1 OS=Mus musculus OX=10090 GN=Slc25a22 PE=1 SV=1	9.37	35126.7	2245.45	Q9D6M3	10	48.61	0	GHC1_MOUSE	268.15	260.27	224.04	177.02	209.41	249.44	422.99	453.2	311.07	318.73	338.98	353.95	231.39	366.49		0.663225	2.88221	0.00131157	2.95753
Rtn1	Reticulon-1 OS=Mus musculus OX=10090 GN=Rtn1 PE=1 SV=1	4.29	83914.8	205.92	Q8K0T0	2	2.82	0	RTN1_MOUSE	124.62	132.21	220.45	156.01	117.8	137.98	282.75	312.82	261.13	311.86	167.17	270.71	148.18	267.74		0.857556	2.82654	0.00149094	2.95377
Nefh	Neurofilament heavy polypeptide OS=Mus musculus OX=10090 GN=Nefh PE=1 SV=3	5.56	117280	1111.19	P19246	26	26.7	0	NFH_MOUSE	830.56	579.8	723.65	581.74	493.08	478.03	1082.76	922.01	812.95	915.91	1167.3	1198.68	614.48	1016.6		0.740674	2.84261	0.00143676	2.93753
Chchd3	MICOS complex subunit Mic19 OS=Mus musculus OX=10090 GN=Chchd3 PE=1 SV=1	8.54	26562.7	516.47	Q9CRB9	6	26.87	0	MIC19_MOUSE	66.25	50.97	46.29	47.53	46.4	46.85	78.76	99.03	72.2	65.02	74.34	77.02	50.71	77.73		0.616384	2.86403	0.00136763	2.92961
Atp6v1a	V-type proton ATPase catalytic subunit A OS=Mus musculus OX=10090 GN=Atp6v1a PE=1 SV=2	5.27	68668.4	1617.22	P50516	25	53	0	VATA_MOUSE	575.03	582.62	660.95	561.26	348.53	422.47	298.88	343.25	280.94	303.59	336.39	327.02	525.14	315.01		-0.708135	2.82654	0.00149094	2.91389
Pdha1	Pyruvate dehydrogenase E1 component subunit alpha_ somatic form_ mitochondrial OS=Mus musculus OX=10090 GN=Pdha1 PE=1 SV=1	8.14	43916.1	2144.97	P35486	17	51.28	0	ODPA_MOUSE	287.85	325.69	237.04	247.59	275.42	309.73	476.01	520.21	417.9	426.51	343.06	381.42	280.56	427.52		0.60352	2.84261	0.00143676	2.90598
Dstn	Destrin OS=Mus musculus OX=10090 GN=Dstn PE=1 SV=3	7.99	18863.8	1923.79	Q9R0P5	9	50.3	0	DEST_MOUSE	34.69	42.05	49.17	38.39	31.53	42.31	70.17	60.28	53.55	55.12	54.75	64.81	39.69	59.78		0.598702	2.84261	0.00143676	2.90498
Ndufb8	NADH dehydrogenase [ubiquinone] 1 beta subcomplex subunit 8_ mitochondrial OS=Mus musculus OX=10090 GN=Ndufb8 PE=1 SV=1	6.21	21932.9	817.01	Q9D6J5	5	38.17	0	NDUB8_MOUSE	74.4	67.35	63.19	59.56	60.07	64.66	119.85	143.84	78.77	84.21	99.62	106.06	64.87	105.39		0.673982	2.80397	0.00157049	2.88383
Napb	Beta-soluble NSF attachment protein OS=Mus musculus OX=10090 GN=Napb PE=1 SV=2	5.18	33899.2	1252.85	P28663	9	40.27	0	SNAB_MOUSE	83.66	82.69	83.66	56.3	83.22	77.31	144.12	178.69	114.19	113.96	100.43	119.92	77.81	128.55		0.711169	2.79239	0.00161293	2.88152
Ndufa12	NADH dehydrogenase [ubiquinone] 1 alpha subcomplex subunit 12 OS=Mus musculus OX=10090 GN=Ndufa12 PE=1 SV=2	9.77	17143.5	2015.48	Q7TMF3	6	57.93	0	NDUAC_MOUSE	52.09	63.2	66.94	54.38	55.6	53.68	93.77	106.89	75.56	73.07	76.33	87.31	57.65	85.49		0.561023	2.79194	0.00161459	2.84775
Slc25a11	Mitochondrial 2-oxoglutarate/malate carrier protein OS=Mus musculus OX=10090 GN=Slc25a11 PE=1 SV=3	10.44	34326.1	1960.7	Q9CR62	11	41.4	0	M2OM_MOUSE	237.66	211.25	214.94	172.62	174	191.37	343	369.38	260.93	255.11	289.88	282.63	200.31	300.16		0.579605	2.74442	0.00180126	2.80496
Uchl1	Ubiquitin carboxyl-terminal hydrolase isozyme L1 OS=Mus musculus OX=10090 GN=Uchl1 PE=1 SV=1	4.97	25180.5	941.71	Q9R0P9	6	34.98	0	UCHL1_MOUSE	79.4	75.98	74.68	75.15	52.61	79.59	103.59	193.5	88.36	168.8	116.29	129.62	72.9	133.36		0.831734	2.67876	0.00209528	2.80491
Vdac2	Voltage-dependent anion-selective channel protein 2 OS=Mus musculus OX=10090 GN=Vdac2 PE=1 SV=2	7.38	32360.2	5992.12	Q60930	11	50.17	0	VDAC2_MOUSE	454.56	439.73	356.19	330.75	428.85	375.07	865.38	768.27	454.64	579.26	637.28	578.18	397.52	647.17		0.681703	2.66791	0.00214829	2.75362
Ndufa10	NADH dehydrogenase [ubiquinone] 1 alpha subcomplex subunit 10_ mitochondrial OS=Mus musculus OX=10090 GN=Ndufa10 PE=1 SV=1	7.74	40888.6	1554.66	Q99LC3	15	57.18	0	NDUAA_MOUSE	270.99	257.93	262.65	255.75	213.36	204.22	408.8	477.08	340.99	326.43	300.44	356.17	244.15	368.32		0.584211	2.67876	0.00209528	2.74172
Ywhah	14-3-3 protein eta OS=Mus musculus OX=10090 GN=Ywhah PE=1 SV=2	4.61	28382.9	2875.46	P68510	7	34.55	0	1433F_MOUSE	71.81	74.34	77.28	62.56	71.14	73.4	116.07	141.31	81.86	110.11	90.22	114.55	71.75	109.02		0.583833	2.66791	0.00214829	2.73104
Acat1	Acetyl-CoA acetyltransferase_ mitochondrial OS=Mus musculus OX=10090 GN=Acat1 PE=1 SV=1	8.68	45158.4	2031.01	Q8QZT1	14	49.76	0	THIL_MOUSE	252.06	232.25	218.82	169.54	207.15	213.66	363.33	386.83	279.19	304.23	274.26	303.46	215.58	318.55		0.561605	2.66856	0.00214508	2.72701
Atp5f1d	ATP synthase subunit delta_ mitochondrial OS=Mus musculus OX=10090 GN=Atp5f1d PE=1 SV=1	4.8	17600.1	1521.92	Q9D3D9	2	13.69	0	ATPD_MOUSE	58.82	76.99	66.31	45.27	120.9	81.66	162.56	183.06	89.4	124.8	126.95	155.94	74.99	140.45		0.935657	2.52444	0.00298925	2.69226
Atp5me	ATP synthase subunit e_ mitochondrial OS=Mus musculus OX=10090 GN=Atp5me PE=1 SV=2	9.84	8235.62	1083.97	Q06185	2	33.8	0	ATP5I_MOUSE	17.3	14.49	19.31	16.67	18.16	14.83	26.03	36.49	20.58	22.4	23.08	28.47	16.79	26.18		0.621132	2.61596	0.00242125	2.68869
Ndufs3	NADH dehydrogenase [ubiquinone] iron-sulfur protein 3_ mitochondrial OS=Mus musculus OX=10090 GN=Ndufs3 PE=1 SV=2	6.81	30320.4	1920.07	Q9DCT2	8	37.26	0	NDUS3_MOUSE	196.65	186.66	188.56	151.21	158.61	162.56	279.85	315.82	214.58	238.13	221.58	246.44	174.04	252.73		0.532002	2.61596	0.00242125	2.66951
Atp5po	ATP synthase subunit O_ mitochondrial OS=Mus musculus OX=10090 GN=Atp5po PE=1 SV=1	10.66	23420.6	9465.07	Q9DB20	13	70.42	0	ATPO_MOUSE	482.97	420.02	445.2	391.9	395.18	482.46	672.26	847.09	505.84	661.21	569.08	618.6	436.29	645.68		0.552119	2.5982	0.00252233	2.65621
Ckb	Creatine kinase B-type OS=Mus musculus OX=10090 GN=Ckb PE=1 SV=1	5.3	42998.5	6212.84	Q04447	17	64.04	0	KCRB_MOUSE	1483.4	1391	1324.28	1442.52	1241.14	1128.35	1909.75	2112.27	1692.41	1720.67	1777.06	1734.96	1335.11	1824.52		0.452319	2.5982	0.00252233	2.63728
Nefm	Neurofilament medium polypeptide OS=Mus musculus OX=10090 GN=Nefm PE=1 SV=4	4.56	96030.3	2047.57	P08553	30	38.68	0	NFM_MOUSE	1449.33	1621.58	1686.95	1362.63	1382.33	1499.66	2418.43	2353.94	1481.15	2584.8	2964.3	3497.4	1500.41	2550		0.722426	2.531	0.0029444	2.63209
Slc1a3	Excitatory amino acid transporter 1 OS=Mus musculus OX=10090 GN=Slc1a3 PE=1 SV=2	8.67	59793.7	625.5	P56564	5	15.29	0	EAA1_MOUSE	226.09	241.1	335.69	282.12	153.43	243.65	430.14	470.88	331.48	333.26	398.91	409.54	247.01	395.7		0.707241	2.52909	0.00295743	2.62611
Tubb2b	Tubulin beta-2B chain OS=Mus musculus OX=10090 GN=Tubb2b PE=1 SV=1	4.59	50409.4	15135	Q9CWF2	22	59.1	0	TBB2B_MOUSE	282.63	333.55	296.12	239.77	244.48	209.85	475.3	755.18	346.82	386.78	416.31	388.06	267.73	461.41		0.750262	2.50311	0.00313972	2.61313
Map6d1	MAP6 domain-containing protein 1 OS=Mus musculus OX=10090 GN=Map6d1 PE=1 SV=1	10.23	20660.8	870.08	Q14BB9	4	42.41	0	MA6D1_MOUSE	47.14	41.32	44.74	47.24	47.35	48.63	37.34	43.36	23.33	27.57	23.45	26.4	46.07	30.24		-0.646347	2.52909	0.00295743	2.61037
Nefl	Neurofilament light polypeptide OS=Mus musculus OX=10090 GN=Nefl PE=1 SV=5	4.41	61565.6	4945.19	P08551	27	51.75	0	NFL_MOUSE	1240.9	1240.21	1184.81	1099.86	1049.08	1043.45	1763.4	1884.18	1318.98	1427.51	2147.86	2814.59	1143.05	1892.76		0.684435	2.51165	0.0030786	2.60323
Atp5f1b	ATP synthase subunit beta_ mitochondrial OS=Mus musculus OX=10090 GN=Atp5f1b PE=1 SV=2	5.03	56300.6	11515.7	P56480	24	64.84	0	ATPB_MOUSE	9109.5	8633.05	6508.27	6142.79	7903.97	6652.46	11498.9	13957.7	12224	10294.4	8560.21	11443.8	7491.67	11329.8		0.596849	2.531	0.0029444	2.60042
Opalin	Opalin OS=Mus musculus OX=10090 GN=Opalin PE=1 SV=1	4.64	15947	2696.08	Q7M750	3	38.46	0	OPALI_MOUSE	119.61	169.75	176.11	156.45	119.55	126.22	100.81	110.28	74.97	86.24	86.66	110.48	144.62	94.91		-0.602773	2.52909	0.00295743	2.59992
Tomm70	Mitochondrial import receptor subunit TOM70 OS=Mus musculus OX=10090 GN=Tomm70 PE=1 SV=2	7.39	68331.7	385.58	Q9CZW5	8	18.17	0	TOM70_MOUSE	173.3	170.58	161.26	142.14	137.6	165.9	240.65	312.32	209.08	223.54	196.67	206.24	158.46	231.42		0.533906	2.531	0.0029444	2.5867
Dlat	Dihydrolipoyllysine-residue acetyltransferase component of pyruvate dehydrogenase complex_ mitochondrial OS=Mus musculus OX=10090 GN=Dlat PE=1 SV=2	8.71	68512.1	944.56	Q8BMF4	19	38.01	0	ODP2_MOUSE	554.86	428.02	431.58	339.92	292.42	452.39	715.11	765.42	561.45	642.32	534.41	618.42	416.53	639.52		0.637194	2.49643	0.00318841	2.57646
Sfxn3	Sideroflexin-3 OS=Mus musculus OX=10090 GN=Sfxn3 PE=1 SV=1	9.88	35691.4	1786.46	Q91V61	10	50.47	0	SFXN3_MOUSE	222.39	182.74	209.08	186.36	186.63	193.77	298.85	354.44	242.71	244.85	251.48	273.81	196.83	277.69		0.486693	2.52909	0.00295743	2.57549
Atp6v1b2	V-type proton ATPase subunit B_ brain isoform OS=Mus musculus OX=10090 GN=Atp6v1b2 PE=1 SV=1	5.46	56893.1	1586.54	P62814	18	48.73	0	VATB2_MOUSE	683.11	578.06	732.87	621.92	429.02	498.96	356.99	344.15	381.34	339.52	385.77	501.43	590.66	384.87		-0.607718	2.50168	0.00315007	2.57444
Dlst	Dihydrolipoyllysine-residue succinyltransferase component of 2-oxoglutarate dehydrogenase complex_ mitochondrial OS=Mus musculus OX=10090 GN=Dlst PE=1 SV=1	9.36	49336.8	711.09	Q9D2G2	7	19.82	0	ODO2_MOUSE	299.72	271.27	256.85	203.01	236.18	236.99	382.27	427.82	295.07	358.31	325.49	343.37	250.67	355.39		0.504284	2.48293	0.00328905	2.53362
Mtch2	Mitochondrial carrier homolog 2 OS=Mus musculus OX=10090 GN=Mtch2 PE=1 SV=1	8.2	34126.5	403.21	Q791V5	4	16.83	0	MTCH2_MOUSE	111.47	129.85	62.81	54.49	66.58	86.08	137.52	172.16	145.16	132.25	119	138.94	85.21	140.84		0.787697	2.38942	0.00407927	2.51591
Suclg1	Succinate--CoA ligase [ADP/GDP-forming] subunit alpha_ mitochondrial OS=Mus musculus OX=10090 GN=Suclg1 PE=1 SV=4	9.93	36497	608	Q9WUM5	7	27.17	0	SUCA_MOUSE	206.39	206.17	147.06	107.41	182.21	156.14	288	289.64	222.6	250.82	225.56	257.89	167.56	255.75		0.63742	2.41944	0.00380679	2.502
Slc25a3	Phosphate carrier protein_ mitochondrial OS=Mus musculus OX=10090 GN=Slc25a3 PE=1 SV=1	9.6	40088.6	4551.37	Q8VEM8	16	45.66	0	MPCP_MOUSE	1531.26	1456.97	1082.05	965.61	930	1265.95	1720.29	2573.28	1453.95	1925.92	1744.77	1882.17	1205.31	1883.4		0.648454	2.40743	0.00391354	2.49323
Tubb6	Tubulin beta-6 chain OS=Mus musculus OX=10090 GN=Tubb6 PE=1 SV=1	4.59	50546.7	6791.88	Q922F4	13	29.53	0	TBB6_MOUSE	135.34	127.66	116.82	110.66	110.46	115.47	189.84	169.56	139.98	156	155.08	150.26	119.4	160.12		0.420577	2.41359	0.0038584	2.44996
Atp1b2	Sodium/potassium-transporting ATPase subunit beta-2 OS=Mus musculus OX=10090 GN=Atp1b2 PE=1 SV=2	8.35	33743.4	679.22	P14231	5	22.76	0	AT1B2_MOUSE	181.2	197.96	194.96	171.03	158.84	202.31	297.07	319.09	200.17	213.99	304.09	293.74	184.38	271.36		0.539702	2.36997	0.0042661	2.43064
Auh	Methylglutaconyl-CoA hydratase_ mitochondrial OS=Mus musculus OX=10090 GN=Auh PE=1 SV=1	10.09	33680.2	739.6	Q9JLZ3	6	23.25	0	AUHM_MOUSE	100.88	96.23	82.33	56.92	87.05	89.66	144.33	173.71	102.67	127.82	109.08	135.5	85.51	132.19		0.629285	2.34029	0.00456778	2.42342
Atp5pd	ATP synthase subunit d_ mitochondrial OS=Mus musculus OX=10090 GN=Atp5pd PE=1 SV=3	5.38	18806.5	7293.02	Q9DCX2	11	80.12	0	ATP5H_MOUSE	326.98	354.55	232.53	333.32	217.49	335.02	468.58	688.28	407.06	458.31	484.18	352.16	299.98	476.43		0.661653	2.30612	0.00494171	2.39916
Ndufb10	NADH dehydrogenase [ubiquinone] 1 beta subcomplex subunit 10 OS=Mus musculus OX=10090 GN=Ndufb10 PE=1 SV=3	8.08	21309	3497.49	Q9DCS9	8	55.11	0	NDUBA_MOUSE	126.98	121.53	107.15	85.2	102.9	100.47	155.9	221.56	138.1	132.88	147.1	152.26	107.37	157.97		0.547502	2.33075	0.00466924	2.3942
Atp5f1a	ATP synthase subunit alpha_ mitochondrial OS=Mus musculus OX=10090 GN=Atp5f1a PE=1 SV=1	9.63	59866.8	10946.7	Q03265	26	55.15	0	ATPA_MOUSE	8455.47	9279.85	7390.69	6878.8	7046.84	8725.7	12934.4	15429.5	10540	10685.3	9474.67	10331.5	7962.89	11565.9		0.527511	2.33464	0.00462768	2.39349
Ndufb9	NADH dehydrogenase [ubiquinone] 1 beta subcomplex subunit 9 OS=Mus musculus OX=10090 GN=Ndufb9 PE=1 SV=3	7.75	22269.2	781.59	Q9CQJ8	7	55.31	0	NDUB9_MOUSE	92.12	85.57	99.5	65.08	77.6	82.22	152.63	186.68	104.7	101.7	111.55	124.15	83.68	130.23		0.614909	2.30484	0.00495628	2.38546
Immt	MICOS complex subunit Mic60 OS=Mus musculus OX=10090 GN=Immt PE=1 SV=1	6.19	84299.4	1317.82	Q8CAQ8	30	47.69	0	MIC60_MOUSE	602.3	498.14	490.26	392.23	443.82	426.38	710.8	828.68	598.27	588.03	651.57	628.92	475.52	667.71		0.493225	2.33075	0.00466924	2.38237
Gstp1	Glutathione S-transferase P 1 OS=Mus musculus OX=10090 GN=Gstp1 PE=1 SV=2	7.96	23780.3	7574.7	P19157	8	53.33	0	GSTP1_MOUSE	479.3	278.77	322.46	237.85	313.2	360.35	521.1	481.69	507.62	448.53	516.45	422.78	331.99	483.03		0.571916	2.30612	0.00494171	2.37598
Ldhb	L-lactate dehydrogenase B chain OS=Mus musculus OX=10090 GN=Ldhb PE=1 SV=2	5.65	36857.5	2839.34	P16125	10	36.23	0	LDHB_MOUSE	277.85	239.98	252.66	214.17	225.7	214.56	423.29	460.77	298.18	306.08	271.04	346.78	237.49	351.03		0.543225	2.31159	0.00487992	2.37456
Ndufb4	NADH dehydrogenase [ubiquinone] 1 beta subcomplex subunit 4 OS=Mus musculus OX=10090 GN=Ndufb4 PE=1 SV=3	10.31	15081.3	1990.91	Q9CQC7	5	46.51	0	NDUB4_MOUSE	72.56	70.98	67.89	72.2	58.97	68.29	84.19	106.3	72.32	97.77	101.08	102.96	68.48	94.1		0.44925	2.32555	0.0047255	2.36855
Ndufv1	NADH dehydrogenase [ubiquinone] flavoprotein 1_ mitochondrial OS=Mus musculus OX=10090 GN=Ndufv1 PE=1 SV=1	8.16	51518.6	3846.07	Q91YT0	21	61.85	0	NDUV1_MOUSE	365.91	404.17	390.25	291.3	302.03	319.94	566.86	662.67	436.65	456.39	421.87	463.02	345.6	501.24		0.528342	2.30886	0.00491061	2.36854
Tpi1	Triosephosphate isomerase OS=Mus musculus OX=10090 GN=Tpi1 PE=1 SV=4	5.44	32705	1694	P17751	12	56.19	0	TPIS_MOUSE	167.36	162.79	191.41	165.08	111.41	144.41	272.57	262.41	213.19	206.44	196.5	206.17	157.08	226.21		0.533805	2.30484	0.00495628	2.36585
Stxbp6	Syntaxin-binding protein 6 OS=Mus musculus OX=10090 GN=Stxbp6 PE=1 SV=1	9.72	23956.2	942.44	Q8R3T5	6	35.24	0	STXB6_MOUSE	125.68	122.25	99.57	87	90.84	97.67	74.67	92.52	58.53	65.01	63.22	78.7	103.83	72.11		-0.52909	2.30484	0.00495628	2.36479
Ndufs2	NADH dehydrogenase [ubiquinone] iron-sulfur protein 2_ mitochondrial OS=Mus musculus OX=10090 GN=Ndufs2 PE=1 SV=1	6.58	53025	1304.04	Q91WD5	13	38.44	0	NDUS2_MOUSE	340.57	315.13	295.87	242.68	257.58	344.85	399.11	516.17	342.47	419.07	388.93	475.58	299.45	423.55		0.499682	2.30612	0.00494171	2.35964
Pacsin2	Protein kinase C and casein kinase substrate in neurons protein 2 OS=Mus musculus OX=10090 GN=Pacsin2 PE=1 SV=1	4.92	56175.1	318.45	Q9WVE8	6	13.58	0	PACN2_MOUSE	114.8	106.65	143.78	128.3	97.14	102.15	73.29	107.26	71.11	64.21	76.82	88.45	115.47	80.19		-0.533322	2.27034	0.00536614	2.33214
Atp5md	Up-regulated during skeletal muscle growth protein 5 OS=Mus musculus OX=10090 GN=Atp5md PE=1 SV=1	10.32	6438.56	7191.37	Q78IK2	2	43.1	0	USMG5_MOUSE	53.59	50.43	49.41	30.33	43.46	47.05	72.64	74.65	57.18	60.52	58.14	69.72	45.71	65.47		0.533209	2.25908	0.00550705	2.32115
Camk2d	Calcium/calmodulin-dependent protein kinase type II subunit delta OS=Mus musculus OX=10090 GN=Camk2d PE=1 SV=1	6.88	56996.8	1258.74	Q6PHZ2	6	13.83	0	KCC2D_MOUSE	71.03	54.49	70.3	59.44	58.64	56.61	79.48	87.73	78.38	80.53	71.07	94.92	61.75	82.02		0.411218	2.25908	0.00550705	2.2962
Ndufb5	NADH dehydrogenase [ubiquinone] 1 beta subcomplex subunit 5_ mitochondrial OS=Mus musculus OX=10090 GN=Ndufb5 PE=1 SV=1	9.81	21767.2	642.09	Q9CQH3	4	21.16	0	NDUB5_MOUSE	45.55	57.04	42.68	46.19	53.82	48.79	77.01	88.78	45.34	67.23	85.38	84.63	49.01	74.73		0.580824	2.19641	0.00636201	2.27191
Prkcg	Protein kinase C gamma type OS=Mus musculus OX=10090 GN=Prkcg PE=1 SV=1	7.19	79612.4	1045.84	P63318	23	46.2	0	KPCG_MOUSE	464.57	373.26	407.61	391.88	396.83	439.34	463.7	545.99	484.07	539.44	602.3	639.09	412.25	545.77		0.399618	2.20913	0.00617833	2.24498
Ndufa13	NADH dehydrogenase [ubiquinone] 1 alpha subcomplex subunit 13 OS=Mus musculus OX=10090 GN=Ndufa13 PE=1 SV=3	9.88	16859.7	2080.11	Q9ERS2	5	39.58	0	NDUAD_MOUSE	146.17	94.82	112.52	75.82	87.55	105.5	130.43	198.07	137.67	148.8	139.57	152.31	103.73	151.14		0.560785	2.13435	0.00733926	2.20679
Mdh1	Malate dehydrogenase_ cytoplasmic OS=Mus musculus OX=10090 GN=Mdh1 PE=1 SV=3	6.18	36682.3	2205.48	P14152	12	40.72	0	MDHC_MOUSE	338.19	275.69	309.61	250.01	231.5	315.53	847.86	743.42	360.77	416.66	357.78	377.28	286.76	517.3		0.766759	2.05341	0.0088429	2.19189
Ndufa4	Cytochrome c oxidase subunit NDUFA4 OS=Mus musculus OX=10090 GN=Ndufa4 PE=1 SV=2	10.04	9326.81	5124	Q62425	6	56.1	0	NDUA4_MOUSE	160.3	147.84	132.34	139.71	120.61	146.21	235.77	316.97	149.56	207.77	173.24	200.38	141.17	213.95		0.563844	2.10553	0.00784276	2.17972
Mpc2	Mitochondrial pyruvate carrier 2 OS=Mus musculus OX=10090 GN=Mpc2 PE=1 SV=1	11.22	14343	1662.65	Q9D023	3	22.05	0	MPC2_MOUSE	46.18	53.22	43.77	57.82	35.5	46.78	64.32	76.12	65.45	57.63	58.93	61.55	47.21	64		0.44951	2.11845	0.00761294	2.16561
Epb41l2	Band 4.1-like protein 2 OS=Mus musculus OX=10090 GN=Epb41l2 PE=1 SV=2	5.15	110453	418.38	O70318	19	22.77	0	E41L2_MOUSE	711.62	584.89	615.48	487.05	452.89	539.97	405.19	510.89	357.21	379.93	338.9	432.82	565.32	404.16		-0.481392	2.10793	0.00779948	2.1622
Nme1	Nucleoside diphosphate kinase A OS=Mus musculus OX=10090 GN=Nme1 PE=1 SV=1	7.27	17321.9	20680.3	P15532	16	86.18	0	NDKA_MOUSE	3440.76	4219.49	3078.52	2674.04	2296.37	3049.48	1747.93	2521.62	1336.02	1869.75	1926.05	2753.03	3126.44	2025.73		-0.640254	2.05587	0.00879288	2.15326
Ndufb7	NADH dehydrogenase [ubiquinone] 1 beta subcomplex subunit 7 OS=Mus musculus OX=10090 GN=Ndufb7 PE=1 SV=3	8.25	16558.9	1004.55	Q9CR61	7	64.96	0	NDUB7_MOUSE	72.14	85.74	72.91	49.83	51.49	78.4	133.63	109.29	109.46	69.24	92.63	114.27	68.42	104.75		0.615168	2.05408	0.00882912	2.14422
Eno1	Alpha-enolase OS=Mus musculus OX=10090 GN=Eno1 PE=1 SV=3	6.41	47483.1	25664.9	P17182	26	74.19	0	ENOA_MOUSE	6782.44	8050.52	7615.94	8333.99	5229.94	5421.82	2866.74	3971.27	4352.6	4829.49	5651.8	5555.59	6905.77	4537.91		-0.61818	2.04668	0.00898086	2.138
Aco2	Aconitate hydratase_ mitochondrial OS=Mus musculus OX=10090 GN=Aco2 PE=1 SV=1	7.84	86205	5059.09	Q99KI0	36	57.69	0	ACON_MOUSE	3157.94	1808.78	2050.64	2502	3098.52	2927.63	3698.44	4785.87	3559.17	3420.66	3060.13	4016.88	2590.92	3756.86		0.552785	2.05408	0.00882912	2.12716
Ndufv2	NADH dehydrogenase [ubiquinone] flavoprotein 2_ mitochondrial OS=Mus musculus OX=10090 GN=Ndufv2 PE=1 SV=2	7.19	27627.5	583.01	Q9D6J6	5	27.42	0	NDUV2_MOUSE	104.53	96.32	93.17	120.64	86.85	78.28	142.69	149.91	132.99	160.71	94.01	137.39	96.63	136.28		0.490023	2.01887	0.00957485	2.07749
Ndufa7	NADH dehydrogenase [ubiquinone] 1 alpha subcomplex subunit 7 OS=Mus musculus OX=10090 GN=Ndufa7 PE=1 SV=3	10.79	12632.6	1995.96	Q9Z1P6	5	47.79	0	NDUA7_MOUSE	41.93	43.66	29.73	24.36	36.76	42.6	68.18	64.29	35.17	54.83	52.46	61.75	36.51	56.11		0.620199	1.97989	0.0104739	2.07476
Sdha	Succinate dehydrogenase [ubiquinone] flavoprotein subunit_ mitochondrial OS=Mus musculus OX=10090 GN=Sdha PE=1 SV=1	7.06	73669.1	1510.7	Q8K2B3	21	47.44	0	SDHA_MOUSE	584.38	554.91	527.29	510.37	422.88	445.59	783.9	1021.07	703.57	619.78	571.3	641.34	507.57	723.49		0.4932	2.00862	0.00980346	2.06829
Hk1	Hexokinase-1 OS=Mus musculus OX=10090 GN=Hk1 PE=1 SV=3	6.38	109615	2622.76	P17710	38	46	0	HXK1_MOUSE	1542.26	1035.79	1108.47	965.44	918.89	964.3	1629.52	1913.69	1410.08	1354.78	1274.05	1481.71	1089.19	1510.64		0.482034	1.97989	0.0104739	2.03773
Cisd1	CDGSH iron-sulfur domain-containing protein 1 OS=Mus musculus OX=10090 GN=Cisd1 PE=1 SV=1	9.51	12268.1	3882.18	Q91WS0	3	34.26	0	CISD1_MOUSE	48.41	78.51	115.57	83.79	87.19	94.09	107.94	187.22	112.68	147.27	139.85	97.99	84.6	132.16		0.654659	1.91253	0.0122313	2.02147
Cdc42ep1	Cdc42 effector protein 1 OS=Mus musculus OX=10090 GN=Cdc42ep1 PE=1 SV=1	6.79	43153.1	279.4	Q91W92	4	16.87	0	BORG5_MOUSE	115.46	105.12	76.08	82.06	70.84	91.81	54.9	54.24	NA	NA	NA	NA	90.23	54.57		-0.703701	1.89454	0.0127484	2.02101
Phb	Prohibitin OS=Mus musculus OX=10090 GN=Phb PE=1 SV=1	5.44	29877.2	3000	P67778	10	42.65	0	PHB_MOUSE	196.98	163.36	156.33	119.32	126.96	153.56	273.19	263.57	172.61	183.26	193.77	217.57	152.75	217.33		0.506102	1.95091	0.0111966	2.01549
Sdhb	Succinate dehydrogenase [ubiquinone] iron-sulfur subunit_ mitochondrial OS=Mus musculus OX=10090 GN=Sdhb PE=1 SV=1	8.72	32612.4	1400.23	Q9CQA3	12	46.1	0	SDHB_MOUSE	207.74	202.45	173.82	137.03	150.53	182.71	278.93	304.22	200.45	240.65	196.07	248.45	175.71	244.79		0.475914	1.95847	0.0110035	2.01546
Slc1a2	Excitatory amino acid transporter 2 OS=Mus musculus OX=10090 GN=Slc1a2 PE=1 SV=1	6.28	62543.7	2112.71	P43006	11	24.48	0	EAA2_MOUSE	542.25	565.17	774.14	616.39	594.26	561.75	755.88	798.47	642.85	862.27	844.29	1028.89	609	822.11		0.428945	1.96919	0.0107353	2.01536
Hspa12a	Heat shock 70 kDa protein 12A OS=Mus musculus OX=10090 GN=Hspa12a PE=1 SV=1	6.35	75213.7	676.87	Q8K0U4	14	27.11	0	HS12A_MOUSE	374.82	341.42	356.43	263.15	298.2	287.94	244.15	272.17	197.56	209.65	249.32	268.37	320.33	240.2		-0.414088	1.9693	0.0107324	2.01237
Atp6v1e1	V-type proton ATPase subunit E 1 OS=Mus musculus OX=10090 GN=Atp6v1e1 PE=1 SV=2	8.95	26214.5	4154.56	P50518	9	40.71	0	VATE1_MOUSE	369.3	431.74	410.9	370.87	422.43	445.09	284.43	454.6	257.64	215.68	270.32	294.63	408.39	296.22		-0.499496	1.9464	0.0113135	2.00947
Fh	Fumarate hydratase_ mitochondrial OS=Mus musculus OX=10090 GN=Fh PE=1 SV=3	9.51	54585	1085.72	P97807	13	39.25	0	FUMH_MOUSE	284.8	276.93	214.34	205.67	225.16	220.42	291.62	433.42	298.47	314.64	295.1	297.98	237.89	321.87		0.432776	1.96203	0.0109136	2.0092
Uqcrc1	Cytochrome b-c1 complex subunit 1_ mitochondrial OS=Mus musculus OX=10090 GN=Uqcrc1 PE=1 SV=2	5.8	53479.2	4589.31	Q9CZ13	18	53.75	0	QCR1_MOUSE	1297.76	831.65	1166.82	592.22	975.37	1246.84	1911	2467.37	1681.36	1009.02	1517	1428.04	1018.44	1668.97		0.709331	1.8767	0.0132832	2.00628
Pgam1	Phosphoglycerate mutase 1 OS=Mus musculus OX=10090 GN=Pgam1 PE=1 SV=3	6.82	28946.1	534.76	Q9DBJ1	7	37.8	0	PGAM1_MOUSE	90.72	77.24	100.42	76.53	69.93	86.08	128.06	159.27	107.62	129.93	89.64	95.95	83.49	118.41		0.486626	1.94408	0.0113743	2.00405
Rdx	Radixin OS=Mus musculus OX=10090 GN=Rdx PE=1 SV=3	5.85	68657	1634.74	P26043	23	41.34	0	RADI_MOUSE	498.65	447.41	397.4	372.38	312.56	385.94	286.82	335.83	236.7	256.19	317.05	338.5	402.39	295.18		-0.444581	1.95091	0.0111966	2.00093
Pebp1	Phosphatidylethanolamine-binding protein 1 OS=Mus musculus OX=10090 GN=Pebp1 PE=1 SV=3	5.03	21001.5	1360.62	P70296	6	56.68	0	PEBP1_MOUSE	84	72.04	70.26	65.45	63.12	76	99.87	134.3	85.79	98.17	79.24	90.27	71.81	97.94		0.432938	1.9464	0.0113135	1.99397
Phb2	Prohibitin-2 OS=Mus musculus OX=10090 GN=Phb2 PE=1 SV=1	10.39	33296.4	2168.6	O35129	16	57.86	0	PHB2_MOUSE	193.47	201.48	170.77	104.42	169.02	192.82	213.03	282.02	230.82	229.19	212.3	288.12	172	242.58		0.516882	1.91272	0.0122259	1.98133
Ndufa9	NADH dehydrogenase [ubiquinone] 1 alpha subcomplex subunit 9_ mitochondrial OS=Mus musculus OX=10090 GN=Ndufa9 PE=1 SV=2	10.24	42639.3	2309.74	Q9DC69	14	50.66	0	NDUA9_MOUSE	352.5	271.37	243.37	212.91	222.34	247.59	383.04	519.79	307.45	336.42	319.48	330.82	258.34	366.17		0.499302	1.91606	0.0121323	1.98004
Atp1a2	Sodium/potassium-transporting ATPase subunit alpha-2 OS=Mus musculus OX=10090 GN=Atp1a2 PE=1 SV=1	5.24	113529	8787.35	Q6PIE5	43	49.61	0	AT1A2_MOUSE	1618.41	1659.61	1465.1	1495.83	1469.47	1243.9	1940.45	2198.33	1752.24	1890.18	1645.93	2014.27	1492.05	1906.9		0.353692	1.9464	0.0113135	1.97828
Thy1	Thy-1 membrane glycoprotein OS=Mus musculus OX=10090 GN=Thy1 PE=1 SV=1	9.29	18308.1	6764.33	P01831	5	35.19	0	THY1_MOUSE	1114.27	656.12	920.92	757.55	601.57	853.29	1310.93	1462.53	1251.47	829.9	993.03	1329.31	817.29	1196.2		0.554612	1.88954	0.0128963	1.96925
Rab6b	Ras-related protein Rab-6B OS=Mus musculus OX=10090 GN=Rab6b PE=1 SV=1	5.22	23575.8	1333.04	P61294	5	25.96	0	RAB6B_MOUSE	33.33	27.07	23.77	25.79	19.87	27.34	33.57	42.99	35.95	37.08	32.16	29.36	26.19	35.19		0.432642	1.91606	0.0121323	1.96429
Eci1	Enoyl-CoA delta isomerase 1_ mitochondrial OS=Mus musculus OX=10090 GN=Eci1 PE=1 SV=2	9.33	32535.7	2530.99	P42125	7	29.76	0	ECI1_MOUSE	364.56	367.64	350.58	284.42	250.48	294.69	410.05	432.4	364.55	369.29	455.15	492.56	318.73	420.67		0.406595	1.90745	0.0123753	1.9503
Ndufb11	NADH dehydrogenase [ubiquinone] 1 beta subcomplex subunit 11_ mitochondrial OS=Mus musculus OX=10090 GN=Ndufb11 PE=1 SV=2	4.92	17500.8	2013.75	O09111	4	37.09	0	NDUBB_MOUSE	60.82	65.59	54.04	43.66	53.85	53.98	98.46	115.62	58.48	81.48	73.34	62.13	55.32	81.58		0.529234	1.8761	0.0133015	1.94932
Mgll	Monoglyceride lipase OS=Mus musculus OX=10090 GN=Mgll PE=1 SV=1	6.76	33729.7	263.41	O35678	2	9.57	0	MGLL_MOUSE	65.88	42.01	58.95	42.42	46.29	56.48	86.55	83.63	71.3	59.74	55.48	79.46	52	72.69		0.48485	1.8767	0.0132832	1.93832
Atp2b1	Plasma membrane calcium-transporting ATPase 1 OS=Mus musculus OX=10090 GN=Atp2b1 PE=1 SV=1	5.56	135717	598.38	G5E829	23	25.08	0	AT2B1_MOUSE	1117.34	1050.51	882.87	813.42	899.78	938.88	1360.89	1522.98	1106.96	1145.46	1071.13	1227.53	950.47	1239.16		0.379785	1.87929	0.013204	1.91728
Pafah1b2	Platelet-activating factor acetylhydrolase IB subunit beta OS=Mus musculus OX=10090 GN=Pafah1b2 PE=1 SV=2	5.52	25752.5	321.75	Q61206	2	12.23	0	PA1B2_MOUSE	47.91	38.42	51.29	38.36	34.7	40.82	58.45	66.36	48.56	52.85	50.72	51.21	41.92	54.69		0.388915	1.8767	0.0132832	1.91657
Cadm2	Cell adhesion molecule 2 OS=Mus musculus OX=10090 GN=Cadm2 PE=1 SV=2	5.08	48015.1	337.46	Q8BLQ9	4	12.18	0	CADM2_MOUSE	114.06	92.89	99.98	98.09	81.39	76.5	119.82	128.6	109.45	108.3	121.24	133.11	93.82	120.09		0.364636	1.8761	0.0133015	1.9112
Gdap1	Ganglioside-induced differentiation-associated protein 1 OS=Mus musculus OX=10090 GN=Gdap1 PE=1 SV=1	8.51	41538.9	233.81	O88741	2	7.54	0	GDAP1_MOUSE	120.98	132.84	64.85	56.59	56.4	81	138.75	164.23	117.4	111.6	109.92	127.98	85.44	128.31		0.660388	1.78637	0.0163544	1.90452
Uqcrb	Cytochrome b-c1 complex subunit 7 OS=Mus musculus OX=10090 GN=Uqcrb PE=1 SV=3	9.61	13527.5	3679	Q9D855	8	52.25	0	QCR7_MOUSE	82.71	113.22	92.04	94.07	82.71	73.47	188.92	242.14	77.78	104.52	156.13	149.44	89.7	153.16		0.689736	1.76703	0.017099	1.89687
Cox7a2	Cytochrome c oxidase subunit 7A2_ mitochondrial OS=Mus musculus OX=10090 GN=Cox7a2 PE=1 SV=2	10.87	9290.91	3153.37	P48771	2	27.71	0	CX7A2_MOUSE	43.19	93.19	118.31	47.53	88.6	119.25	182.14	220.4	125.42	98.69	98.07	151.07	85.01	145.96		0.824025	1.69067	0.0203857	1.8808
Map6	Microtubule-associated protein 6 OS=Mus musculus OX=10090 GN=Map6 PE=1 SV=2	10.16	96735	492	Q7TSJ2	15	20.53	0	MAP6_MOUSE	543.41	566.52	346.67	415.3	424.89	599.2	356.01	365.46	192.91	270.06	373.81	402.51	482.66	326.79		-0.577974	1.76703	0.017099	1.85915
Bcas1	Breast carcinoma-amplified sequence 1 homolog OS=Mus musculus OX=10090 GN=Bcas1 PE=1 SV=3	5.84	67833.8	3375.04	Q80YN3	18	33.02	0	BCAS1_MOUSE	3757.24	3930.94	5478.41	3428.85	2516.66	3195.09	2792.71	2520	2616.3	1623.89	2510.21	2991.18	3717.86	2509.05		-0.552134	1.76515	0.0171732	1.84949
Ogdh	2-oxoglutarate dehydrogenase_ mitochondrial OS=Mus musculus OX=10090 GN=Ogdh PE=1 SV=3	6.4	117647	570.5	Q60597	20	23.26	0	ODO1_MOUSE	603.33	555.92	528.92	365.51	439.08	500.49	784.74	785.94	577.82	654.12	587.26	609.14	498.87	666.5		0.424829	1.79754	0.0159389	1.84706
Acsl6	Long-chain-fatty-acid--CoA ligase 6 OS=Mus musculus OX=10090 GN=Acsl6 PE=1 SV=1	7.03	79043.9	276.94	Q91WC3	2	4.45	0	ACSL6_MOUSE	NA	100.37	95.32	93.84	95.34	87.5	119	169.37	132.35	123.09	101.99	111.93	94.47	126.29		0.401114	1.78637	0.0163544	1.83085
Vsnl1	Visinin-like protein 1 OS=Mus musculus OX=10090 GN=Vsnl1 PE=1 SV=2	4.82	22313.5	6996.63	P62761	13	72.25	0	VISL1_MOUSE	518.88	428.3	502.45	435.93	308.36	294.98	317	316.64	243.4	251.15	298.52	334.74	414.82	293.58		-0.475376	1.76703	0.017099	1.82986
Pdhb	Pyruvate dehydrogenase E1 component subunit beta_ mitochondrial OS=Mus musculus OX=10090 GN=Pdhb PE=1 SV=1	6.47	39279.3	4876.27	Q9D051	13	46.8	0	ODPB_MOUSE	570.17	528.27	423.2	317.54	405.64	478.17	688.79	787.53	553.74	564.75	527.81	589.53	453.83	618.69		0.458189	1.77144	0.0169262	1.82974
Ndufs4	NADH dehydrogenase [ubiquinone] iron-sulfur protein 4_ mitochondrial OS=Mus musculus OX=10090 GN=Ndufs4 PE=1 SV=3	10.7	19841.8	1454.56	Q9CXZ1	7	40.57	0	NDUS4_MOUSE	75.11	72.07	39.23	47.16	65.98	70.35	83.23	107.69	74.88	85.68	68.14	108.49	61.65	88.02		0.532157	1.72946	0.0186439	1.80949
Bdh1	D-beta-hydroxybutyrate dehydrogenase_ mitochondrial OS=Mus musculus OX=10090 GN=Bdh1 PE=1 SV=2	9.34	38641.2	1990.56	Q80XN0	11	38.19	0	BDH_MOUSE	272.55	264.52	222.92	198.81	200.54	221.96	332.75	390.99	261.32	266.1	261.78	311.64	230.22	304.1		0.395931	1.76515	0.0171732	1.80901
Rac1	Ras-related C3 botulinum toxin substrate 1 OS=Mus musculus OX=10090 GN=Rac1 PE=1 SV=1	8.58	21849.3	6945.33	P63001	8	43.75	0	RAC1_MOUSE	1751.05	1289.53	1608.06	1133.62	910.22	1066.89	981.43	1121.95	829.04	637.76	516.5	1048.04	1293.23	855.79		-0.610821	1.6943	0.0202161	1.80105
Vim	Vimentin OS=Mus musculus OX=10090 GN=Vim PE=1 SV=3	4.86	53744.8	760.88	P20152	3	4.72	0	VIME_MOUSE	4.68	28.73	55.11	54.93	39.9	2.11	51.74	43.33	27.81	55.97	50.7	70.66	30.91	50.03		1.41851	1.10841	0.0779101	1.8002
Ndufs1	NADH-ubiquinone oxidoreductase 75 kDa subunit_ mitochondrial OS=Mus musculus OX=10090 GN=Ndufs1 PE=1 SV=2	5.38	80803.5	3119.95	Q91VD9	30	51.99	0	NDUS1_MOUSE	975.95	961.4	875.34	829.71	811.76	896.64	1402.8	1582.05	944.52	1059.88	1084.87	1057.14	891.8	1188.54		0.39349	1.75548	0.0175599	1.79904
Mdh2	Malate dehydrogenase_ mitochondrial OS=Mus musculus OX=10090 GN=Mdh2 PE=1 SV=3	8.85	36067.7	9806.73	P08249	18	65.09	0	MDHM_MOUSE	1758.34	2022.34	902.82	1394.95	1614.36	1293.44	2614.49	2722.85	1886.09	1722.01	1828.95	2118.59	1497.71	2148.83		0.543353	1.70233	0.0198458	1.78694
Slc25a12	Calcium-binding mitochondrial carrier protein Aralar1 OS=Mus musculus OX=10090 GN=Slc25a12 PE=1 SV=1	8.31	74968.9	2971.65	Q8BH59	26	54.21	0	CMC1_MOUSE	990.69	995.19	1015	845.72	798.1	903.44	1154.94	1533.97	1043.93	1091.14	1014.63	1389.8	924.69	1204.74		0.370226	1.73537	0.0183918	1.77443
Lasp1	LIM and SH3 domain protein 1 OS=Mus musculus OX=10090 GN=Lasp1 PE=1 SV=1	6.7	30393.7	472.32	Q61792	4	19.39	0	LASP1_MOUSE	96.44	103.62	80.91	72.2	81.79	76.43	62.01	66.34	47.21	64.58	65.01	82.77	85.23	64.65		-0.405819	1.72482	0.0188444	1.77192
Ndufa2	NADH dehydrogenase [ubiquinone] 1 alpha subcomplex subunit 2 OS=Mus musculus OX=10090 GN=Ndufa2 PE=1 SV=3	10.61	11029.7	3926.35	Q9CQ75	3	30.3	0	NDUA2_MOUSE	58.61	57.85	59.01	25.84	53.4	43.2	73.86	91.22	52.86	57.37	73.84	133.58	49.65	80.46		0.679792	1.62123	0.0239204	1.75798
Ap2a1	AP-2 complex subunit alpha-1 OS=Mus musculus OX=10090 GN=Ap2a1 PE=1 SV=1	6.66	108748	421.31	P17426	12	15.76	0	AP2A1_MOUSE	335.84	424.09	387.89	375.43	296.99	316.79	468.4	565.49	391.44	377.09	454.05	559.44	356.17	469.32		0.39125	1.70534	0.0197087	1.74965
Syt5	Synaptotagmin-5 OS=Mus musculus OX=10090 GN=Syt5 PE=1 SV=1	10.09	43415	595.29	Q9R0N5	3	6.99	0	SYT5_MOUSE	1849.64	905.92	874.14	1609.23	1290.03	633.82	614.48	784.82	613.37	518.43	840.4	923.72	1193.8	715.87		-0.669493	1.60506	0.0248281	1.73909
Ckmt1	Creatine kinase U-type_ mitochondrial OS=Mus musculus OX=10090 GN=Ckmt1 PE=1 SV=1	8.16	47403	5856.88	P30275	22	62.2	0	KCRU_MOUSE	1453.79	1230.41	1466.96	1158.88	1113.79	1564.48	1851.65	2176.93	1817.13	1810.88	1265.27	1642.5	1331.38	1760.73		0.39652	1.66934	0.0214124	1.71578
Snap25	Synaptosomal-associated protein 25 OS=Mus musculus OX=10090 GN=Snap25 PE=1 SV=1	4.46	23543.3	2462.61	P60879	10	60.68	0	SNP25_MOUSE	184.9	147.51	150.69	140.21	138.96	125.68	205	206.67	161.64	176.81	172.97	185.83	147.99	184.82		0.325214	1.67784	0.0209969	1.70907
Aldh1a1	Retinal dehydrogenase 1 OS=Mus musculus OX=10090 GN=Aldh1a1 PE=1 SV=5	7.71	55095.2	3127.9	P24549	18	46.51	0	AL1A1_MOUSE	887.73	760.03	823.39	636.58	590.66	682.33	530.16	591.22	582.34	572.9	570.2	617.33	730.12	577.36		-0.325519	1.66744	0.0215062	1.69891
Atp5f1c	ATP synthase subunit gamma_ mitochondrial OS=Mus musculus OX=10090 GN=Atp5f1c PE=1 SV=1	9.48	33000	4098.52	Q91VR2	11	36.58	0	ATPG_MOUSE	445.6	381	417.6	342.61	347.22	413.19	669.96	618.24	437.28	433.63	447.6	478.31	391.21	514.17		0.378423	1.63706	0.0230645	1.68022
Mtatp8	ATP synthase protein 8 OS=Mus musculus OX=10090 GN=Mtatp8 PE=1 SV=1	10.58	7766.3	3036.34	P03930	3	32.84	0	ATP8_MOUSE	112.87	99.39	56.61	24.6	25.32	75.44	130.09	134.81	88.54	98.23	75.55	103.65	65.71	105.14		0.887142	1.42288	0.0377673	1.67679
Ndufa8	NADH dehydrogenase [ubiquinone] 1 alpha subcomplex subunit 8 OS=Mus musculus OX=10090 GN=Ndufa8 PE=1 SV=3	8.48	20448.3	1482.18	Q9DCJ5	7	52.91	0	NDUA8_MOUSE	132.03	106.79	84.57	100.86	74.13	117.68	132.35	161.56	119.54	162.71	123.4	116.99	102.68	136.09		0.419457	1.61634	0.0241915	1.66988
Plcl1	Inactive phospholipase C-like protein 1 OS=Mus musculus OX=10090 GN=Plcl1 PE=1 SV=3	5.33	124441	179.28	Q3USB7	4	5.11	0	PLCL1_MOUSE	312.7	223.33	237.98	205.8	227.57	236.75	205.03	187.32	205.71	197.45	166.64	187.59	240.69	191.63		-0.31966	1.63706	0.0230645	1.66797
Dnajc5	DnaJ homolog subfamily C member 5 OS=Mus musculus OX=10090 GN=Dnajc5 PE=1 SV=1	4.75	22899.1	961.9	P60904	3	37.37	0	DNJC5_MOUSE	83.71	89.44	99.34	85.21	75.13	74.81	117.18	143.66	80.47	112.7	103.15	106.1	84.61	110.54		0.371632	1.61516	0.0242574	1.65736
Dld	Dihydrolipoyl dehydrogenase_ mitochondrial OS=Mus musculus OX=10090 GN=Dld PE=1 SV=2	7.82	54785.7	1571.83	O08749	12	29.27	0	DLDH_MOUSE	411.55	380.75	299.62	275.1	274.33	341.25	509.75	526.72	415.59	421.61	329.05	407.54	330.43	435.04		0.397234	1.60896	0.0246058	1.65727
Ass1	Argininosuccinate synthase OS=Mus musculus OX=10090 GN=Ass1 PE=1 SV=1	8.32	46869.7	2396.98	P16460	17	38.83	0	ASSY_MOUSE	489.2	481.39	505.43	428.46	397.74	431.77	542.75	690.24	521.62	512.02	502.94	661.67	455.67	571.87		0.321115	1.62123	0.0239204	1.65273
Atp1a3	Sodium/potassium-transporting ATPase subunit alpha-3 OS=Mus musculus OX=10090 GN=Atp1a3 PE=1 SV=1	5.1	113117	18183.8	Q6PIC6	49	52.71	0	AT1A3_MOUSE	40156.7	41176.7	40264	37210.3	36525.4	31720.8	50182.6	54224.2	41183.7	46978.9	40491.1	47544.5	37842.3	46767.5		0.303351	1.62123	0.0239204	1.64937
Napg	Gamma-soluble NSF attachment protein OS=Mus musculus OX=10090 GN=Napg PE=1 SV=1	5.15	35074.6	368.14	Q9CWZ7	3	9.62	0	SNAG_MOUSE	NA	NA	NA	NA	NA	33.56	58.93	66.61	44.78	49.85	51.13	68.8	33.56	56.68		0.738552	1.47154	0.0337643	1.64648
Sept5	Septin-5 OS=Mus musculus OX=10090 GN=Sept5 PE=1 SV=2	6.24	43204.2	426.59	Q9Z2Q6	3	11.65	0	SEPT5_MOUSE	NA	63.99	70.25	58.72	43.66	44.36	73.85	61.41	70.43	67.05	86.71	96.04	56.2	75.91		0.443435	1.56703	0.0271001	1.62856
Cfl2	Cofilin-2 OS=Mus musculus OX=10090 GN=Cfl2 PE=1 SV=1	8.16	18823.7	3374.9	P45591	5	34.94	0	COF2_MOUSE	29.27	45.24	54.85	40.67	44.18	44.26	56.19	64.12	45.64	56.59	61.74	50.39	43.08	55.77		0.387567	1.56093	0.0274835	1.60832
Gls	Glutaminase kidney isoform_ mitochondrial OS=Mus musculus OX=10090 GN=Gls PE=1 SV=1	7.9	74819.3	563.65	D3Z7P3	9	17.21	0	GLSK_MOUSE	301.43	257.81	236.47	216.82	207.54	231.54	279.35	374.35	328.54	303.91	253.77	289.63	241.93	304.92		0.333828	1.56594	0.027168	1.60113
Asrgl1	Isoaspartyl peptidase/L-asparaginase OS=Mus musculus OX=10090 GN=Asrgl1 PE=1 SV=1	7.55	34406.2	353.34	Q8C0M9	4	15.34	0	ASGL1_MOUSE	69.91	61.95	68.28	57.17	60.41	53.57	47.72	50.38	47.68	55.88	48.67	55.82	61.88	51.02		-0.275427	1.56718	0.0270905	1.5912
C1qbp	Complement component 1 Q subcomponent-binding protein_ mitochondrial OS=Mus musculus OX=10090 GN=C1qbp PE=1 SV=1	4.63	31355.1	290.91	O35658	3	15.11	0	C1QBP_MOUSE	70.49	55.33	79.92	57.98	71.08	66.63	87.04	102.87	70.65	67.82	138.37	89.97	66.9	92.79		0.440254	1.52302	0.0299901	1.58538
Ndufs5	NADH dehydrogenase [ubiquinone] iron-sulfur protein 5 OS=Mus musculus OX=10090 GN=Ndufs5 PE=1 SV=3	9.41	12875.8	954.48	Q99LY9	4	41.51	0	NDUS5_MOUSE	40.61	34.88	33.5	28.52	32.26	45.15	55.62	60.63	37.03	42.75	63.23	36.5	35.82	49.29		0.440653	1.51729	0.0303884	1.57998
Rab10	Ras-related protein Rab-10 OS=Mus musculus OX=10090 GN=Rab10 PE=1 SV=1	8.58	22769.1	4898.64	P61027	8	36.5	0	RAB10_MOUSE	312.18	205.45	344.52	227.98	247.15	200.84	348.48	426.53	290.47	295.48	303.27	348.52	256.35	335.46		0.405154	1.51729	0.0303884	1.57045
Letm1	Mitochondrial proton/calcium exchanger protein OS=Mus musculus OX=10090 GN=Letm1 PE=1 SV=1	6.14	83673.1	173.08	Q9Z2I0	3	5.56	0	LETM1_MOUSE	127.96	100.4	101.94	85.07	NA	93.17	142.67	166.88	107.33	122.22	124.8	125.84	101.71	131.62		0.371606	1.51812	0.0303306	1.56294
Gpr37	Prosaposin receptor GPR37 OS=Mus musculus OX=10090 GN=Gpr37 PE=2 SV=1	8	68372.1	500.31	Q9QY42	4	10	0	GPR37_MOUSE	454.16	350.44	384.56	275.42	356.42	362.96	234.17	333.16	262.52	329.94	282.63	272.84	363.99	285.88		-0.344204	1.5081	0.0310388	1.54688
Pkm	Pyruvate kinase PKM OS=Mus musculus OX=10090 GN=Pkm PE=1 SV=4	7.23	58415.3	4307.75	P52480	24	55.18	0	KPYM_MOUSE	1241.4	977.33	986.85	827.24	970.36	868.39	1288.04	1393.1	1196.79	986.04	1145.19	1288.3	978.6	1216.24		0.317374	1.50671	0.0311381	1.53977
Ran	GTP-binding nuclear protein Ran OS=Mus musculus OX=10090 GN=Ran PE=1 SV=3	7.33	24594.2	2227.9	P62827	7	39.35	0	RAN_MOUSE	182.49	158.64	184.4	138.37	145.5	168.65	123.64	139.33	128.98	127.14	133.61	151.66	163.01	134.06		-0.277152	1.51319	0.0306768	1.53836
Ywhaz	14-3-3 protein zeta/delta OS=Mus musculus OX=10090 GN=Ywhaz PE=1 SV=1	4.53	27942.3	5753.62	P63101	12	53.88	0	1433Z_MOUSE	335.69	323.72	286.04	279.91	277.39	293.18	419.25	503.79	291.77	335.54	351.93	393.42	299.32	382.62		0.336092	1.49403	0.0320607	1.53136
Tubb4a	Tubulin beta-4A chain OS=Mus musculus OX=10090 GN=Tubb4a PE=1 SV=3	4.59	50042.1	20289.7	Q9D6F9	24	70.05	0	TBB4A_MOUSE	5366.25	6874.71	6465.84	4119.2	5175.01	5091.38	8183.58	9821.42	7751.15	5503.04	6146.61	6711.25	5515.4	7352.84		0.408274	1.47154	0.0337643	1.52713
Tppp3	Tubulin polymerization-promoting protein family member 3 OS=Mus musculus OX=10090 GN=Tppp3 PE=1 SV=1	9.68	19136.6	3453.52	Q9CRB6	8	39.77	0	TPPP3_MOUSE	163.23	174.32	138.07	122.33	94.62	130.18	109.71	98.94	69.75	88.76	126.96	113.96	137.12	101.35		-0.434346	1.46247	0.0344771	1.52561
Mgst3	Microsomal glutathione S-transferase 3 OS=Mus musculus OX=10090 GN=Mgst3 PE=1 SV=1	9.74	17128.9	863.21	Q9CPU4	2	23.53	0	MGST3_MOUSE	106.58	61.44	55.21	41.02	62.59	100.95	104.76	119.33	93.76	82.23	86.26	93.52	71.3	96.64		0.508784	1.38677	0.0410423	1.47715
Dsp	Desmoplakin OS=Mus musculus OX=10090 GN=Dsp PE=1 SV=1	6.41	335365	1615.33	E9Q557	31	12.35	0	DESP_MOUSE	440.52	563.43	3994.92	6742.22	360.49	NA	484.3	816.82	601.34	585.49	416.8	418.68	2420.32	553.9		-1.14757	0.925372	0.118749	1.47419
Opa1	Dynamin-like 120 kDa protein_ mitochondrial OS=Mus musculus OX=10090 GN=Opa1 PE=1 SV=1	7.26	111853	167.27	P58281	3	4.38	0	OPA1_MOUSE	196.98	160.55	196.74	NA	163.35	147.23	197.58	239.94	202.56	173.7	264.92	242.46	172.97	220.19		0.343213	1.41581	0.0383872	1.45682
Cldn11	Claudin-11 OS=Mus musculus OX=10090 GN=Cldn11 PE=1 SV=1	7.81	22855.7	15069.1	Q60771	3	14.49	0	CLD11_MOUSE	6980	10337	7344.98	6788.44	8933.76	7035.78	9533.37	12281.9	7563.36	11943.6	8929.03	11003.7	7903.33	10209.1		0.366711	1.40762	0.039118	1.45461
Idh3a	Isocitrate dehydrogenase [NAD] subunit alpha_ mitochondrial OS=Mus musculus OX=10090 GN=Idh3a PE=1 SV=1	6.3	40095	1754.27	Q9D6R2	14	36.07	0	IDH3A_MOUSE	429.93	343.95	384.26	362.19	299.24	441.75	522.09	645.63	470.79	477.66	335.6	497	376.89	491.46		0.3694	1.40313	0.0395253	1.45094
Mtnd1	NADH-ubiquinone oxidoreductase chain 1 OS=Mus musculus OX=10090 GN=Mtnd1 PE=1 SV=3	6.54	36116.4	310.08	P03888	3	11.01	0	NU1M_MOUSE	83.48	63.57	67.82	65.21	60.52	84.04	111.79	148.34	101.9	87.15	64.29	77.35	70.77	98.47		0.436177	1.38007	0.0416801	1.44736
Ndufa6	NADH dehydrogenase [ubiquinone] 1 alpha subcomplex subunit 6 OS=Mus musculus OX=10090 GN=Ndufa6 PE=1 SV=1	10.76	15282.9	902.76	Q9CQZ5	5	38.93	0	NDUA6_MOUSE	68.66	77.77	58.2	39.74	55.5	58.2	102.43	88.96	44.28	96.09	79.57	104.71	59.68	86.01		0.502919	1.35562	0.0440945	1.4459
Acot7	Cytosolic acyl coenzyme A thioester hydrolase OS=Mus musculus OX=10090 GN=Acot7 PE=1 SV=2	8.82	42993.2	480.85	Q91V12	6	21.52	0	BACH_MOUSE	209.13	174.54	174.43	105.17	128.13	151.02	136.68	255.22	217.38	211.34	210.32	237.09	157.07	211.34		0.437445	1.37468	0.0422008	1.4426
Ezr	Ezrin OS=Mus musculus OX=10090 GN=Ezr PE=1 SV=3	5.75	69521	1109.39	P26040	19	35.84	0	EZRI_MOUSE	287.72	271.29	263.43	233.2	196.05	242.36	300.51	352.43	235.97	271.9	365.61	380.73	249.01	317.86		0.342274	1.39083	0.0406606	1.43232
Ppp2r1a	Serine/threonine-protein phosphatase 2A 65 kDa regulatory subunit A alpha isoform OS=Mus musculus OX=10090 GN=Ppp2r1a PE=1 SV=3	4.82	66121.1	408.35	Q76MZ3	9	19.52	0	2AAA_MOUSE	234.63	232.14	222.98	208.06	214.86	207.31	285.86	318.62	221.11	263.44	226.87	291.65	220	267.92		0.273501	1.40382	0.0394617	1.43022
Pfn1	Profilin-1 OS=Mus musculus OX=10090 GN=Pfn1 PE=1 SV=2	8.46	15128.3	898.86	P62962	5	45.71	0	PROF1_MOUSE	31.21	35.93	36.2	26.31	30.4	35.78	45.91	45.14	35.73	36.43	35.7	39.77	32.64	39.78		0.286843	1.39562	0.0402145	1.42479
Fam162a	Protein FAM162A OS=Mus musculus OX=10090 GN=Fam162a PE=1 SV=1	10.52	17895.8	502.07	Q9D6U8	2	15.48	0	F162A_MOUSE	NA	19.86	NA	17.77	NA	19.44	24.69	26.8	22.34	21.09	22.29	29.32	19.02	24.42		0.352326	1.369	0.0427562	1.41361
Atp5mg	ATP synthase subunit g_ mitochondrial OS=Mus musculus OX=10090 GN=Atp5mg PE=1 SV=1	10.31	11424.5	1003.76	Q9CPQ8	3	33.98	0	ATP5L_MOUSE	87.91	66.14	84.7	28.41	54.94	64.52	98.59	99.91	73.34	83.01	80.17	90.15	64.44	87.53		0.521239	1.30788	0.0492171	1.40792
Coro1c	Coronin-1C OS=Mus musculus OX=10090 GN=Coro1c PE=1 SV=2	6.71	53805.3	1102.39	Q9WUM4	12	28.27	0	COR1C_MOUSE	457.83	362.6	465.6	395.33	295.15	348.54	193.39	277.84	217.9	292.72	328.26	448.74	387.51	293.14		-0.43974	1.32486	0.0473302	1.39593
Gna11	Guanine nucleotide-binding protein subunit alpha-11 OS=Mus musculus OX=10090 GN=Gna11 PE=1 SV=1	5.62	42309.4	855	P21278	12	39.83	0	GNA11_MOUSE	153.81	128.1	155.81	132.39	120.08	128.49	122.89	139.8	99.67	91.36	96.28	119.41	136.45	111.57		-0.300304	1.35058	0.0446088	1.38356
Lrrc57	Leucine-rich repeat-containing protein 57 OS=Mus musculus OX=10090 GN=Lrrc57 PE=1 SV=1	8.4	27159.4	536.99	Q9D1G5	6	26.78	0	LRC57_MOUSE	115.87	90.62	105.83	88.9	79.14	90.29	72.66	79.69	63.91	61.41	79.21	101.28	95.11	76.36		-0.32551	1.34373	0.0453183	1.38259
Rab5a	Ras-related protein Rab-5A OS=Mus musculus OX=10090 GN=Rab5a PE=1 SV=1	8.25	23826.8	2022	Q9CQD1	8	53.49	0	RAB5A_MOUSE	113.21	102.81	112.45	94.75	87.53	95.39	93.99	104.09	81.4	76.39	70.48	72.79	101.02	83.19		-0.28836	1.35044	0.0446235	1.38088
Basp1	Brain acid soluble protein 1 OS=Mus musculus OX=10090 GN=Basp1 PE=1 SV=3	4.28	22086.6	6519.54	Q91XV3	11	78.32	0	BASP1_MOUSE	465.06	565.8	506.08	469.45	350.34	429.16	364.48	425.02	290.91	346.76	350.86	449.3	464.31	371.22		-0.321977	1.3378	0.0459411	1.376
Ahcyl1	S-adenosylhomocysteine hydrolase-like protein 1 OS=Mus musculus OX=10090 GN=Ahcyl1 PE=1 SV=1	6.51	60035.1	349.55	Q80SW1	6	12.83	0	SAHH2_MOUSE	69.06	82.74	69.49	66.6	64.78	76.38	115.11	100.52	69.55	82.59	77.07	90.44	71.51	89.21		0.303999	1.33914	0.0457991	1.37322
Mag	Myelin-associated glycoprotein OS=Mus musculus OX=10090 GN=Mag PE=1 SV=2	4.85	70115.2	4711.08	P20917	15	30.83	0	MAG_MOUSE	19116	16056.7	14856	15044.6	12861.6	11354.6	12678.3	13453.1	8857.94	12994.4	11981	10687.2	14881.6	11775.3		-0.332455	1.32509	0.0473058	1.36615
Eno2	Gamma-enolase OS=Mus musculus OX=10090 GN=Eno2 PE=1 SV=2	4.8	47638.9	4129.03	P17183	17	60.37	0	ENOG_MOUSE	461.39	598.47	550.28	902.51	513.74	396.79	606.58	746.5	692.23	705.9	683.14	1143.74	570.53	763.02		0.438106	1.29237	0.0510069	1.36461
Hsp90ab1	Heat shock protein HSP 90-beta OS=Mus musculus OX=10090 GN=Hsp90ab1 PE=1 SV=3	4.78	83623.5	1914.31	P11499	21	36.33	0	HS90B_MOUSE	403.3	380.5	406.72	317.18	315.14	339.19	432.16	489.21	404.56	422.67	367.98	473.16	360.34	431.62		0.262114	1.33914	0.0457991	1.36455
Dctn2	Dynactin subunit 2 OS=Mus musculus OX=10090 GN=Dctn2 PE=1 SV=3	4.97	44231	459.95	Q99KJ8	8	26.87	0	DCTN2_MOUSE	491.39	679.33	1626.07	4458.03	295.93	313.69	541.77	115.91	501.18	616.36	445.49	391.15	1310.74	435.31		-1.00905	0.915295	0.121536	1.36233
Cs	Citrate synthase_ mitochondrial OS=Mus musculus OX=10090 GN=Cs PE=1 SV=1	8.76	52021.9	1732.85	Q9CZU6	14	34.05	0	CISY_MOUSE	733.72	665.01	574.94	522.92	684.03	635.8	1015.08	1107.99	665.75	788.84	625.46	739.85	636.07	823.83		0.349836	1.3102	0.0489548	1.35611
Dnajb2	DnaJ homolog subfamily B member 2 OS=Mus musculus OX=10090 GN=Dnajb2 PE=1 SV=3	5.55	35650.4	319.78	Q9QYI5	3	10.49	0	DNJB2_MOUSE	51.93	54.65	58.95	50.49	44.52	48.57	68.81	91.25	58.19	61.11	44.97	77.85	51.52	67.03		0.349581	1.29908	0.0502247	1.3453
Mtco2	Cytochrome c oxidase subunit 2 OS=Mus musculus OX=10090 GN=Mtco2 PE=1 SV=1	4.41	26147.6	3769.8	P00405	6	30.84	0	COX2_MOUSE	1149.28	1475.8	924.67	830.06	752.75	1064.27	1592.26	2360.01	1827.43	1243.37	1073.06	911.56	1032.8	1501.28		0.500241	1.24857	0.0564193	1.34506
Cox5a	Cytochrome c oxidase subunit 5A_ mitochondrial OS=Mus musculus OX=10090 GN=Cox5a PE=1 SV=2	6.12	16329.6	1875.51	P12787	5	37.67	0	COX5A_MOUSE	37.71	44.77	36.76	46.2	106.18	65.82	124.65	161.04	49.64	99.19	57.92	56.85	56.24	91.55		0.670267	1.16394	0.0685578	1.34314
Rab11b	Ras-related protein Rab-11B OS=Mus musculus OX=10090 GN=Rab11b PE=1 SV=3	5.56	24603.6	438.31	P46638	4	20.18	0	RB11B_MOUSE	46.61	31.93	51.22	37.98	35.49	40.61	56.46	49.12	50.73	42.53	51.31	45.84	40.64	49.33		0.292327	1.30396	0.0496635	1.33633
Anln	Anillin OS=Mus musculus OX=10090 GN=Anln PE=1 SV=2	6.59	124277	735.89	Q8K298	26	31.67	0	ANLN_MOUSE	878.96	807	743.57	587.92	668.07	856.09	581.67	793.02	574.96	580.21	554.58	610.74	756.94	615.86		-0.294445	1.30107	0.0499955	1.33397
Stxbp3	Syntaxin-binding protein 3 OS=Mus musculus OX=10090 GN=Stxbp3 PE=1 SV=1	7.97	68855.1	354.43	Q60770	8	16.22	0	STXB3_MOUSE	253.31	252.59	242.41	203.09	200.49	187.88	208.63	234.86	153.88	164.33	178.94	146.4	223.3	181.18		-0.311679	1.29237	0.0510069	1.32942
Tufm	Elongation factor Tu_ mitochondrial OS=Mus musculus OX=10090 GN=Tufm PE=1 SV=1	7.34	49907.6	2051.85	Q8BFR5	18	52.43	0	EFTU_MOUSE	399.24	338.17	312.48	276.52	294.95	266.85	411.84	473.36	316.5	406.31	321.37	400.46	314.7	388.31		0.302175	1.29237	0.0510069	1.32723
Ywhab	14-3-3 protein beta/alpha OS=Mus musculus OX=10090 GN=Ywhab PE=1 SV=3	4.57	28200.5	3297.44	Q9CQV8	9	45.12	0	1433B_MOUSE	104.36	100.78	113.2	81.61	102.62	103.47	106.17	142.59	103.92	118.83	124.02	132.03	101.01	121.26		0.261511	1.30077	0.05003	1.3268
Atp1b1	Sodium/potassium-transporting ATPase subunit beta-1 OS=Mus musculus OX=10090 GN=Atp1b1 PE=1 SV=1	8.82	35593.8	11851.6	P14094	14	44.08	0	AT1B1_MOUSE	8809.17	8092.11	8888.25	8393.75	6823.24	7084.6	10429.3	12503.3	7824.74	9053.32	9288.14	9682.7	8015.19	9796.91		0.282035	1.29237	0.0510069	1.32279
Rab8a	Ras-related protein Rab-8A OS=Mus musculus OX=10090 GN=Rab8a PE=1 SV=2	9.55	23839.3	2755.16	P55258	3	13.53	0	RAB8A_MOUSE	18.7	6.03	11.62	11.36	6.95	6.89	6.21	14	4.98	4.09	5.02	5.51	10.26	6.63		-0.643856	1.15117	0.0706036	1.319
Pllp	Plasmolipin OS=Mus musculus OX=10090 GN=Pllp PE=1 SV=1	9.6	19915.6	1945.02	Q9DCU2	2	21.43	0	PLLP_MOUSE	814.74	547.67	842.03	541.77	705.49	573.29	732.97	599.32	513.51	477.65	342.74	409.73	670.83	512.65		-0.407312	1.24861	0.0564147	1.31336
Lpar1	Lysophosphatidic acid receptor 1 OS=Mus musculus OX=10090 GN=Lpar1 PE=1 SV=1	8.48	41746.7	302.19	P61793	2	5.49	0	LPAR1_MOUSE	168.14	116.6	119.56	152.57	98.1	135.89	223.81	160.9	115.1	141.28	196.54	215.87	131.81	175.58		0.396945	1.24695	0.0566303	1.30861
Myl12b	Myosin regulatory light chain 12B OS=Mus musculus OX=10090 GN=Myl12b PE=1 SV=2	4.49	19836.2	792.81	Q3THE2	6	44.19	0	ML12B_MOUSE	82.71	75.01	67.68	52.57	42.3	57.38	46.06	53.76	44.51	44.3	49.61	54.86	62.94	48.85		-0.335242	1.2359	0.0580897	1.28056
Cd82	CD82 antigen OS=Mus musculus OX=10090 GN=Cd82 PE=1 SV=1	4.76	30312.9	2229.18	P40237	5	19.55	0	CD82_MOUSE	709.02	849.82	957.09	479.74	684.99	774.93	594.09	681.28	517.68	487.14	463.66	704.01	742.6	574.64		-0.356675	1.20572	0.0622704	1.25737
Cox4i1	Cytochrome c oxidase subunit 4 isoform 1_ mitochondrial OS=Mus musculus OX=10090 GN=Cox4i1 PE=1 SV=2	9.71	19587.5	7688.98	P19783	7	40.83	0	COX41_MOUSE	431.23	539.38	425.08	348.83	401.72	440.84	580.23	573.84	496.16	643.73	344.54	740.97	431.18	563.25		0.358693	1.2047	0.0624166	1.25697
Apoo	MICOS complex subunit Mic26 OS=Mus musculus OX=10090 GN=Apoo PE=1 SV=2	9.61	22718.1	804.85	Q9DCZ4	3	18.18	0	MIC26_MOUSE	70.08	73.98	38.96	63.5	60.01	47.54	83.93	69.88	65.5	66.67	65.35	93.25	59.01	74.1		0.348776	1.2047	0.0624166	1.25417
Ndrg1	Protein NDRG1 OS=Mus musculus OX=10090 GN=Ndrg1 PE=1 SV=1	5.68	43465	5552.26	Q62433	12	53.81	0	NDRG1_MOUSE	1435.2	1369.09	1232.89	1021.99	1119.22	1087.6	1118.89	1365.27	931.09	811.73	859.87	839.67	1211	987.75		-0.309022	1.2047	0.0624166	1.2437
Arf6	ADP-ribosylation factor 6 OS=Mus musculus OX=10090 GN=Arf6 PE=1 SV=2	9.35	20196.2	5643.29	P62331	8	63.43	0	ARF6_MOUSE	208.16	214.96	273.44	184.24	178.25	236.27	158.64	208.9	157.86	146.38	175.68	211.2	215.89	176.44		-0.29007	1.2047	0.0624166	1.23913
Slc2a3	Solute carrier family 2_ facilitated glucose transporter member 3 OS=Mus musculus OX=10090 GN=Slc2a3 PE=1 SV=1	4.75	53992.3	201.9	P32037	3	6.9	0	GTR3_MOUSE	139.58	151.78	136.03	136.51	123.8	112.61	185.2	154.32	137.6	149.54	148.24	165.08	133.39	156.66		0.231962	1.20701	0.0620854	1.2291
Hspa9	Stress-70 protein_ mitochondrial OS=Mus musculus OX=10090 GN=Hspa9 PE=1 SV=3	5.72	73746.5	726.22	P38647	18	35.49	0	GRP75_MOUSE	263.97	247.1	211.15	204.83	445.56	506.87	333.81	299.43	708.47	544.22	351.55	414.53	313.25	442		0.523325	1.10426	0.0786568	1.22199
Src	Neuronal proto-oncogene tyrosine-protein kinase Src OS=Mus musculus OX=10090 GN=Src PE=1 SV=4	7.79	61158.1	207.15	P05480	3	6.28	0	SRC_MOUSE	125.02	103.35	121.2	132.91	77.12	86.1	71.74	125.62	63.48	76.67	70.03	93.69	107.62	83.54		-0.377294	1.15445	0.0700721	1.21454
Rras	Ras-related protein R-Ras OS=Mus musculus OX=10090 GN=Rras PE=1 SV=1	6.4	23935	1899.93	P10833	3	18.35	0	RRAS_MOUSE	205.39	233.91	654.73	1564.16	148.44	165.76	207.85	266.41	165.45	177.81	153.81	181.21	495.4	192.09		-0.789463	0.915295	0.121536	1.20873
Rab3a	Ras-related protein Rab-3A OS=Mus musculus OX=10090 GN=Rab3a PE=1 SV=1	4.66	25198	5549.24	P63011	8	41.82	0	RAB3A_MOUSE	228.03	214.86	213.33	185.2	148.55	181.18	188.12	287.54	224.11	238.34	219.8	257.56	195.19	235.91		0.275097	1.15942	0.0692762	1.19161
Uqcrq	Cytochrome b-c1 complex subunit 8 OS=Mus musculus OX=10090 GN=Uqcrq PE=1 SV=3	10.71	9768.27	3264.58	Q9CQ69	4	48.78	0	QCR8_MOUSE	45.08	51.93	40.53	23.58	37.93	39.33	68.98	86.08	55.76	40.53	42.21	36.99	39.73	55.09		0.441703	1.08042	0.0830955	1.16723
Gdi1	Rab GDP dissociation inhibitor alpha OS=Mus musculus OX=10090 GN=Gdi1 PE=1 SV=3	4.77	51092	3165.03	P50396	20	57.49	0	GDIA_MOUSE	328.09	299.05	312.43	266.36	251.45	276.03	354.45	430.33	284.15	329.75	297.37	368.52	288.9	344.09		0.244428	1.12748	0.0745624	1.15367
Pdia3	Protein disulfide-isomerase A3 OS=Mus musculus OX=10090 GN=Pdia3 PE=1 SV=2	5.83	57134.7	797.98	P27773	12	33.07	0	PDIA3_MOUSE	193.13	156.37	201.13	180.69	174.5	163.25	221.74	267.56	213.56	206.13	179.24	180.82	178.18	211.51		0.239481	1.12382	0.0751932	1.14905
Abat	4-aminobutyrate aminotransferase_ mitochondrial OS=Mus musculus OX=10090 GN=Abat PE=1 SV=1	8.02	57136.3	1034.63	P61922	16	47.8	0	GABT_MOUSE	550.64	682.49	2478.58	4526.3	340.87	384.96	586.32	677.41	469.14	430.58	522.14	486.04	1493.97	528.6		-0.794003	0.823413	0.150171	1.14388
Glul	Glutamine synthetase OS=Mus musculus OX=10090 GN=Glul PE=1 SV=6	6.69	42861.1	13778.7	P15105	16	62.2	0	GLNA_MOUSE	4851.4	5151.91	4480.93	3799.46	3373.68	4625.9	5088.66	6554.8	4523.57	4596.07	5161.16	5524.76	4380.55	5241.5		0.262358	1.11066	0.0775062	1.14123
Ube2i	SUMO-conjugating enzyme UBC9 OS=Mus musculus OX=10090 GN=Ube2i PE=1 SV=1	8.91	18235	510.14	P63280	3	26.58	0	UBC9_MOUSE	46.39	43.67	46.07	39.44	30.98	40.74	34.44	40.63	33.15	33.18	30.92	36.64	41.22	34.83		-0.235636	1.09992	0.0794479	1.12487
Hint3	Histidine triad nucleotide-binding protein 3 OS=Mus musculus OX=10090 GN=Hint3 PE=1 SV=1	5.9	19129.7	604.47	Q9CPS6	3	35.76	0	HINT3_MOUSE	34.51	26.37	25.19	NA	25.22	28.47	29.25	46.52	36.75	33.63	28.01	31.94	27.95	34.35		0.286626	1.08042	0.0830955	1.1178
Ina	Alpha-internexin OS=Mus musculus OX=10090 GN=Ina PE=1 SV=3	5.2	55553.7	4499.75	P46660	32	63.87	0	AINX_MOUSE	744.13	692.24	674.9	727.17	532.01	568.58	628.25	813.47	654.19	663.17	1160.18	1543.67	656.5	910.49		0.396079	1.03726	0.0917782	1.11031
Rab31	Ras-related protein Rab-31 OS=Mus musculus OX=10090 GN=Rab31 PE=1 SV=1	7.19	21673.7	795.08	Q921E2	7	46.39	0	RAB31_MOUSE	51.86	169.01	52.94	147.61	91.36	138.14	150.73	141.06	99.24	145.51	154.09	151.28	108.49	140.32		0.508266	0.986177	0.103234	1.10945
Fam49b	Protein FAM49B OS=Mus musculus OX=10090 GN=Fam49b PE=1 SV=1	5.7	37061.2	289.91	Q921M7	2	9.88	0	FA49B_MOUSE	66.33	57.2	48.89	56.54	55.82	54.05	NA	62.66	36.92	48.09	37.75	NA	56.47	46.35		-0.313054	1.06001	0.0870943	1.10527
Ermn	Ermin OS=Mus musculus OX=10090 GN=Ermn PE=1 SV=1	4.34	32319	3640.8	Q5EBJ4	10	47.33	0	ERMIN_MOUSE	463.32	408.09	280.55	259.48	330.41	356.01	339.6	262.04	259.1	273.44	266.08	304.27	349.64	284.09		-0.277564	1.0556	0.0879838	1.09148
Cab39	Calcium-binding protein 39 OS=Mus musculus OX=10090 GN=Cab39 PE=1 SV=2	6.49	40014.1	517.18	Q06138	8	23.17	0	CAB39_MOUSE	6108.81	7669.5	127.05	96.61	4872.65	5170.24	7701.69	90.63	88.05	82.63	6283.29	7521.77	4007.48	3628.01		-0.985928	0.44275	0.360787	1.08078
Cacybp	Calcyclin-binding protein OS=Mus musculus OX=10090 GN=Cacybp PE=1 SV=1	8.14	26624.3	744.44	Q9CXW3	6	40.17	0	CYBP_MOUSE	95.98	81.42	67.52	48.18	60.51	68.67	80.51	92.1	84.62	66.14	81.62	118.09	70.38	87.18		0.320151	1.0299	0.0933472	1.07851
Aldh1b1	Aldehyde dehydrogenase X_ mitochondrial OS=Mus musculus OX=10090 GN=Aldh1b1 PE=1 SV=1	6.64	58123.3	243.49	Q9CZS1	3	7.51	0	AL1B1_MOUSE	111.02	112.03	105.46	113.52	60.08	49.13	20.62	48.63	83.48	70.07	74.85	93.89	91.87	65.26		-0.569076	0.915295	0.121536	1.07778
Cyb5b	Cytochrome b5 type B OS=Mus musculus OX=10090 GN=Cyb5b PE=1 SV=1	4.6	16375	640.16	Q9CQX2	3	40.41	0	CYB5B_MOUSE	63.41	67.71	70.15	109.78	18.65	49.6	74.36	116.99	79.86	87.77	83.97	58.07	63.22	83.5		0.546854	0.920783	0.12001	1.07093
Hpcal1	Hippocalcin-like protein 1 OS=Mus musculus OX=10090 GN=Hpcal1 PE=1 SV=2	5.2	22452.3	958.67	P62748	6	31.61	0	HPCL1_MOUSE	86.99	63.43	62.54	31.68	42.04	40.95	40.03	43.79	28.68	29.14	52.4	43.25	54.6	39.55		-0.417166	0.986177	0.103234	1.07078
Ehd4	EH domain-containing protein 4 OS=Mus musculus OX=10090 GN=Ehd4 PE=1 SV=1	6.35	61708.8	570.62	Q9EQP2	9	18.67	0	EHD4_MOUSE	100.6	60.63	73.86	75.22	35.69	49.99	11.95	70.48	28.97	50.55	55.17	68.8	66	47.65		-0.615145	0.875799	0.133107	1.07025
Cd9	CD9 antigen OS=Mus musculus OX=10090 GN=Cd9 PE=1 SV=2	6.98	25828.3	2196.41	P40240	5	30.97	0	CD9_MOUSE	420.07	453.1	618.73	473.15	427.82	409.96	521.53	483.72	291.99	180.29	316.36	431.36	467.14	370.87		-0.405156	0.986177	0.103234	1.06616
Nme2	Nucleoside diphosphate kinase B OS=Mus musculus OX=10090 GN=Nme2 PE=1 SV=1	7.38	17477.2	16113.7	Q01768	12	79.61	0	NDKB_MOUSE	1931.34	2232.46	1590.88	1484.9	1399.42	1745.57	1236.3	1935.9	1063.38	1364.43	1255.96	1656.19	1730.76	1418.69		-0.297384	1.02377	0.0946733	1.06609
Kcna1	Potassium voltage-gated channel subfamily A member 1 OS=Mus musculus OX=10090 GN=Kcna1 PE=1 SV=1	4.86	56865.8	1083.85	P16388	15	36.36	0	KCNA1_MOUSE	286.56	224.92	323.22	224.85	182.48	203.22	336.5	362.44	251.97	206.45	313.03	314.76	240.87	297.53		0.307906	1.00153	0.0996492	1.04779
Atp12a	Potassium-transporting ATPase alpha chain 2 OS=Mus musculus OX=10090 GN=Atp12a PE=1 SV=3	5.93	115468	961.42	Q9Z1W8	7	5.89	0	AT12A_MOUSE	795.96	907.53	611.49	812.6	662.82	719.38	771.95	834.55	856.92	881.65	827.06	1111.78	751.63	880.65		0.23113	1.02136	0.095201	1.04718
Gpi	Glucose-6-phosphate isomerase OS=Mus musculus OX=10090 GN=Gpi PE=1 SV=4	8.22	62995.2	4254.24	P06745	24	48.03	0	G6PI_MOUSE	4543.71	3627.63	2720.99	2130.98	2029.97	2329.93	1883.29	2092.98	2448.6	1736.43	2550.85	2477.35	2897.2	2198.25		-0.348937	0.986177	0.103234	1.04609
Dnm3	Dynamin-3 OS=Mus musculus OX=10090 GN=Dnm3 PE=1 SV=1	8.5	97589.8	1070.64	Q8BZ98	23	29.32	0	DYN3_MOUSE	566.58	418.31	1221.08	1361.04	325.17	358.61	490.04	553.93	354.24	350.06	365.55	400.54	708.47	419.06		-0.536706	0.894708	0.127436	1.04334
Pfn2	Profilin-2 OS=Mus musculus OX=10090 GN=Pfn2 PE=1 SV=3	6.79	15374.4	886.42	Q9JJV2	3	25.71	0	PROF2_MOUSE	28.45	32.29	30.72	32.02	18.78	28.63	47.24	32.15	30.33	28.68	35.56	33.85	28.48	34.63		0.285106	1.00361	0.099172	1.04332
Tnr	Tenascin-R OS=Mus musculus OX=10090 GN=Tnr PE=1 SV=2	4.65	151928	333.14	Q8BYI9	11	10.38	0	TENR_MOUSE	654.43	591.07	660.98	590.36	365.08	499.85	493.17	501.21	377.54	422.15	419.24	526.86	560.3	456.7		-0.277066	1.00361	0.099172	1.04115
Jup	Junction plakoglobin OS=Mus musculus OX=10090 GN=Jup PE=1 SV=3	5.72	82542.3	2013.7	Q02257	20	31.28	0	PLAK_MOUSE	177.12	180.2	800.67	1444.76	170.3	100.51	176.24	296.14	172.49	190.35	115.84	157.02	478.93	184.68		-0.723607	0.739839	0.182038	1.03488
Chchd6	MICOS complex subunit Mic25 OS=Mus musculus OX=10090 GN=Chchd6 PE=1 SV=2	8.52	30194.1	259.01	Q91VN4	3	14.65	0	MIC25_MOUSE	59.07	64.11	68.38	59.8	39.78	39.35	67.33	91.1	45.76	62.44	64.29	87.5	55.08	69.74		0.337339	0.973813	0.106215	1.03059
Rab5b	Ras-related protein Rab-5B OS=Mus musculus OX=10090 GN=Rab5b PE=1 SV=1	8.24	23935	1437.53	P61021	7	42.33	0	RAB5B_MOUSE	94.17	70.55	97.94	63.67	74.09	79.45	82.29	55.86	71.35	68.99	63.91	61.53	79.98	67.32		-0.242431	0.998899	0.100254	1.0279
Dynll2	Dynein light chain 2_ cytoplasmic OS=Mus musculus OX=10090 GN=Dynll2 PE=1 SV=1	7.26	10463.9	17060.6	Q9D0M5	5	62.92	0	DYL2_MOUSE	139.48	354.17	240.95	344.84	332.17	222.88	272.23	210.09	233.75	69.64	234.11	173.69	272.41	198.92		-0.50081	0.888236	0.129349	1.01969
Qdpr	Dihydropteridine reductase OS=Mus musculus OX=10090 GN=Qdpr PE=1 SV=2	7.85	25798.4	10520.8	Q8BVI4	13	68.88	0	DHPR_MOUSE	698.19	659.57	689.44	585.3	609.41	753.39	687.29	1002.74	717.02	699.54	754.8	782.25	665.88	773.94		0.20973	0.995665	0.101003	1.01751
Nsf	Vesicle-fusing ATPase OS=Mus musculus OX=10090 GN=Nsf PE=1 SV=2	6.55	83183.9	3426.4	P46460	34	49.73	0	NSF_MOUSE	1042.05	812.27	3172.98	2662.77	817.4	944.19	3559.03	1298.44	988.9	3354.95	3721.37	1310.11	1575.28	2372.13		0.626581	0.80071	0.15823	1.01673
Ndufs8	NADH dehydrogenase [ubiquinone] iron-sulfur protein 8_ mitochondrial OS=Mus musculus OX=10090 GN=Ndufs8 PE=1 SV=1	5.85	24494.6	965.57	Q8K3J1	5	25.47	0	NDUS8_MOUSE	103.64	112.25	104.18	87.01	84.98	99.97	134.59	144.55	95.43	128.69	103.2	97.19	98.67	117.27		0.236581	0.986177	0.103234	1.01416
Slc2a1	Solute carrier family 2_ facilitated glucose transporter member 1 OS=Mus musculus OX=10090 GN=Slc2a1 PE=1 SV=4	9.08	54326.9	359.25	P17809	3	4.88	0	GTR1_MOUSE	265.33	210.6	216.16	202.94	186.17	280.33	193.39	221.44	149.83	174.64	170.06	237.32	226.92	191.11		-0.250029	0.973813	0.106215	1.0054
Gpd2	Glycerol-3-phosphate dehydrogenase_ mitochondrial OS=Mus musculus OX=10090 GN=Gpd2 PE=1 SV=2	6.18	81467.1	246.36	Q64521	5	7.15	0	GPDM_MOUSE	132.22	133.41	105.09	102	97.16	102.47	119.04	130.12	112.47	125.98	142.86	142.07	112.06	128.76		0.207098	0.980011	0.10471	1.00165
Atp2b2	Plasma membrane calcium-transporting ATPase 2 OS=Mus musculus OX=10090 GN=Atp2b2 PE=1 SV=2	5.61	133785	831.22	Q9R0K7	31	29.97	0	AT2B2_MOUSE	962.57	900.9	988.43	818.53	681.03	755.72	1049.61	1210.89	843.7	848.35	971	1046.32	851.2	994.98		0.225981	0.973813	0.106215	0.99969
Lancl2	LanC-like protein 2 OS=Mus musculus OX=10090 GN=Lancl2 PE=1 SV=1	6.97	51518.7	274.42	Q9JJK2	2	5.56	0	LANC2_MOUSE	112.16	98.68	135.98	93.66	63.06	69.88	77.02	NA	NA	64.83	71.27	NA	95.57	71.04		-0.382371	0.912734	0.122255	0.989591
Baiap2	Brain-specific angiogenesis inhibitor 1-associated protein 2 OS=Mus musculus OX=10090 GN=Baiap2 PE=1 SV=2	9.47	59465.1	582.08	Q8BKX1	14	33.46	0	BAIP2_MOUSE	378.75	253.21	274.57	258.69	251.27	254.2	324.87	320.79	308.26	282.36	315.09	358.63	278.45	318.33		0.206042	0.948179	0.112673	0.970308
Slc6a11	Sodium- and chloride-dependent GABA transporter 3 OS=Mus musculus OX=10090 GN=Slc6a11 PE=1 SV=2	6.65	71386.8	259.64	P31650	7	11.16	0	S6A11_MOUSE	286.45	211.77	233.75	152.92	178.14	252.99	228.64	255.32	239.58	237.42	264.81	330.41	219.34	259.36		0.261989	0.926364	0.118478	0.962698
Bin1	Myc box-dependent-interacting protein 1 OS=Mus musculus OX=10090 GN=Bin1 PE=1 SV=1	4.77	64698.3	1144.27	O08539	16	36.9	0	BIN1_MOUSE	746.09	821.08	727.92	685	478.24	671.88	552.54	675.59	506.28	558.15	581.16	626.27	688.37	583.33		-0.225693	0.935222	0.116085	0.96207
Syn2	Synapsin-2 OS=Mus musculus OX=10090 GN=Syn2 PE=1 SV=2	8.58	63657.8	3528.27	Q64332	15	39.59	0	SYN2_MOUSE	1209.34	1397.84	1085.09	785.84	765.52	887.89	725.07	932.28	724.77	730.01	849.52	1029.84	1021.92	831.92		-0.274459	0.922056	0.119659	0.962037
Ptprd	Receptor-type tyrosine-protein phosphatase delta OS=Mus musculus OX=10090 GN=Ptprd PE=1 SV=3	6.13	215607	145.21	Q64487	6	4.39	0	PTPRD_MOUSE	367.55	367.5	388.12	325.54	329.05	330.07	324.81	421.87	266.05	279.38	281.07	265.66	351.3	306.47		-0.214212	0.935222	0.116085	0.959441
Slc3a2	4F2 cell-surface antigen heavy chain OS=Mus musculus OX=10090 GN=Slc3a2 PE=1 SV=1	5.54	58450.7	547.93	P10852	8	19.01	0	4F2_MOUSE	223.52	185.21	231.78	204.87	176.23	177.84	251.15	284.17	188.39	220.01	197.99	258.15	199.91	233.31		0.21586	0.926364	0.118478	0.951181
Sucla2	Succinate--CoA ligase [ADP-forming] subunit beta_ mitochondrial OS=Mus musculus OX=10090 GN=Sucla2 PE=1 SV=2	6.65	50456.2	956.43	Q9Z2I9	17	39.31	0	SUCB1_MOUSE	351.99	282.15	235.03	212.7	221.18	215.87	306.12	338.04	317.16	301.18	279.95	229.63	253.15	295.35		0.237094	0.915295	0.121536	0.945504
Mapk1	Mitogen-activated protein kinase 1 OS=Mus musculus OX=10090 GN=Mapk1 PE=1 SV=3	6.57	41674.9	522.43	P63085	8	24.86	0	MK01_MOUSE	160.78	141.4	106.77	108.32	128.08	139.52	143.17	173.45	115.64	149.78	157.76	178.05	130.81	152.98		0.227093	0.915295	0.121536	0.943046
Rab3c	Ras-related protein Rab-3C OS=Mus musculus OX=10090 GN=Rab3c PE=1 SV=1	4.91	26100.3	2212.95	P62823	7	32.6	0	RAB3C_MOUSE	63.65	69.1	70.47	47.38	48.51	51.59	33.38	51.92	47.91	49.61	50.53	61.25	58.45	49.1		-0.254571	0.907644	0.123696	0.942668
Hspa8	Heat shock cognate 71 kDa protein OS=Mus musculus OX=10090 GN=Hspa8 PE=1 SV=1	5.2	71099.3	6372.91	P63017	28	57.74	0	HSP7C_MOUSE	1842.66	1968.56	1935.68	1645.94	1573.26	1782.39	2438.5	2498.89	1668.48	1938.1	1774.56	2189.19	1791.42	2084.62		0.206677	0.918314	0.120694	0.941284
Rab1A	Ras-related protein Rab-1A OS=Mus musculus OX=10090 GN=Rab1A PE=1 SV=3	5.86	22905.9	4987.97	P62821	11	63.41	0	RAB1A_MOUSE	229.49	209.26	205.52	161.15	143.46	177.21	203.92	259.7	189.22	198.6	214.25	236.35	187.68	217		0.21958	0.915295	0.121536	0.941265
Ap2m1	AP-2 complex subunit mu OS=Mus musculus OX=10090 GN=Ap2m1 PE=1 SV=1	10.07	49996.9	350.07	P84091	4	14.94	0	AP2M1_MOUSE	125.41	128.36	139.69	137.28	117.85	119.37	107.27	149.41	110.98	85.54	112.06	108.08	127.99	112.22		-0.206121	0.915295	0.121536	0.938217
Hsp90aa1	Heat shock protein HSP 90-alpha OS=Mus musculus OX=10090 GN=Hsp90aa1 PE=1 SV=4	4.74	85187.2	1791.82	P07901	21	35.06	0	HS90A_MOUSE	497.13	446.64	473.26	336.59	375.02	412.67	570.8	588.72	463.03	391.84	469.32	469.33	423.55	492.17		0.215799	0.909904	0.123054	0.935144
Ppia	Peptidyl-prolyl cis-trans isomerase A OS=Mus musculus OX=10090 GN=Ppia PE=1 SV=2	8	18142.5	11615.2	P17742	10	68.29	0	PPIA_MOUSE	1475.58	1579.67	1514.03	1339.14	1104.09	1278.14	1310.72	1259.01	1196.38	1249.59	1145.1	1114.55	1381.78	1212.56		-0.180466	0.916638	0.121161	0.934234
Actr3	Actin-related protein 3 OS=Mus musculus OX=10090 GN=Actr3 PE=1 SV=3	5.53	47813.4	320.02	Q99JY9	4	16.03	0	ARP3_MOUSE	76.22	55.65	72.38	56.85	75.55	74.62	69.53	88.69	66.86	83.35	80.46	81.68	68.55	78.43		0.199782	0.911874	0.122497	0.933503
Vdac3	Voltage-dependent anion-selective channel protein 3 OS=Mus musculus OX=10090 GN=Vdac3 PE=1 SV=1	9.06	31094.9	3976.15	Q60931	12	50.53	0	VDAC3_MOUSE	376.12	439.03	273.72	305.81	354	330.76	441.92	618.14	268.35	442.59	382.51	418.46	346.57	428.66		0.280335	0.888236	0.129349	0.931425
Dnm1l	Dynamin-1-like protein OS=Mus musculus OX=10090 GN=Dnm1l PE=1 SV=2	6.66	83171.4	210.19	Q8K1M6	3	4.85	0	DNM1L_MOUSE	118.63	123.13	110.97	109.23	NA	84.45	107.73	121.39	102.31	140.89	139.22	175.96	109.28	131.25		0.251795	0.892948	0.127953	0.92777
Pex5l	PEX5-related protein OS=Mus musculus OX=10090 GN=Pex5l PE=1 SV=2	5.04	63419.9	431.65	Q8C437	8	19.22	0	PEX5R_MOUSE	182.57	146.46	156.55	143.9	134.96	150.29	212.83	218.16	155.07	194.26	135.24	158.37	152.46	178.99		0.215648	0.888236	0.129349	0.91404
Myadm	Myeloid-associated differentiation marker OS=Mus musculus OX=10090 GN=Myadm PE=1 SV=2	8.23	36026	405.99	O35682	4	15.63	0	MYADM_MOUSE	129.14	103.88	124.07	79.69	106.16	111.5	129.8	131.88	107.33	118.86	132.91	123.09	109.07	123.98		0.197706	0.888236	0.129349	0.909973
Padi2	Protein-arginine deiminase type-2 OS=Mus musculus OX=10090 GN=Padi2 PE=1 SV=2	5.22	76991.1	715.73	Q08642	16	29.12	0	PADI2_MOUSE	444.84	457.98	538.8	332.79	357.64	348	452.46	654.87	423.67	445.24	445.03	474.07	413.34	482.56		0.229166	0.865548	0.136286	0.895372
Mif	Macrophage migration inhibitory factor OS=Mus musculus OX=10090 GN=Mif PE=1 SV=2	7.17	12675.4	3219.55	P34884	4	41.74	0	MIF_MOUSE	288.57	405.87	431.42	544.36	727.09	181.29	585.49	709.47	375.29	527.68	372.09	652.38	429.77	537.07		0.410232	0.78928	0.16245	0.889524
Hspd1	60 kDa heat shock protein_ mitochondrial OS=Mus musculus OX=10090 GN=Hspd1 PE=1 SV=1	5.82	61126.7	2573.12	P63038	22	51.66	0	CH60_MOUSE	717.35	584.19	386.9	542.94	492.81	502.6	682.82	724.47	639.74	664.98	461.11	591.66	537.8	627.46		0.232799	0.855091	0.139607	0.886215
Echs1	Enoyl-CoA hydratase_ mitochondrial OS=Mus musculus OX=10090 GN=Echs1 PE=1 SV=1	8.59	31873.6	923.35	Q8BH95	7	29.31	0	ECHM_MOUSE	155.99	128.87	122.91	124.1	113.65	100.94	120.07	166.55	123.51	156.97	134.91	150.71	124.41	142.12		0.194025	0.855819	0.139374	0.877538
Gatd3a	Glutamine amidotransferase-like class 1 domain-containing protein 3A_ mitochondrial OS=Mus musculus OX=10090 GN=Gatd3a PE=1 SV=1	9.04	28432.7	2963.63	Q9D172	9	50.38	0	GAL3A_MOUSE	331.81	305.82	295.88	255.88	279.92	299.44	328.18	433.73	315.5	319.1	318.4	293.2	294.79	334.69		0.17581	0.858791	0.138423	0.876602
Prdx5	Peroxiredoxin-5_ mitochondrial OS=Mus musculus OX=10090 GN=Prdx5 PE=1 SV=2	9.14	22239.7	5825.65	P99029	10	56.67	0	PRDX5_MOUSE	355.09	345.44	365.73	334.63	331.24	435.7	354.78	357.09	283.08	319.42	276.54	338.38	361.31	321.55		-0.169195	0.858791	0.138423	0.875299
Pgk1	Phosphoglycerate kinase 1 OS=Mus musculus OX=10090 GN=Pgk1 PE=1 SV=4	7.92	44949.8	1074.92	P09411	12	39.09	0	PGK1_MOUSE	307.33	333.86	301.16	291.78	243.24	272.65	316.16	408.32	274.75	377.99	273.19	370.15	291.67	336.76		0.196827	0.851201	0.140864	0.873661
Cnp	2'_3'-cyclic-nucleotide 3'-phosphodiesterase OS=Mus musculus OX=10090 GN=Cnp PE=1 SV=3	9.38	47522.6	29741.3	P16330	33	77.62	0	CN37_MOUSE	36974.3	33605	30867	27430.7	33650.6	28451.3	34434.6	37523.2	35442.5	33665.9	33697.5	37057.1	31829.8	35303.5		0.155769	0.858791	0.138423	0.872803
Ldha	L-lactate dehydrogenase A chain OS=Mus musculus OX=10090 GN=Ldha PE=1 SV=3	7.68	36840.8	510.14	P06151	3	9.34	0	LDHA_MOUSE	100.1	83.69	91.2	73.18	74.72	101.63	80.06	86.16	56.12	71.15	57.12	100.82	87.42	75.24		-0.236745	0.839924	0.144569	0.872651
Rab2a	Ras-related protein Rab-2A OS=Mus musculus OX=10090 GN=Rab2a PE=1 SV=1	6.11	23718.7	2436.06	P53994	11	63.68	0	RAB2A_MOUSE	135.23	125.63	140.06	95.13	104.75	120.92	149.4	175.35	116.88	121.36	124.53	141.9	120.29	138.24		0.199248	0.830893	0.147607	0.854449
Plcb1	1-phosphatidylinositol 4_5-bisphosphate phosphodiesterase beta-1 OS=Mus musculus OX=10090 GN=Plcb1 PE=1 SV=2	5.76	139252	1261.83	Q9Z1B3	42	43.75	0	PLCB1_MOUSE	1143.58	1106.73	1072.27	1119.92	836.83	827.65	847.08	1122.45	783.34	733.2	868.26	970.74	1017.83	887.51		-0.19891	0.830893	0.147607	0.85437
Map1b	Microtubule-associated protein 1B OS=Mus musculus OX=10090 GN=Map1b PE=1 SV=2	4.57	271510	279.78	P14873	23	13.68	0	MAP1B_MOUSE	1600.23	1326.9	1357.75	1246.95	1073.51	1262.51	1604.69	1775.45	1241.83	1232.33	1449.6	1706.75	1311.31	1501.77		0.191109	0.822962	0.150327	0.84486
Cpm	Carboxypeptidase M OS=Mus musculus OX=10090 GN=Cpm PE=1 SV=2	7.66	50955.1	505.59	Q80V42	14	38.83	0	CBPM_MOUSE	4139.23	3421.43	3057.88	2753.29	2861.27	2736.74	3298.95	3717.94	2852.1	307.63	2542.53	3512.11	3161.64	2705.21		-0.546726	0.642106	0.227979	0.843333
Sfxn5	Sideroflexin-5 OS=Mus musculus OX=10090 GN=Sfxn5 PE=1 SV=2	9.89	37499.7	235.89	Q925N0	3	8.48	0	SFXN5_MOUSE	2554.1	683.15	713.85	2241.47	1288.52	46.16	902.31	1341.1	411.16	1553.28	1350.23	2486.26	1254.54	1340.72		0.660942	0.515982	0.304802	0.8385
Gnai3	Guanine nucleotide-binding protein G(k) subunit alpha OS=Mus musculus OX=10090 GN=Gnai3 PE=1 SV=3	5.37	41108.5	3201.08	Q9DC51	9	29.1	0	GNAI3_MOUSE	119.95	97.04	126.79	81.69	89.87	102.84	104.8	98.18	81.48	84.59	80.97	89.52	103.03	89.93		-0.186019	0.815356	0.152983	0.836306
Rab21	Ras-related protein Rab-21 OS=Mus musculus OX=10090 GN=Rab21 PE=1 SV=4	7.92	24505.5	409.42	P35282	3	18.02	0	RAB21_MOUSE	71.77	39.06	45.4	29.49	30.8	34.52	35.56	35.3	25.31	31.3	29.31	42.14	41.84	33.15		-0.283329	0.779224	0.166255	0.829136
Csrp1	Cysteine and glycine-rich protein 1 OS=Mus musculus OX=10090 GN=Csrp1 PE=1 SV=3	8.56	21438.8	7907.96	P97315	9	60.62	0	CSRP1_MOUSE	500.44	394.92	368.06	469.39	424.51	567.17	546.56	537.27	428.78	654.4	467.72	479.33	454.08	519.01		0.194673	0.80295	0.157416	0.826212
Lamp1	Lysosome-associated membrane glycoprotein 1 OS=Mus musculus OX=10090 GN=Lamp1 PE=1 SV=2	8.44	44321.4	315.87	P11438	2	5.67	0	LAMP1_MOUSE	136.82	113.9	144.19	68.61	111	103.05	140.74	174.99	102.54	120.8	129.96	123.76	112.93	132.13		0.246052	0.776723	0.167216	0.814764
Kcnj10	ATP-sensitive inward rectifier potassium channel 10 OS=Mus musculus OX=10090 GN=Kcnj10 PE=1 SV=1	8.37	42717.2	449.01	Q9JM63	2	6.33	0	KCJ10_MOUSE	118.62	105.17	133.6	171.8	140.71	102.15	128.48	130.62	86.91	105.36	95.39	117.78	128.68	110.76		-0.208882	0.776723	0.167216	0.80432
Gltp	Glycolipid transfer protein OS=Mus musculus OX=10090 GN=Gltp PE=1 SV=3	7.24	23860.8	2609.41	Q9JL62	8	38.28	0	GLTP_MOUSE	163.44	143.41	122.75	119.38	140.98	151.16	191.84	225.25	142.83	154.9	121.2	149.14	140.19	164.19		0.206561	0.776723	0.167216	0.80372
Prdx3	Thioredoxin-dependent peroxide reductase_ mitochondrial OS=Mus musculus OX=10090 GN=Prdx3 PE=1 SV=1	7.39	28355.2	1024.22	P20108	6	32.3	0	PRDX3_MOUSE	143.16	118.91	115.98	108.29	113.45	102.94	153.47	179.98	115.35	132.79	106.96	122.51	117.12	135.17		0.191799	0.778371	0.166582	0.801653
Pura	Transcriptional activator protein Pur-alpha OS=Mus musculus OX=10090 GN=Pura PE=1 SV=1	6.05	34997.8	374.76	P42669	3	18.38	0	PURA_MOUSE	67.44	63.46	85.27	69.52	56.47	57.68	94.49	100.84	65.06	74.57	64.85	64.65	66.64	77.41		0.204968	0.7736	0.168422	0.800293
Acot13	Acyl-coenzyme A thioesterase 13 OS=Mus musculus OX=10090 GN=Acot13 PE=1 SV=1	9.36	15297	1549.74	Q9CQR4	3	20	0	ACO13_MOUSE	109.27	110.04	105.41	130.77	77.69	24.85	115.23	101.13	95.63	102.8	107.98	133.58	93	109.39		0.394747	0.694521	0.202059	0.798865
Atp4a	Potassium-transporting ATPase alpha chain 1 OS=Mus musculus OX=10090 GN=Atp4a PE=1 SV=3	5.53	115727	1143.82	Q64436	8	7.55	0	ATP4A_MOUSE	937.56	900.15	906.98	1006.91	827.48	811.18	871.07	767.73	815.97	739.8	593.25	1027.91	898.38	802.62		-0.178573	0.778371	0.166582	0.798592
Rap1b	Ras-related protein Rap-1b OS=Mus musculus OX=10090 GN=Rap1b PE=1 SV=2	5.46	21052.9	8065.8	Q99JI6	10	72.83	0	RAP1B_MOUSE	219.38	219.33	201.76	183.66	144.57	150.02	149.57	189.04	153.58	155.4	157.23	172.01	186.45	162.81		-0.180546	0.776723	0.167216	0.797431
Nipsnap1	Protein NipSnap homolog 1 OS=Mus musculus OX=10090 GN=Nipsnap1 PE=1 SV=1	9.84	33591.4	1373	O55125	6	28.87	0	NIPS1_MOUSE	193.6	203.59	186.45	166.13	157.81	177.64	213.74	242.06	181.57	187.38	175.38	208.27	180.87	201.4		0.15161	0.763695	0.172308	0.778598
Mobp	Myelin-associated oligodendrocyte basic protein OS=Mus musculus OX=10090 GN=Mobp PE=1 SV=1	11.73	19596.5	15543.2	Q9D2P8	6	34.12	0	MOBP_MOUSE	6685.59	6687.22	7203.12	6877.56	6392.39	6318.46	7139.74	8618.04	7354.93	6740.6	6413.11	8080.45	6694.06	7391.15		0.136895	0.763695	0.172308	0.775867
Ube2n	Ubiquitin-conjugating enzyme E2 N OS=Mus musculus OX=10090 GN=Ube2n PE=1 SV=1	6.18	17194.9	732.39	P61089	2	19.74	0	UBE2N_MOUSE	27.96	28.6	33.87	34.43	20.44	26.63	22.38	31.06	19.1	24.99	NA	NA	28.65	24.38		-0.234869	0.738463	0.182615	0.774913
Aldh3b1	Aldehyde dehydrogenase family 3 member B1 OS=Mus musculus OX=10090 GN=Aldh3b1 PE=1 SV=1	7.4	52976.6	525.61	Q80VQ0	14	38.25	0	AL3B1_MOUSE	189.48	177.16	254.88	161.86	140.14	150.16	176.82	202.24	122.72	127.81	126.26	163.31	178.95	153.19		-0.222217	0.738463	0.182615	0.771173
Crip2	Cysteine-rich protein 2 OS=Mus musculus OX=10090 GN=Crip2 PE=1 SV=1	8.63	23525.4	461.34	Q9DCT8	3	26.44	0	CRIP2_MOUSE	73.46	62.03	58.48	60.41	46.74	54.21	56.53	80.29	63.7	56.6	72.23	71.35	59.22	66.79		0.174662	0.748613	0.178397	0.768719
Gnb1	Guanine nucleotide-binding protein G(I)/G(S)/G(T) subunit beta-1 OS=Mus musculus OX=10090 GN=Gnb1 PE=1 SV=3	5.56	38175.4	12572.7	P62874	12	61.18	0	GBB1_MOUSE	1883.03	2267.84	1785.42	1821.88	1623.89	1708.59	1832.93	2350.38	1267.9	1826.47	1057.79	1418.31	1848.44	1625.63		-0.227426	0.732454	0.185159	0.76695
Gstm1	Glutathione S-transferase Mu 1 OS=Mus musculus OX=10090 GN=Gstm1 PE=1 SV=2	8.13	26084.1	7887.83	P10649	18	78.44	0	GSTM1_MOUSE	932.3	914.54	532	703.23	675.83	464	639.5	883.44	807.6	937.19	698.13	869.92	703.65	805.96		0.229398	0.730057	0.186184	0.765249
Gstm5	Glutathione S-transferase Mu 5 OS=Mus musculus OX=10090 GN=Gstm5 PE=1 SV=1	7.01	27034.2	445.72	P48774	7	32.59	0	GSTM5_MOUSE	37.49	33.91	44.02	26.56	33.88	31.56	47.05	42.64	31.04	32.63	42.77	39.73	34.57	39.31		0.186566	0.736201	0.183569	0.759473
Aspa	Aspartoacylase OS=Mus musculus OX=10090 GN=Aspa PE=1 SV=2	6.15	35800.9	630.57	Q8R3P0	8	35.58	0	ACY2_MOUSE	106.87	85.65	106.91	74.56	73.35	78.94	93.29	127.08	96.96	98.43	76.67	105.52	87.71	99.66		0.185911	0.732454	0.185159	0.75568
Glud1	Glutamate dehydrogenase 1_ mitochondrial OS=Mus musculus OX=10090 GN=Glud1 PE=1 SV=1	7.99	61679.1	808.97	P26443	10	26.88	0	DHE3_MOUSE	268.22	249.18	242.26	191.86	188.7	210.49	284.69	316.1	213.64	237.13	216.01	257.98	225.12	254.26		0.173655	0.732454	0.185159	0.752758
Anxa2	Annexin A2 OS=Mus musculus OX=10090 GN=Anxa2 PE=1 SV=2	7.7	38961.4	1640.28	P07356	12	47.79	0	ANXA2_MOUSE	271.87	227.79	369.3	371.18	136.43	197.57	223.13	259.66	177.99	198.25	167.12	215.32	262.36	206.91		-0.272844	0.694521	0.202059	0.746193
Ca14	Carbonic anhydrase 14 OS=Mus musculus OX=10090 GN=Ca14 PE=1 SV=1	5.93	37733.6	573.25	Q9WVT6	6	21.36	0	CAH14_MOUSE	262.15	256.82	243.68	238.4	194.91	234.4	183.96	234.88	189.31	207.4	224.72	254.18	238.39	215.74		-0.14714	0.722332	0.189526	0.737166
Ank3	Ankyrin-3 OS=Mus musculus OX=10090 GN=Ank3 PE=1 SV=1	6.26	215545	135.93	G5E8K5	4	2.6	0	ANK3_MOUSE	409.03	406.2	432.1	361.55	438.44	381.93	547.95	461.98	359.6	409.62	466.09	454.4	404.88	449.94		0.14358	0.71711	0.191818	0.731342
Atp5mf	ATP synthase subunit f_ mitochondrial OS=Mus musculus OX=10090 GN=Atp5mf PE=1 SV=3	10.39	10401.3	1960.84	P56135	2	26.14	0	ATPK_MOUSE	174.57	136.43	120.24	89.72	146.37	147.18	186.51	177.73	156.16	161.72	112.51	137.55	135.75	155.36		0.204481	0.694521	0.202059	0.723997
Slc16a1	Monocarboxylate transporter 1 OS=Mus musculus OX=10090 GN=Slc16a1 PE=1 SV=1	7.37	53894.6	282.33	P53986	3	7.71	0	MOT1_MOUSE	225.34	187.85	215.18	166.19	176.04	196.45	218.56	273.83	212.08	188.5	221.57	185.62	194.51	216.69		0.151745	0.704358	0.197534	0.720518
Gng7	Guanine nucleotide-binding protein G(I)/G(S)/G(O) subunit gamma-7 OS=Mus musculus OX=10090 GN=Gng7 PE=1 SV=2	8.87	7593.75	5472.19	Q61016	4	57.35	0	GBG7_MOUSE	55.94	51.31	45.99	42.83	27.36	35.25	41.1	38.22	26.9	37.84	32.57	43.17	43.11	36.63		-0.213033	0.68558	0.206262	0.717916
Ddah2	N(G)_N(G)-dimethylarginine dimethylaminohydrolase 2 OS=Mus musculus OX=10090 GN=Ddah2 PE=1 SV=1	5.62	29988	374.83	Q99LD8	2	9.12	0	DDAH2_MOUSE	34.34	37.87	43.14	49.32	39.66	31.19	42.14	57.77	40.25	45.26	36.99	41.99	39.26	44.07		0.168167	0.694521	0.202059	0.714591
Cadm4	Cell adhesion molecule 4 OS=Mus musculus OX=10090 GN=Cadm4 PE=1 SV=1	5.9	43179.6	3463.6	Q8R464	11	37.11	0	CADM4_MOUSE	783.49	610.03	567.08	616.16	606.67	533.86	730.18	804.82	569.45	644.85	635.23	730.02	619.55	685.76		0.14794	0.694521	0.202059	0.710103
Calr	Calreticulin OS=Mus musculus OX=10090 GN=Calr PE=1 SV=1	4.14	48165.7	392.64	P14211	5	19.71	0	CALR_MOUSE	144.66	118.61	119.61	136.11	105.28	106.52	169.73	200.35	132.44	154.26	90.88	117.4	121.8	144.18		0.207096	0.677897	0.209944	0.708825
Got1	Aspartate aminotransferase_ cytoplasmic OS=Mus musculus OX=10090 GN=Got1 PE=1 SV=3	6.79	46532.8	843.92	P05201	13	40.44	0	AATC_MOUSE	946.68	588.06	778.65	475.22	109.86	651.4	651.45	711.84	676.02	556.22	542.07	808.38	591.64	657.66		0.395637	0.587363	0.258605	0.708183
Hspe1	10 kDa heat shock protein_ mitochondrial OS=Mus musculus OX=10090 GN=Hspe1 PE=1 SV=2	9.13	10962.7	1632.49	Q64433	5	51.96	0	CH10_MOUSE	15.32	19.6	18.18	14.88	31.05	22.4	27.61	46.23	19.68	25.07	14.15	20.75	20.24	25.58		0.28509	0.645784	0.226056	0.705913
Dync1h1	Cytoplasmic dynein 1 heavy chain 1 OS=Mus musculus OX=10090 GN=Dync1h1 PE=1 SV=2	6.01	534784	259.24	Q9JHU4	45	12.04	0	DYHC1_MOUSE	162459	222114	131150	212709	320614	291883	159031	32445.2	260131	215691	276441	207254	223488	191832		-0.417623	0.568765	0.26992	0.705622
Sept4	Septin-4 OS=Mus musculus OX=10090 GN=Sept4 PE=1 SV=1	5.5	55392.2	2831.05	P28661	13	36.82	0	SEPT4_MOUSE	1420.79	1075.35	1276.69	796.25	915.81	1051.29	1035.88	1118.77	859.83	988.06	893.68	824.05	1089.36	953.38		-0.174047	0.681404	0.208255	0.703281
Marcks	Myristoylated alanine-rich C-kinase substrate OS=Mus musculus OX=10090 GN=Marcks PE=1 SV=2	4.13	29718.4	355.32	P26645	2	11	0	MARCS_MOUSE	88.6	71.73	88.61	62.34	53.69	111.89	58.86	56.79	79.51	61.97	81.42	67.58	79.48	67.69		-0.203094	0.66874	0.214417	0.698899
Cox6a1	Cytochrome c oxidase subunit 6A1_ mitochondrial OS=Mus musculus OX=10090 GN=Cox6a1 PE=1 SV=2	10.42	12352.2	1033.79	P43024	2	40.54	0	CX6A1_MOUSE	88.67	82.85	128.59	113.02	139.22	106.16	174.57	274.95	107.16	69.84	90.55	172.1	109.75	148.2		0.304474	0.628653	0.235151	0.698505
Rab8b	Ras-related protein Rab-8B OS=Mus musculus OX=10090 GN=Rab8b PE=1 SV=1	9.55	23774.2	2597.04	P61028	3	16.43	0	RAB8B_MOUSE	41.19	57.16	78.14	48.88	41.04	46.34	48.22	51.15	45.06	47.37	42.32	34.92	52.12	44.84		-0.189386	0.67119	0.213211	0.697397
Msn	Moesin OS=Mus musculus OX=10090 GN=Msn PE=1 SV=3	6.21	67881.2	1145.7	P26041	20	37.95	0	MOES_MOUSE	170.54	170.83	160.56	134.47	116.69	143.49	161.38	205.12	132.95	147.23	163.73	194.56	149.43	167.5		0.161787	0.67119	0.213211	0.690414
Idh3g	Isocitrate dehydrogenase [NAD] subunit gamma 1_ mitochondrial OS=Mus musculus OX=10090 GN=Idh3g PE=1 SV=1	9.33	43184.7	1224	P70404	9	39.69	0	IDHG1_MOUSE	370.6	320.2	314.52	279.74	300.9	350.07	458.85	450.81	255.84	348.49	318.14	381.59	322.67	368.95		0.170931	0.66874	0.214417	0.69024
Eef1a2	Elongation factor 1-alpha 2 OS=Mus musculus OX=10090 GN=Eef1a2 PE=1 SV=1	9.49	50796.4	4081.5	P62631	18	62.63	0	EF1A2_MOUSE	1004.81	1228.53	1337.46	1280.95	719.87	1064.22	1913.66	1493.55	759.86	1421.47	937.11	1554.08	1105.97	1346.62		0.245408	0.63784	0.230229	0.683422
Tppp	Tubulin polymerization-promoting protein OS=Mus musculus OX=10090 GN=Tppp PE=1 SV=1	10.1	23745.7	11044.5	Q7TQD2	8	44.04	0	TPPP_MOUSE	869.89	1437.11	1878.93	1578.14	792.95	1444.98	1052.25	1334.5	932.76	848.01	941.95	1495.18	1333.67	1100.77		-0.240169	0.632938	0.232842	0.676973
Psat1	Phosphoserine aminotransferase OS=Mus musculus OX=10090 GN=Psat1 PE=1 SV=1	8.09	40757.8	892.67	Q99K85	14	44.86	0	SERC_MOUSE	1175.92	1089.7	1586.52	1026.81	946.85	348.52	1180.74	1242.69	342.66	1812.37	1926.18	1978.68	1029.05	1413.89		0.388981	0.551959	0.28057	0.675252
Gnai1	Guanine nucleotide-binding protein G(i) subunit alpha-1 OS=Mus musculus OX=10090 GN=Gnai1 PE=1 SV=1	5.61	40931.4	6482.74	B2RSH2	12	40.96	0	GNAI1_MOUSE	1017.8	927.35	932.08	925.42	730.98	870.82	768.3	1158.49	647.76	755.08	738.28	834.43	900.74	817.06		-0.158396	0.65205	0.222818	0.671013
Lgi3	Leucine-rich repeat LGI family member 3 OS=Mus musculus OX=10090 GN=Lgi3 PE=1 SV=1	8.1	62559.1	2713.74	Q8K406	19	40.88	0	LGI3_MOUSE	727.61	610.92	605.65	454.68	538.46	584.61	628.23	863.09	585.96	622.24	558.76	663.85	586.99	653.69		0.154727	0.65205	0.222818	0.670156
Cdc42	Cell division control protein 42 homolog OS=Mus musculus OX=10090 GN=Cdc42 PE=1 SV=2	6.18	21600.8	4822.73	P60766	9	48.17	0	CDC42_MOUSE	322.14	390.11	342.8	248.27	306.62	351.33	422.29	437.23	292.17	434.07	258.83	399.53	326.88	374.02		0.178591	0.645784	0.226056	0.670024
Mpc1	Mitochondrial pyruvate carrier 1 OS=Mus musculus OX=10090 GN=Mpc1 PE=1 SV=1	10.01	12625.7	443.46	P63030	2	14.68	0	MPC1_MOUSE	77.33	76.84	65.1	44.88	55.63	55.25	93.18	70.56	79.7	48.84	55.98	86.41	62.51	72.45		0.202362	0.637628	0.230342	0.668969
Gjc3	Gap junction gamma-3 protein OS=Mus musculus OX=10090 GN=Gjc3 PE=1 SV=2	8.37	30805.9	1212.96	Q921C1	9	28.25	0	CXG3_MOUSE	236.6	226.89	233.68	378.8	162.21	156.96	255.89	218.34	293.87	320.02	220.59	251.34	232.52	260.01		0.211296	0.632938	0.232842	0.667276
Gnaq	Guanine nucleotide-binding protein G(q) subunit alpha OS=Mus musculus OX=10090 GN=Gnaq PE=1 SV=4	5.35	42443.3	2580.43	P21279	16	51.81	0	GNAQ_MOUSE	477.36	521.64	526.59	516.03	365.61	472.95	443.37	524.98	375.27	421.63	397.7	451.05	480.03	435.67		-0.137435	0.651048	0.223332	0.665396
Prnp	Major prion protein OS=Mus musculus OX=10090 GN=Prnp PE=1 SV=2	9.63	28148.6	2123.23	P04925	4	16.54	0	PRIO_MOUSE	323.16	254.59	297.8	116.98	235.81	237.18	229.45	335.49	235.1	281.1	278.43	285.8	244.25	274.23		0.222748	0.625532	0.236847	0.664008
Ppp3ca	Serine/threonine-protein phosphatase 2B catalytic subunit alpha isoform OS=Mus musculus OX=10090 GN=Ppp3ca PE=1 SV=1	5.5	59328.2	524.65	P63328	2	5.57	0	PP2BA_MOUSE	85.54	81.25	74.9	82.29	71.7	71.88	83.7	90.23	84.34	NA	68.6	104.57	77.93	86.29		0.137229	0.645784	0.226056	0.660204
Hspa5	Endoplasmic reticulum chaperone BiP OS=Mus musculus OX=10090 GN=Hspa5 PE=1 SV=3	4.88	72536.2	831.45	P20029	10	17.71	0	BIP_MOUSE	129.27	159.87	142.41	133.1	114.44	122.99	130.23	164.8	121.63	149.03	156.03	155.56	133.68	146.21		0.129366	0.643754	0.227115	0.656623
Fscn1	Fascin OS=Mus musculus OX=10090 GN=Fscn1 PE=1 SV=4	6.48	55249.4	1868.78	Q61553	20	56.19	0	FSCN1_MOUSE	540.4	536.8	545.5	652.78	350.7	363.83	358.25	466.58	392.25	507.19	361.78	512.31	498.34	433.06		-0.182762	0.628653	0.235151	0.654681
Rab6a	Ras-related protein Rab-6A OS=Mus musculus OX=10090 GN=Rab6a PE=1 SV=4	5.23	23703.9	1605.52	P35279	6	31.25	0	RAB6A_MOUSE	42.81	35.61	33.82	31.62	39.7	38.2	43.65	52.94	42.77	40.29	32.39	34.78	36.96	41.14		0.143252	0.632938	0.232842	0.648947
Slk	STE20-like serine/threonine-protein kinase OS=Mus musculus OX=10090 GN=Slk PE=1 SV=2	4.9	142141	226.69	O54988	8	7.62	0	SLK_MOUSE	367.91	265.37	360.43	234.64	229.71	329.57	320.23	338.69	182.14	252.28	226.95	256.84	297.94	262.86		-0.184255	0.61873	0.240586	0.645582
Got2	Aspartate aminotransferase_ mitochondrial OS=Mus musculus OX=10090 GN=Got2 PE=1 SV=1	9.36	47810.7	15629.2	P05202	24	66.28	0	AATM_MOUSE	12875.2	11272.4	10704.8	9027.47	8725.04	9880.08	9618.59	12746.9	10478.2	10347.8	11947.5	13403.1	10414.2	11423.7		0.136025	0.627446	0.235806	0.642021
Slc6a5	Sodium- and chloride-dependent glycine transporter 2 OS=Mus musculus OX=10090 GN=Slc6a5 PE=1 SV=1	6.96	89116.1	192.01	Q761V0	2	3.38	0	SC6A5_MOUSE	302.31	204.34	212.82	144.97	139.19	135.3	236.36	228.54	150.79	227.15	193.66	234.43	189.82	211.82		0.204449	0.607954	0.24663	0.641411
Rab14	Ras-related protein Rab-14 OS=Mus musculus OX=10090 GN=Rab14 PE=1 SV=3	5.82	24125.1	2526.32	Q91V41	12	69.77	0	RAB14_MOUSE	135.13	125.47	122.7	115.41	103.72	125.19	139.1	164.08	115.52	110.07	123.63	146.54	121.27	133.16		0.125667	0.6177	0.241157	0.630354
Rasa3	Ras GTPase-activating protein 3 OS=Mus musculus OX=10090 GN=Rasa3 PE=1 SV=2	7.03	97242	208.78	Q60790	2	2.52	0	RASA3_MOUSE	182.86	117.59	167.03	114.69	125.77	116.08	NA	141.11	104.55	NA	107.83	127.88	137.34	120.34		-0.175236	0.604127	0.248813	0.629028
Uqcr10	Cytochrome b-c1 complex subunit 9 OS=Mus musculus OX=10090 GN=Uqcr10 PE=1 SV=1	9.69	7445.54	1004.89	Q8R1I1	2	37.5	0	QCR9_MOUSE	19.34	27.24	22.6	14.71	22.91	23.23	37.78	18.24	20.93	29.14	21.93	21.97	21.67	25		0.186557	0.590388	0.25681	0.619162
Mapt	Microtubule-associated protein tau OS=Mus musculus OX=10090 GN=Mapt PE=1 SV=3	6.36	76585.7	785.69	P10637	12	25.78	0	TAU_MOUSE	416.26	584.17	598.51	484.83	228.85	479.02	395.05	390.58	275.19	368.13	420.91	491.09	465.27	390.16		-0.209903	0.582426	0.261562	0.619095
Gng12	Guanine nucleotide-binding protein G(I)/G(S)/G(O) subunit gamma-12 OS=Mus musculus OX=10090 GN=Gng12 PE=1 SV=3	9.48	8111.3	20151.5	Q9DAS9	5	69.44	0	GBG12_MOUSE	507.25	236.06	307.61	292.39	394.63	411.91	205.52	354.26	400.25	215.67	360.11	326.38	358.31	310.36		-0.207479	0.582426	0.261562	0.618278
Gnb4	Guanine nucleotide-binding protein subunit beta-4 OS=Mus musculus OX=10090 GN=Gnb4 PE=1 SV=4	5.73	38120.4	4291.38	P29387	12	56.18	0	GBB4_MOUSE	207.76	208.35	167.59	197.11	155.56	179.37	229.66	289.3	141.63	217.19	174.63	216.73	185.96	211.52		0.159179	0.59574	0.253665	0.616639
Oxct1	Succinyl-CoA:3-ketoacid coenzyme A transferase 1_ mitochondrial OS=Mus musculus OX=10090 GN=Oxct1 PE=1 SV=1	8.72	56387.9	1657.48	Q9D0K2	14	38.27	0	SCOT1_MOUSE	470.74	424.95	423.13	368.46	380.51	413.09	398.19	467.01	425.74	435.44	450.5	480.21	413.48	442.85		0.100888	0.607954	0.24663	0.616268
Cd47	Leukocyte surface antigen CD47 OS=Mus musculus OX=10090 GN=Cd47 PE=1 SV=2	8.71	33610.8	1920.48	Q61735	4	14.19	0	CD47_MOUSE	588.76	525.93	586.16	492.32	405.3	483.39	578.89	622.24	397.21	439.16	311.88	454.89	513.64	467.38		-0.162284	0.586975	0.258836	0.608995
Sept2	Septin-2 OS=Mus musculus OX=10090 GN=Sept2 PE=1 SV=2	6.12	41753.7	2850.44	P42208	15	59.56	0	SEPT2_MOUSE	571.88	549.94	549.28	458.8	455.17	410.8	480.99	579.56	349.04	469.25	363.65	495.15	499.31	456.28		-0.141684	0.589013	0.257625	0.605814
Mbp	Myelin basic protein OS=Mus musculus OX=10090 GN=Mbp PE=1 SV=2	10.27	27167.7	10938.7	P04370	10	31.6	0	MBP_MOUSE	74739.9	45088.9	53356.2	30648.3	72295.1	64059.4	66724.6	74462.7	60066.1	60059.2	52496.7	59182	56698	62165.2		0.187605	0.573677	0.266884	0.603573
Ndufc2	NADH dehydrogenase [ubiquinone] 1 subunit C2 OS=Mus musculus OX=10090 GN=Ndufc2 PE=1 SV=1	9.57	14220.8	1483.61	Q9CQ54	2	16.67	0	NDUC2_MOUSE	22.29	102.26	53.7	50.76	80.79	43.79	39.01	51.28	80.48	67.23	72.02	88.34	58.93	66.39		0.27458	0.535412	0.291466	0.601714
Lynx1	Ly-6/neurotoxin-like protein 1 OS=Mus musculus OX=10090 GN=Lynx1 PE=1 SV=1	8.13	13405.5	2305.72	P0DP60	3	30.17	0	LYNX1_MOUSE	108.46	94.82	93.19	79.28	89.03	85.53	103.44	119.31	96.89	98.45	86.33	89.03	91.72	98.91		0.10752	0.573677	0.266884	0.583666
Ywhae	14-3-3 protein epsilon OS=Mus musculus OX=10090 GN=Ywhae PE=1 SV=1	4.44	29345	4769.36	P62259	14	55.69	0	1433E_MOUSE	460.53	401.86	348.43	296.18	380.48	459.86	445.78	506.9	308.47	383.44	463.52	480.25	391.22	431.39		0.138706	0.564217	0.272762	0.581016
Cct3	T-complex protein 1 subunit gamma OS=Mus musculus OX=10090 GN=Cct3 PE=1 SV=1	6.29	61200.4	298.92	P80318	6	16.15	0	TCPG_MOUSE	99.52	87.2	93.44	79.75	74.86	84.3	91.39	96.51	90.07	83.83	87.9	104.49	86.51	92.37		0.0973028	0.567347	0.270803	0.57563
Rab35	Ras-related protein Rab-35 OS=Mus musculus OX=10090 GN=Rab35 PE=1 SV=1	8.39	23310.4	2703.62	Q6PHN9	4	24.38	0	RAB35_MOUSE	70.06	59.62	79.69	68.38	45.98	62.01	77.28	89.74	54.22	74.72	55.11	76.31	64.29	71.23		0.144081	0.549778	0.281982	0.568344
Stx1b	Syntaxin-1B OS=Mus musculus OX=10090 GN=Stx1b PE=1 SV=1	5.09	33472.9	5634.52	P61264	15	59.03	0	STX1B_MOUSE	977.17	843.34	799.12	727.16	733.94	807.8	896.72	1124.16	675.51	765.18	844.78	1082.46	814.76	898.14		0.124493	0.549739	0.282008	0.563659
Gdi2	Rab GDP dissociation inhibitor beta OS=Mus musculus OX=10090 GN=Gdi2 PE=1 SV=1	5.87	51050.5	2097.56	Q61598	21	61.35	0	GDIB_MOUSE	342.32	268.7	286.2	237.09	231.32	293.59	275.89	380.91	248.2	277.3	297.21	323.91	276.54	300.57		0.119346	0.55001	0.281832	0.562809
Rida	2-iminobutanoate/2-iminopropanoate deaminase OS=Mus musculus OX=10090 GN=Rida PE=1 SV=3	9.13	14312.5	2956.8	P52760	6	59.26	0	RIDA_MOUSE	97.63	91.04	82.49	71.87	69.55	85.33	104.23	116.29	82.62	96.12	62.27	90.67	82.99	92.03		0.132884	0.541702	0.287275	0.557762
Reep5	Receptor expression-enhancing protein 5 OS=Mus musculus OX=10090 GN=Reep5 PE=1 SV=1	8.54	21278.8	1395.51	Q60870	2	10.27	0	REEP5_MOUSE	170.85	173.03	188.29	70.83	156.75	109.23	134.33	219.92	133.81	174.15	130.69	164.42	144.83	159.56		0.188639	0.515418	0.305198	0.548854
Rab5c	Ras-related protein Rab-5C OS=Mus musculus OX=10090 GN=Rab5c PE=1 SV=2	8.58	23640.7	2413.51	P35278	9	58.8	0	RAB5C_MOUSE	130.29	105.29	139.25	103.34	83.56	110.72	108.93	150.71	96.26	89.93	89.98	79.39	112.07	102.53		-0.141201	0.528296	0.296281	0.54684
Gpd1	Glycerol-3-phosphate dehydrogenase [NAD(+)]_ cytoplasmic OS=Mus musculus OX=10090 GN=Gpd1 PE=1 SV=3	6.83	38200.1	567.85	P13707	8	29.8	0	GPDA_MOUSE	90.71	98.59	80.24	75.13	90.01	87.67	77.2	110.99	78.62	80.23	64.32	77.11	87.06	81.41		-0.111067	0.528841	0.295909	0.540378
Ckap5	Cytoskeleton-associated protein 5 OS=Mus musculus OX=10090 GN=Ckap5 PE=1 SV=1	7.91	227289	175.49	A2AGT5	4	2.02	0	CKAP5_MOUSE	424.61	444.35	438.05	545.51	341.13	398.31	486.17	429.2	342.86	341.65	405.32	388.91	431.99	399.02		-0.1115	0.528296	0.296281	0.539934
Pfkp	ATP-dependent 6-phosphofructokinase_ platelet type OS=Mus musculus OX=10090 GN=Pfkp PE=1 SV=1	6.75	86481.7	185.75	Q9WUA3	3	6.12	0	PFKAP_MOUSE	56.97	99.62	129.16	104.14	86.75	83.6	118.14	143.67	79.11	73.37	105.55	103.97	93.37	103.97		0.160928	0.501801	0.314919	0.526974
Cst3	Cystatin-C OS=Mus musculus OX=10090 GN=Cst3 PE=1 SV=2	9.3	15759	2695.85	P21460	5	42.14	0	CYTC_MOUSE	76.53	82.81	77.74	66.72	54.19	65.21	84.82	81.84	58.01	75.28	77.8	77.14	70.53	75.82		0.107884	0.515418	0.305198	0.526588
Arf5	ADP-ribosylation factor 5 OS=Mus musculus OX=10090 GN=Arf5 PE=1 SV=2	6.39	20643.8	3898.49	P84084	9	59.44	0	ARF5_MOUSE	219.86	187.4	185.41	190.91	240.88	198.05	212.69	258.11	190.04	119.7	130.96	233.19	203.75	190.78		-0.144567	0.50031	0.316002	0.520778
Ca2	Carbonic anhydrase 2 OS=Mus musculus OX=10090 GN=Ca2 PE=1 SV=4	6.57	29146.6	6150.29	P00920	10	58.08	0	CAH2_MOUSE	1047.3	1221.17	1262.08	1238.38	836.08	955.26	988.34	1544.57	1139.81	1013.28	1159.93	1257.9	1093.38	1183.97		0.114715	0.507237	0.311002	0.520047
Chmp6	Charged multivesicular body protein 6 OS=Mus musculus OX=10090 GN=Chmp6 PE=1 SV=2	5.21	23472.7	225.77	P0C0A3	2	13.5	0	CHMP6_MOUSE	68.99	44.71	52.53	48.44	38.03	39.26	31.17	58.25	44.98	35.29	48.26	47.34	48.66	44.21		-0.138613	0.50031	0.316002	0.519157
Gnao1	Guanine nucleotide-binding protein G(o) subunit alpha OS=Mus musculus OX=10090 GN=Gnao1 PE=1 SV=3	5.2	40654.9	10730.1	P18872	17	57.34	0	GNAO_MOUSE	3772.05	2451.16	2932.65	1769.13	2225.34	2357.65	2879.48	3661.82	2389.22	2288.31	2616.8	2939.33	2584.66	2795.83		0.136175	0.50031	0.316002	0.518511
Serpinb1a	Leukocyte elastase inhibitor A OS=Mus musculus OX=10090 GN=Serpinb1a PE=1 SV=1	5.82	42746.1	362.66	Q9D154	5	18.47	0	ILEUA_MOUSE	98.26	79.92	92.02	75.67	81.76	74.94	98.08	135.82	71	95.73	67.64	92.34	83.76	93.44		0.125874	0.50031	0.316002	0.515902
Enpp6	Ectonucleotide pyrophosphatase/phosphodiesterase family member 6 OS=Mus musculus OX=10090 GN=Enpp6 PE=1 SV=1	6.98	50960.7	3276.32	Q8BGN3	14	43.18	0	ENPP6_MOUSE	618.15	695.55	861.6	663.92	647.14	749	765.74	808.45	570.16	614.66	531.03	670.33	705.89	660.06		-0.104391	0.504118	0.313243	0.514813
Eef2	Elongation factor 2 OS=Mus musculus OX=10090 GN=Eef2 PE=1 SV=2	6.43	96283.7	274.29	P58252	9	11.07	0	EF2_MOUSE	265.21	214.8	236.45	259.63	210.79	204.51	240.61	280.74	223.78	229.35	239.06	257.88	231.9	245.23		0.0839228	0.50031	0.316002	0.5073
Ntm	Neurotrimin OS=Mus musculus OX=10090 GN=Ntm PE=1 SV=2	7.74	38554.8	443.09	Q99PJ0	6	25.58	0	NTRI_MOUSE	85.49	86.6	96.69	80.23	76.07	64.42	82.64	99.55	68.07	82.57	88.94	103.49	81.58	87.54		0.0994471	0.491136	0.322749	0.501103
Atp1a1	Sodium/potassium-transporting ATPase subunit alpha-1 OS=Mus musculus OX=10090 GN=Atp1a1 PE=1 SV=1	5.14	114294	11529.6	Q8VDN2	47	49.27	0	AT1A1_MOUSE	6984.51	6561.7	6297.46	6363.14	5761.96	5293.68	6974.67	7469.35	6151.28	6797.27	5394.99	6791.71	6210.41	6596.55		0.0851295	0.493425	0.321052	0.500715
Cox6b1	Cytochrome c oxidase subunit 6B1 OS=Mus musculus OX=10090 GN=Cox6b1 PE=1 SV=2	8.95	10299.6	4691.67	P56391	4	52.33	0	CX6B1_MOUSE	71.76	113.91	98.31	117.44	110.86	99.86	123.32	206.64	110.1	77.13	86.83	104.03	102.02	118.01		0.150629	0.475392	0.334663	0.498685
Clic4	Chloride intracellular channel protein 4 OS=Mus musculus OX=10090 GN=Clic4 PE=1 SV=3	5.29	28957.2	1109.52	Q9QYB1	8	53.36	0	CLIC4_MOUSE	241.49	264.59	271.32	219.27	227.35	244.8	263.89	286.56	204.87	202.33	186.24	245.89	244.8	231.63		-0.0932626	0.485109	0.327259	0.493992
Rab18	Ras-related protein Rab-18 OS=Mus musculus OX=10090 GN=Rab18 PE=1 SV=2	5.06	23320.3	575.58	P35293	5	28.16	0	RAB18_MOUSE	47.98	48.15	49.84	37.72	44.2	43.99	47.5	55.6	30.37	43.36	41.2	38.36	45.31	42.73		-0.103259	0.482856	0.328961	0.493774
Ap2b1	AP-2 complex subunit beta OS=Mus musculus OX=10090 GN=Ap2b1 PE=1 SV=1	5.06	105495	253.22	Q9DBG3	10	12.17	0	AP2B1_MOUSE	277.04	275.95	272.8	244.97	219.17	222.11	281.35	272.74	207.75	254.98	276.78	322.7	252.01	269.38		0.0909639	0.485109	0.327259	0.493563
Cntnap2	Contactin-associated protein-like 2 OS=Mus musculus OX=10090 GN=Cntnap2 PE=1 SV=2	6.34	150193	258.67	Q9CPW0	11	10.36	0	CNTP2_MOUSE	665.31	584.03	651.01	508.49	462.51	544.49	590.02	508.31	513.8	584.46	512.77	492.32	569.31	533.61		-0.0851111	0.484109	0.328013	0.491534
Stx4	Syntaxin-4 OS=Mus musculus OX=10090 GN=Stx4 PE=1 SV=1	5.79	34279.1	341.3	P70452	4	15.77	0	STX4_MOUSE	81.89	78.07	81.62	70.61	57.28	65.43	70.79	82.74	61.56	66.38	58.92	67.18	72.48	67.93		-0.0905955	0.482856	0.328961	0.491282
Fhl1	Four and a half LIM domains protein 1 OS=Mus musculus OX=10090 GN=Fhl1 PE=1 SV=3	8.26	33827.7	447.53	P97447	3	15	0	FHL1_MOUSE	74.06	62.89	73.96	72.77	64.94	74.25	94.26	107.73	57.95	63.1	65.54	78.31	70.48	77.81		0.109484	0.477622	0.332949	0.490009
Stx1a	Syntaxin-1A OS=Mus musculus OX=10090 GN=Stx1a PE=1 SV=3	4.96	33225.7	543.36	O35526	6	22.92	0	STX1A_MOUSE	110.38	95.97	87.31	60.1	88.53	93.01	98.2	101.97	72.82	107.08	87.59	104.59	89.22	95.37		0.107355	0.476586	0.333744	0.488528
Gpx4	Phospholipid hydroperoxide glutathione peroxidase OS=Mus musculus OX=10090 GN=Gpx4 PE=1 SV=4	8.44	22649	1323.97	O70325	7	37.56	0	GPX4_MOUSE	129.9	125.58	123.57	123.7	109.61	121.98	148.75	131.83	121.57	139.76	122.23	111.43	122.39	129.26		0.0741395	0.482856	0.328961	0.488515
Dnm1	Dynamin-1 OS=Mus musculus OX=10090 GN=Dnm1 PE=1 SV=2	7.66	98202.2	3784.17	P39053	41	54.44	0	DYN1_MOUSE	9917.36	9275.97	14222.1	11835.8	1667.16	8031.75	12017.4	10330.9	8460.76	8890.01	6926.49	8451	9158.34	9179.41		0.233075	0.427959	0.373286	0.487312
Ralb	Ras-related protein Ral-B OS=Mus musculus OX=10090 GN=Ralb PE=1 SV=1	6.26	23463.6	1754.59	Q9JIW9	4	25.24	0	RALB_MOUSE	89.69	66.7	87.63	54.43	29.78	61.58	68.51	100.91	58.55	59.83	84.04	51.52	64.97	70.56		0.167132	0.457036	0.349111	0.486636
Cox6c	Cytochrome c oxidase subunit 6C OS=Mus musculus OX=10090 GN=Cox6c PE=1 SV=3	10.72	8469.03	4211.89	Q9CPQ1	5	46.05	0	COX6C_MOUSE	93.46	68.39	68.16	44.89	56.25	72.9	84.65	185.83	20.64	38.92	114.02	153.99	67.34	99.67		0.244688	0.418536	0.381474	0.484814
Prdx1	Peroxiredoxin-1 OS=Mus musculus OX=10090 GN=Prdx1 PE=1 SV=1	8.24	22404.6	7880.17	P35700	12	67.34	0	PRDX1_MOUSE	890.45	904.83	1166.85	1430.22	1165.27	997.69	715.75	1054.53	763.93	601.61	1394.65	1689.97	1092.55	1036.74		-0.155845	0.45472	0.350978	0.480685
Mog	Myelin-oligodendrocyte glycoprotein OS=Mus musculus OX=10090 GN=Mog PE=1 SV=1	7.92	28670.2	21455.7	Q61885	11	42.28	0	MOG_MOUSE	19511.4	19053	17314.4	13901.4	15677.3	17099.4	16663	20435.3	16669.2	18271.3	18055.7	17704.6	17092.8	17966.5		0.0778139	0.474079	0.335677	0.480422
Rhoa	Transforming protein RhoA OS=Mus musculus OX=10090 GN=Rhoa PE=1 SV=1	5.75	22124.4	5456.75	Q9QUI0	9	57.51	0	RHOA_MOUSE	489.79	384.4	413.29	487.82	362.22	210.15	334.66	382.81	399.89	348.05	401.06	229.17	391.28	349.27		-0.13635	0.457036	0.349111	0.476942
Rab7a	Ras-related protein Rab-7a OS=Mus musculus OX=10090 GN=Rab7a PE=1 SV=2	6.57	23774.9	2883.81	P51150	8	51.21	0	RAB7A_MOUSE	153.6	141.7	122.33	118.14	116.1	125.02	141.65	156.49	115.16	129.38	133.6	143.09	129.48	136.56		0.0779463	0.469109	0.33954	0.475541
Cmtm5	CKLF-like MARVEL transmembrane domain-containing protein 5 OS=Mus musculus OX=10090 GN=Cmtm5 PE=1 SV=1	4.55	17617.5	1196.91	Q9D6G9	4	30.13	0	CKLF5_MOUSE	152.86	155.93	139.98	123.47	141.93	119.02	131.66	151.38	110.79	128.45	121.91	145.24	138.86	131.57		-0.0784321	0.465459	0.342406	0.472021
Bsg	Basigin OS=Mus musculus OX=10090 GN=Bsg PE=1 SV=2	5.48	42901	761.33	P18572	4	11.83	0	BASI_MOUSE	288.49	188.82	195.91	193.45	198.6	233.72	208.02	240.96	184.37	209.26	132.88	238.27	216.5	202.29		-0.107699	0.458869	0.347641	0.471338
Uqcrfs1	Cytochrome b-c1 complex subunit Rieske_ mitochondrial OS=Mus musculus OX=10090 GN=Uqcrfs1 PE=1 SV=1	8.92	29652.8	2639.43	Q9CR68	9	29.2	0	UCRI_MOUSE	648.58	710.99	733.7	602.19	537.62	550.43	765.2	1018.24	521.14	576.1	585.85	686.35	630.58	692.15		0.10694	0.457036	0.349111	0.469381
Fah	Fumarylacetoacetase OS=Mus musculus OX=10090 GN=Fah PE=1 SV=2	6.79	46518.1	407.3	P35505	3	9.55	0	FAAA_MOUSE	87.45	97.28	85.65	76.1	51.33	82.49	82.3	131.1	62.74	66.9	91.39	95.32	80.05	88.29		0.124787	0.45139	0.35368	0.468321
Atp1b3	Sodium/potassium-transporting ATPase subunit beta-3 OS=Mus musculus OX=10090 GN=Atp1b3 PE=1 SV=1	8.65	32117.9	2222.35	P97370	9	41.73	0	AT1B3_MOUSE	884.72	833.09	790.61	596.56	705.41	669.62	641.93	774.03	638.68	711	725.47	722.31	746.67	702.24		-0.0789748	0.460912	0.34601	0.467629
Cryab	Alpha-crystallin B chain OS=Mus musculus OX=10090 GN=Cryab PE=1 SV=2	6.96	20068.8	3287.28	P23927	9	61.14	0	CRYAB_MOUSE	263.74	325.57	319.64	276.78	212.74	203.64	304.05	359.61	232.77	285.12	189.58	393.46	267.02	294.1		0.119643	0.447469	0.356887	0.463188
Cltc	Clathrin heavy chain 1 OS=Mus musculus OX=10090 GN=Cltc PE=1 SV=3	5.36	193325	692.89	Q68FD5	39	30.21	0	CLH1_MOUSE	1090.11	1088.31	1817.47	921.31	859.59	877.42	1383.78	1454.2	1028.46	1030.82	964.25	1173.41	1109.04	1172.49		0.114665	0.444773	0.35911	0.459316
Ehd3	EH domain-containing protein 3 OS=Mus musculus OX=10090 GN=Ehd3 PE=1 SV=2	6.03	60878.2	1692.14	Q9QXY6	19	44.67	0	EHD3_MOUSE	3386.97	5590.2	5988.15	6123.46	4635.2	5090.88	7125.86	7510.22	4374.54	5172.17	3756.95	5919.5	5135.81	5643.21		0.119493	0.44275	0.360787	0.458591
Adam23	Disintegrin and metalloproteinase domain-containing protein 23 OS=Mus musculus OX=10090 GN=Adam23 PE=1 SV=1	7.49	94171	1136.56	Q9R1V7	10	19.3	0	ADA23_MOUSE	971.33	860.72	863.2	716.9	702.19	767.76	857.17	1169.18	813.88	789.26	675.59	920.18	813.68	870.88		0.0868164	0.444773	0.35911	0.453167
Pfkm	ATP-dependent 6-phosphofructokinase_ muscle type OS=Mus musculus OX=10090 GN=Pfkm PE=1 SV=3	7.9	86124.2	425.24	P47857	11	17.56	0	PFKAM_MOUSE	289.53	314.19	305.81	227.13	284.84	310.61	319.43	364.8	256	270.45	283.45	337.74	288.68	305.31		0.0777264	0.445148	0.358799	0.451883
Rap2a	Ras-related protein Rap-2a OS=Mus musculus OX=10090 GN=Rap2a PE=1 SV=2	4.53	20870.6	4741.8	Q80ZJ1	8	48.09	0	RAP2A_MOUSE	122.96	125.22	137.92	147.31	106.83	82.77	100.22	136.95	104.59	108.14	108.91	113.47	120.5	112.05		-0.0879876	0.44275	0.360787	0.451408
Jam3	Junctional adhesion molecule C OS=Mus musculus OX=10090 GN=Jam3 PE=1 SV=2	6.67	35407.9	2537.08	Q9D8B7	12	43.23	0	JAM3_MOUSE	372.37	358.8	335.52	284.1	277.77	347.52	388.33	345.13	281.73	312.31	374.73	380.95	329.35	347.2		0.0755778	0.444773	0.35911	0.451149
Capn5	Calpain-5 OS=Mus musculus OX=10090 GN=Capn5 PE=1 SV=1	7.03	73924.2	347.09	O08688	3	7.97	0	CAN5_MOUSE	206.97	205.1	186.79	148.76	170.67	159.02	271.19	188.26	244.73	119.13	226.87	151.91	179.55	200.35		0.113378	0.435694	0.366696	0.450204
Eef1a1	Elongation factor 1-alpha 1 OS=Mus musculus OX=10090 GN=Eef1a1 PE=1 SV=3	9.49	50456.1	5494.06	P10126	18	55.19	0	EF1A1_MOUSE	1876.15	2534.18	2977.15	2791.86	1993.42	2266.23	3708.26	2966.33	1576.14	2792.78	1944.55	3074.61	2406.5	2677.11		0.116228	0.427959	0.373286	0.443461
Gna13	Guanine nucleotide-binding protein subunit alpha-13 OS=Mus musculus OX=10090 GN=Gna13 PE=1 SV=1	8.26	44396.9	2159.7	P27601	11	28.91	0	GNA13_MOUSE	145.29	96.91	125.18	104.48	86.71	98.11	101.88	122.68	88.42	98.27	103.47	99.34	109.45	102.34		-0.0814881	0.435694	0.366696	0.443249
Golga7	Golgin subfamily A member 7 OS=Mus musculus OX=10090 GN=Golga7 PE=1 SV=1	6.9	16020.1	876.8	Q91W53	4	30.66	0	GOGA7_MOUSE	54.19	40.24	44.31	46.83	33.39	41.69	48.41	52.42	31.66	35.34	40.07	38.64	43.44	41.09		-0.0864727	0.429073	0.372329	0.4377
Arhgdia	Rho GDP-dissociation inhibitor 1 OS=Mus musculus OX=10090 GN=Arhgdia PE=1 SV=3	4.92	23464.5	2920.36	Q99PT1	5	31.86	0	GDIR1_MOUSE	205.13	197.71	179.67	174.84	158.51	194.22	204.42	215.09	169.68	193.9	173.01	203.21	185.01	193.22		0.0624764	0.43285	0.369105	0.437336
Efnb3	Ephrin-B3 OS=Mus musculus OX=10090 GN=Efnb3 PE=1 SV=1	8.25	36226.9	489.95	O35393	4	16.18	0	EFNB3_MOUSE	84.32	67.93	54.88	82.16	51.35	59.74	71.05	73.07	53.73	47.08	60.56	68.55	66.73	62.34		-0.0898707	0.427857	0.373373	0.437194
Cd81	CD81 antigen OS=Mus musculus OX=10090 GN=Cd81 PE=1 SV=2	5.46	26498.9	10991.7	P35762	4	30.93	0	CD81_MOUSE	8450.66	8446.66	8274.84	8627.57	7917.96	7665.9	10191.2	8422.96	7874.53	7971.05	7922.7	9248.54	8230.6	8605.16		0.0586739	0.43285	0.369105	0.436809
Vat1	Synaptic vesicle membrane protein VAT-1 homolog OS=Mus musculus OX=10090 GN=Vat1 PE=1 SV=3	5.95	43324.8	1736.44	Q62465	12	39.16	0	VAT1_MOUSE	415.1	376.42	364.1	327.82	306.95	334.59	371.94	452.82	354.86	368.61	323.85	350.65	354.16	370.45		0.0642119	0.427857	0.373373	0.432649
Ehd1	EH domain-containing protein 1 OS=Mus musculus OX=10090 GN=Ehd1 PE=1 SV=1	6.39	60659.9	1077.7	Q9WVK4	19	51.69	0	EHD1_MOUSE	413.2	422.5	441.07	382.15	346.19	379.59	398.72	454.34	382.75	377	414.15	454.57	397.45	413.59		0.0579711	0.427959	0.373286	0.431867
Plp1	Myelin proteolipid protein OS=Mus musculus OX=10090 GN=Plp1 PE=1 SV=2	8.29	30875.6	16053.5	P60202	12	36.82	0	MYPR_MOUSE	106736	87330.5	108187	62441	116250	120106	105377	117359	105977	104794	104284	87735.3	100175	104255		0.0858847	0.421642	0.378755	0.4303
Cycs	Cytochrome c_ somatic OS=Mus musculus OX=10090 GN=Cycs PE=1 SV=2	10.21	11719.5	15395.4	P62897	6	55.24	0	CYC_MOUSE	634.93	610.58	627.47	492.1	363.99	584.54	452.9	829.29	551.89	385.54	457.22	456.26	552.27	522.18		-0.1019	0.416199	0.383531	0.428492
Hdac11	Histone deacetylase 11 OS=Mus musculus OX=10090 GN=Hdac11 PE=1 SV=1	6.74	39385.2	409.25	Q91WA3	3	10.09	0	HDA11_MOUSE	94.3	74.19	82.03	53.96	55.29	67.06	104.63	81.96	61.93	53.49	46.73	55.42	71.14	67.36		-0.107031	0.413454	0.385963	0.427083
Arpc4	Actin-related protein 2/3 complex subunit 4 OS=Mus musculus OX=10090 GN=Arpc4 PE=1 SV=3	8.78	19781.1	272.37	P59999	2	11.31	0	ARPC4_MOUSE	44.1	36.16	45.75	32.88	30.51	31.16	38.37	39.78	30.15	31.17	25.73	43.48	36.76	34.78		-0.0844985	0.418536	0.381474	0.42698
Nfasc	Neurofascin OS=Mus musculus OX=10090 GN=Nfasc PE=1 SV=1	5.79	138774	1623.59	Q810U3	30	29.03	0	NFASC_MOUSE	2932.53	3739.56	3210.16	2530.69	2505.48	3583.68	4114.62	3566.43	1646.85	2501.18	2471.23	3452.57	3083.68	2958.81		-0.105544	0.410658	0.388456	0.424004
Endod1	Endonuclease domain-containing 1 protein OS=Mus musculus OX=10090 GN=Endod1 PE=1 SV=2	5.76	55946.6	1467.82	Q8C522	12	36.13	0	ENDD1_MOUSE	563.89	620.68	449.55	463.35	522.17	554.15	485.89	656.19	433.2	494.15	455.77	511.62	528.96	506.14		-0.0677565	0.418536	0.381474	0.423985
Gnai2	Guanine nucleotide-binding protein G(i) subunit alpha-2 OS=Mus musculus OX=10090 GN=Gnai2 PE=1 SV=5	5.12	41059.3	7463.96	P08752	17	55.77	0	GNAI2_MOUSE	829.31	544.77	816.87	584.78	648.7	629.56	704.77	976.11	612.66	681.14	597.86	711.66	675.66	714.04		0.0784626	0.414942	0.384643	0.422295
Hebp1	Heme-binding protein 1 OS=Mus musculus OX=10090 GN=Hebp1 PE=1 SV=2	4.99	21181	411.5	Q9R257	2	23.68	0	HEBP1_MOUSE	48.21	47.87	45.81	50.89	42.46	42.38	64.5	51.87	43.12	46.03	41.82	45.28	46.27	48.77		0.0628685	0.413422	0.385991	0.418175
Rras2	Ras-related protein R-Ras2 OS=Mus musculus OX=10090 GN=Rras2 PE=1 SV=1	5.65	23627.7	2205	P62071	5	29.41	0	RRAS2_MOUSE	95.14	103.09	56.78	97.61	102.97	97.69	97.64	69.95	65.94	95.25	109.32	81.47	92.21	86.6		-0.0862059	0.403626	0.394797	0.41273
Rhob	Rho-related GTP-binding protein RhoB OS=Mus musculus OX=10090 GN=Rhob PE=1 SV=1	4.92	22579.6	3794.73	P62746	8	63.78	0	RHOB_MOUSE	580.26	606.4	515.33	359.57	449.81	445.45	528.11	542.78	424.88	430.57	447.1	417.75	492.8	465.2		-0.0692618	0.403626	0.394797	0.409526
Gng2	Guanine nucleotide-binding protein G(I)/G(S)/G(O) subunit gamma-2 OS=Mus musculus OX=10090 GN=Gng2 PE=1 SV=2	8.23	7964.22	1389.95	P63213	3	52.11	0	GBG2_MOUSE	35.19	29.5	34.68	23.89	22.85	23.47	22.24	35.78	27.81	27.69	28	37.26	28.27	29.8		0.0784884	0.401437	0.396792	0.409038
Phgdh	D-3-phosphoglycerate dehydrogenase OS=Mus musculus OX=10090 GN=Phgdh PE=1 SV=3	6.13	57384	648.47	Q61753	12	26.83	0	SERA_MOUSE	362.32	366.97	312.53	297.34	313.39	335.13	364.15	394.91	314.17	327.34	349.67	309.6	331.28	343.31		0.0505128	0.401437	0.396792	0.404603
Mpp2	MAGUK p55 subfamily member 2 OS=Mus musculus OX=10090 GN=Mpp2 PE=1 SV=1	6.03	61840.3	380.07	Q9WV34	2	5.43	0	MPP2_MOUSE	109.67	107.58	105.62	85.83	NA	80.43	NA	100.57	81.46	91.31	NA	97.76	97.83	92.78		-0.0694331	0.398298	0.39967	0.404305
Lancl1	LanC-like protein 1 OS=Mus musculus OX=10090 GN=Lancl1 PE=1 SV=1	7.64	46082.6	672.25	O89112	5	16.79	0	LANC1_MOUSE	224.46	192.46	219.79	194.93	128.74	189.84	185.53	201.71	157.41	160.07	178.86	204.09	191.7	181.28		-0.0656903	0.393076	0.404505	0.398527
Dynll1	Dynein light chain 1_ cytoplasmic OS=Mus musculus OX=10090 GN=Dynll1 PE=1 SV=1	7.24	10537	9014.94	P63168	4	57.3	0	DYL1_MOUSE	195.47	45.32	169.47	195.65	131.82	147.5	143.29	188.46	134.33	142.86	134.49	137.04	147.54	146.74		0.123653	0.376489	0.420253	0.396275
Rhog	Rho-related GTP-binding protein RhoG OS=Mus musculus OX=10090 GN=Rhog PE=1 SV=1	8.08	21764.7	14142.5	P84096	12	71.73	0	RHOG_MOUSE	579.99	601.72	743.44	485.87	516.78	573.65	669.96	488.45	407.1	529.95	529.85	745.14	583.58	561.74		-0.0705012	0.389442	0.407904	0.395772
Gpm6a	Neuronal membrane glycoprotein M6-a OS=Mus musculus OX=10090 GN=Gpm6a PE=1 SV=1	5.01	31890.9	1100.38	P35802	6	17.99	0	GPM6A_MOUSE	415.71	318.64	602.46	242.91	219.32	371.2	412.03	235.9	257.38	524.67	503.62	382.62	361.71	386.04		0.113409	0.37906	0.417773	0.395662
Dync1li2	Cytoplasmic dynein 1 light intermediate chain 2 OS=Mus musculus OX=10090 GN=Dync1li2 PE=1 SV=2	5.87	54503.7	311.1	Q6PDL0	4	11.59	0	DC1L2_MOUSE	77.57	89.42	91.77	62.38	70.62	64.85	62.85	82.34	69.21	73.43	58.76	90.16	76.1	72.79		-0.0640346	0.389442	0.407904	0.394672
Kras	GTPase KRas OS=Mus musculus OX=10090 GN=Kras PE=1 SV=1	6.4	21941	1706.26	P32883	7	46.56	0	RASK_MOUSE	127.82	115.72	133.62	108.58	88.04	102.35	109.03	140.15	93.27	106.95	85.09	116.12	112.69	108.43		-0.0600987	0.377786	0.419	0.382536
Slc12a2	Solute carrier family 12 member 2 OS=Mus musculus OX=10090 GN=Slc12a2 PE=1 SV=2	6.98	131832	1591.52	P55012	29	28.55	0	S12A2_MOUSE	2081.94	2641.29	2109.61	1970.39	1474.96	1702.5	1875.27	2287.53	2036.47	1919.55	2163.33	2005.1	1996.78	2047.87		0.0569494	0.377786	0.419	0.382054
Rtn4	Reticulon-4 OS=Mus musculus OX=10090 GN=Rtn4 PE=1 SV=2	4.27	127127	942.86	Q99P72	20	30.64	0	RTN4_MOUSE	1333.52	1527.17	1212.64	793.55	1057.22	1059.32	1193.57	1207.73	1209.26	970.46	927.71	1075.16	1163.9	1097.31		-0.0632192	0.376489	0.420253	0.38176
Llgl1	Lethal(2) giant larvae protein homolog 1 OS=Mus musculus OX=10090 GN=Llgl1 PE=1 SV=1	6.05	113873	222.06	Q80Y17	5	5.6	0	L2GL1_MOUSE	293.76	254.04	271.36	225.32	220.4	232.37	347.86	232.67	166.47	196.74	296.18	224.14	249.54	244.01		-0.068201	0.374188	0.422486	0.380353
Adam22	Disintegrin and metalloproteinase domain-containing protein 22 OS=Mus musculus OX=10090 GN=Adam22 PE=1 SV=2	7.67	102395	642.54	Q9R1V6	18	28.21	0	ADA22_MOUSE	737.25	584.37	722.25	541.92	538.57	577.51	730.11	800.15	461.19	596.54	619.82	673.82	616.98	646.94		0.0593305	0.374846	0.421846	0.379512
Syn1	Synapsin-1 OS=Mus musculus OX=10090 GN=Syn1 PE=1 SV=2	10.35	74268.5	2895.58	O88935	16	39.38	0	SYN1_MOUSE	1196.13	1552.64	912.8	911.63	995.91	877.63	832.56	1062.77	989.47	800.96	1057.66	1376.34	1074.46	1019.96		-0.0673437	0.373173	0.423474	0.379201
Mapk3	Mitogen-activated protein kinase 3 OS=Mus musculus OX=10090 GN=Mapk3 PE=1 SV=5	6.18	43408.7	516.22	Q63844	6	21.58	0	MK03_MOUSE	87.28	72.07	72.68	68.14	68.84	67.64	57.13	90.22	78.13	75.82	57.43	66.57	72.77	70.88		-0.0522344	0.373173	0.423474	0.376811
Fam177a1	Protein FAM177A1 OS=Mus musculus OX=10090 GN=Fam177a1 PE=1 SV=1	4.33	23749.3	1995.46	Q8BR63	5	31.4	0	F177A_MOUSE	202.81	230.21	254.17	205.22	169.6	204.69	218.04	257.97	188.63	200.29	203.82	239.49	211.12	218.04		0.0491809	0.37338	0.423272	0.376605
Cntn2	Contactin-2 OS=Mus musculus OX=10090 GN=Cntn2 PE=1 SV=2	7.44	114016	704.12	Q61330	23	33.08	0	CNTN2_MOUSE	664.16	617.12	567.11	577.57	524.18	561.53	600.28	646.99	482.21	572.9	512.47	601.49	585.28	569.39		-0.0427999	0.373173	0.423474	0.375619
Gnb2	Guanine nucleotide-binding protein G(I)/G(S)/G(T) subunit beta-2 OS=Mus musculus OX=10090 GN=Gnb2 PE=1 SV=3	5.56	38072.5	10442.8	P62880	14	67.06	0	GBB2_MOUSE	2076.25	2240.63	1335.7	2084.38	1627.54	1826.29	1830.16	2923.86	1419.68	1880.56	1143.74	1751.5	1865.13	1824.92		-0.0712976	0.364175	0.432339	0.371089
Crmp1	Dihydropyrimidinase-related protein 1 OS=Mus musculus OX=10090 GN=Crmp1 PE=1 SV=1	6.71	62510	3067.59	P97427	22	60.49	0	DPYL1_MOUSE	682.03	613.47	536.75	515.49	307.63	427.34	352.11	372.83	549.25	500.77	614.17	510.34	513.78	483.25		-0.0712252	0.364175	0.432339	0.371075
Sept8	Septin-8 OS=Mus musculus OX=10090 GN=Sept8 PE=1 SV=4	5.63	50154.6	5840.03	Q8CHH9	19	54.78	0	SEPT8_MOUSE	1617.91	955.69	1846.6	1309.67	1353.89	1305.51	1429.63	1958.16	835.59	1159.48	1334.69	1367.43	1398.21	1347.5		-0.0695146	0.364175	0.432339	0.37075
Nras	GTPase NRas OS=Mus musculus OX=10090 GN=Nras PE=1 SV=1	4.82	21484.3	902.88	P08556	7	48.15	0	RASN_MOUSE	42.97	43.1	43.95	36.7	31	37.71	47.19	50.31	37.01	41.2	38.9	30.84	39.24	40.91		0.0524304	0.366363	0.430167	0.370095
Tst	Thiosulfate sulfurtransferase OS=Mus musculus OX=10090 GN=Tst PE=1 SV=3	7.85	33694.1	688.22	P52196	9	37.37	0	THTR_MOUSE	152.75	114.69	110.08	83.98	80.17	100.67	114.12	103.68	88.02	112.01	122.76	115.27	107.05	109.31		0.0561212	0.364175	0.432339	0.368474
Pfkl	ATP-dependent 6-phosphofructokinase_ liver type OS=Mus musculus OX=10090 GN=Pfkl PE=1 SV=4	6.78	86158.4	252.36	P12382	4	6.79	0	PFKAL_MOUSE	185.77	176.35	153.93	106.92	166.22	165.66	174.38	169.78	144.13	137.91	165.71	188.98	159.14	163.48		0.0519681	0.364175	0.432339	0.367865
Lap3	Cytosol aminopeptidase OS=Mus musculus OX=10090 GN=Lap3 PE=1 SV=3	7.64	56540.6	524.9	Q9CPY7	12	30.83	0	AMPL_MOUSE	181.71	168.28	182.19	165.52	103.81	147.91	151.95	167.37	148.25	164.22	134.42	137.35	158.24	150.59		-0.0514519	0.364175	0.432339	0.367792
Sccpdh	Saccharopine dehydrogenase-like oxidoreductase OS=Mus musculus OX=10090 GN=Sccpdh PE=1 SV=1	8.7	47699.7	858.1	Q8R127	9	29.14	0	SCPDL_MOUSE	193.61	167.61	172.32	117.81	144.35	159.64	173.94	212.16	151.62	136.52	151.22	161.9	159.22	164.56		0.0501433	0.364175	0.432339	0.367611
Igsf8	Immunoglobulin superfamily member 8 OS=Mus musculus OX=10090 GN=Igsf8 PE=1 SV=2	7.9	65638.3	5240.71	Q8R366	14	37.81	0	IGSF8_MOUSE	2004.12	1335.55	1573.99	1561.3	2003.74	1902.76	1913.27	2245.28	1581.48	1663.99	1589.01	1717.55	1730.24	1785.1		0.0498287	0.364175	0.432339	0.367568
Rap2b	Ras-related protein Rap-2b OS=Mus musculus OX=10090 GN=Rap2b PE=1 SV=1	4.53	20732.5	1365.61	P61226	5	31.69	0	RAP2B_MOUSE	42.63	41.72	44.65	31.7	30.46	34.52	32.28	43.19	35.81	30.99	35.71	39.3	37.61	36.21		-0.0476232	0.364175	0.432339	0.367276
Kcnab2	Voltage-gated potassium channel subunit beta-2 OS=Mus musculus OX=10090 GN=Kcnab2 PE=1 SV=1	9.31	41306.5	2102.28	P62482	13	45.5	0	KCAB2_MOUSE	539.47	478.39	508.74	384.21	426.33	455.78	556.87	589.45	444.81	461.84	413.86	423.53	465.49	481.72		0.0450063	0.364175	0.432339	0.366946
Clec2l	C-type lectin domain family 2 member L OS=Mus musculus OX=10090 GN=Clec2l PE=1 SV=1	6.98	24109.4	467.54	P0C7M9	6	33.18	0	CLC2L_MOUSE	87.9	83.09	90.04	66.62	68.45	74.16	86.26	96.78	70.35	78.62	68.39	84.76	78.38	80.86		0.0445442	0.364175	0.432339	0.366889
Prrt2	Proline-rich transmembrane protein 2 OS=Mus musculus OX=10090 GN=Prrt2 PE=1 SV=1	4.39	36094.9	310.86	E9PUL5	2	20.23	0	PRRT2_MOUSE	71.89	73.69	80.01	70.43	53.3	64.77	82.04	69.41	NA	57.09	78.03	NA	69.01	71.64		0.0516692	0.361769	0.434742	0.36544
Omg	Oligodendrocyte-myelin glycoprotein OS=Mus musculus OX=10090 GN=Omg PE=1 SV=1	8.45	49739.9	777.33	Q63912	6	16.59	0	OMGP_MOUSE	251.34	254.36	325.81	272.21	222.11	249.96	325.45	357.79	224.91	243.58	235.67	255.91	262.63	273.89		0.0482437	0.361769	0.434742	0.364971
Hsd17b12	Very-long-chain 3-oxoacyl-CoA reductase OS=Mus musculus OX=10090 GN=Hsd17b12 PE=1 SV=1	10	34970	293.29	O70503	2	9.94	0	DHB12_MOUSE	61.98	54.31	58.75	45.41	46.65	55.35	47.6	60.64	42.51	56.78	47.43	59.61	53.74	52.43		-0.0392182	0.348545	0.448183	0.350744
Sptan1	Spectrin alpha chain_ non-erythrocytic 1 OS=Mus musculus OX=10090 GN=Sptan1 PE=1 SV=4	5.04	285396	795.38	P16546	97	49.39	0	SPTN1_MOUSE	6226.47	7123.24	4440.3	5297.83	3122.75	4981.85	7770.53	9291.7	3192.82	3703.62	2854.92	4762.36	5198.74	5262.66		-0.0806093	0.339379	0.457743	0.348821
Hcn2	Potassium/sodium hyperpolarization-activated cyclic nucleotide-gated channel 2 OS=Mus musculus OX=10090 GN=Hcn2 PE=1 SV=1	8.8	95577.5	336.86	O88703	8	13.44	0	HCN2_MOUSE	421.21	374.83	446.27	271.92	314.94	384.76	420.37	481.56	252.29	365.81	260.9	381.91	368.99	360.47		-0.0531048	0.3446	0.452272	0.348668
Cntnap1	Contactin-associated protein 1 OS=Mus musculus OX=10090 GN=Cntnap1 PE=1 SV=2	6.65	158308	1063.5	O54991	31	28.23	0	CNTP1_MOUSE	1795.64	1457.34	1633.91	1323.78	1329.74	1599.11	1591.41	2044.63	1467.01	1438.24	1363	1505.59	1523.25	1568.31		0.037867	0.346219	0.450589	0.348284
Pygb	Glycogen phosphorylase_ brain form OS=Mus musculus OX=10090 GN=Pygb PE=1 SV=3	6.31	97414.4	196.6	Q8CI94	3	5.81	0	PYGB_MOUSE	3387.17	6392.58	14506.1	31448.8	117.57	1553.25	4349.54	3425.4	2877.62	2389.28	3993.96	2337.7	9567.58	3228.92		-0.152564	0.311888	0.487654	0.347203
Aldoc	Fructose-bisphosphate aldolase C OS=Mus musculus OX=10090 GN=Aldoc PE=1 SV=4	6.77	39794.1	1231.62	P05063	10	35.54	0	ALDOC_MOUSE	235.65	199.47	186.19	182.27	151.96	181.13	198.79	218.85	161.38	168.85	171.17	185.75	189.44	184.13		-0.0367006	0.34509	0.451763	0.347036
Cct2	T-complex protein 1 subunit beta OS=Mus musculus OX=10090 GN=Cct2 PE=1 SV=4	5.98	57819.5	228.35	P80314	4	10.28	0	TCPB_MOUSE	90.09	86.54	123.34	105.62	74.24	69.07	88.92	111.39	85.31	86.08	77.04	77.65	91.48	87.73		-0.0432213	0.341347	0.455673	0.344072
Aldoa	Fructose-bisphosphate aldolase A OS=Mus musculus OX=10090 GN=Aldoa PE=1 SV=2	8.07	39812.2	4968.63	P05064	24	84.07	0	ALDOA_MOUSE	1011.3	1018.76	883.92	875.97	702.7	721.17	978.95	1130.89	798.71	807.03	688.22	691.43	868.97	849.2		-0.0419263	0.339779	0.457321	0.342356
Atp1a4	Sodium/potassium-transporting ATPase subunit alpha-4 OS=Mus musculus OX=10090 GN=Atp1a4 PE=1 SV=3	5.38	116085	3691.09	Q9WV27	12	11.43	0	AT1A4_MOUSE	886.71	927.84	725.33	782.34	786.79	688.64	757.92	908.13	784.85	818.76	737.21	878.93	799.61	814.3		0.0300209	0.339779	0.457321	0.341102
Ncam1	Neural cell adhesion molecule 1 OS=Mus musculus OX=10090 GN=Ncam1 PE=1 SV=3	4.54	120226	1802.34	P13595	24	28.7	0	NCAM1_MOUSE	2404.02	3251.45	2675.24	2325.93	3228.74	3737.65	2517.18	3791.56	2316.24	3097.32	3071.71	3319	2937.17	3018.83		0.0416808	0.338157	0.459032	0.340716
Tkt	Transketolase OS=Mus musculus OX=10090 GN=Tkt PE=1 SV=1	7.25	68314.9	5196.46	P40142	27	61.16	0	TKT_MOUSE	3352.85	3987.94	3045.77	2641.51	1963.78	2369.21	2771.98	3185.06	2456.15	2629.87	2473.21	2981.12	2893.51	2749.56		-0.0418957	0.335961	0.461359	0.338564
Trap1	Heat shock protein 75 kDa_ mitochondrial OS=Mus musculus OX=10090 GN=Trap1 PE=1 SV=1	6.27	80551.3	1333.31	Q9CQN1	2	3.26	0	TRAP1_MOUSE	398.27	179.86	308.5	213.19	183.87	483.28	307.88	329.94	372.61	247.85	202.84	NA	294.5	292.22		0.0628134	0.330107	0.46762	0.33603
Rab1b	Ras-related protein Rab-1B OS=Mus musculus OX=10090 GN=Rab1b PE=1 SV=1	5.4	22358.3	4037.54	Q9D1G1	10	59.2	0	RAB1B_MOUSE	370.76	436.02	449.47	502.81	197.88	283.17	487.09	494.7	355.57	303.02	335.03	295.36	373.35	378.46		0.0546069	0.330778	0.466898	0.335255
Dpysl2	Dihydropyrimidinase-related protein 2 OS=Mus musculus OX=10090 GN=Dpysl2 PE=1 SV=2	5.95	62676.9	9317.52	O08553	27	68.71	0	DPYL2_MOUSE	4235.56	5257.25	4604.55	4541.41	3044.87	3473.46	3289.73	4055.28	4570.39	3987.61	4201.92	4159.15	4192.85	4044.01		-0.0354777	0.332493	0.465058	0.334381
Nptn	Neuroplastin OS=Mus musculus OX=10090 GN=Nptn PE=1 SV=3	7.67	44715.3	280.08	P97300	4	8.56	0	NPTN_MOUSE	222.37	183.09	240.69	190.35	152.2	162.87	208.82	227.67	192.25	207.62	87.89	223.79	191.93	191.34		-0.0514976	0.330337	0.467373	0.334327
Ncald	Neurocalcin-delta OS=Mus musculus OX=10090 GN=Ncald PE=1 SV=4	5.05	22359.3	490.6	Q91X97	5	26.42	0	NCALD_MOUSE	76.49	61.36	42.11	34.8	35.3	37.73	45.89	50.92	38.54	38.2	53.74	60.49	47.96	47.96		0.0479724	0.330298	0.467414	0.333764
Gapdh	Glyceraldehyde-3-phosphate dehydrogenase OS=Mus musculus OX=10090 GN=Gapdh PE=1 SV=2	8.36	36095.2	7356.25	P16858	13	52.55	0	G3P_MOUSE	5546.63	5690.53	5074.73	4214.42	3588.14	3586.36	4950.04	5104.6	4602.14	4409.73	3925.57	4976.01	4616.8	4661.35		0.0342548	0.330778	0.466898	0.332547
Aldh5a1	Succinate-semialdehyde dehydrogenase_ mitochondrial OS=Mus musculus OX=10090 GN=Aldh5a1 PE=1 SV=1	8.26	56538.6	2358.72	Q8BWF0	18	47.99	0	SSDH_MOUSE	1285.55	983.05	874.82	755.78	771.38	769.52	800.1	803.98	715.84	910.72	998.1	1023.29	906.68	875.34		-0.0352699	0.330337	0.467373	0.332214
Ppib	Peptidyl-prolyl cis-trans isomerase B OS=Mus musculus OX=10090 GN=Ppib PE=1 SV=2	10.24	23713.5	663.2	P24369	3	16.2	0	PPIB_MOUSE	46.86	46.55	40.99	37.15	39.67	38.65	49.67	49.05	36.35	42.35	36.82	41.49	41.64	42.62		0.0283182	0.330778	0.466898	0.331988
Sypl1	Synaptophysin-like protein 1 OS=Mus musculus OX=10090 GN=Sypl1 PE=1 SV=2	8.95	29241.6	945.65	O09117	4	20.31	0	SYPL1_MOUSE	321.12	363.04	294.09	80.29	290.36	326.03	422.49	366.92	97.04	456.75	68.92	372.93	279.15	297.51		-0.09355	0.318431	0.480363	0.331888
Vcp	Transitional endoplasmic reticulum ATPase OS=Mus musculus OX=10090 GN=Vcp PE=1 SV=4	4.96	90006.3	889.52	Q01853	16	30.65	0	TERA_MOUSE	380.13	318.9	302.85	274.39	246.7	306.04	353.52	361.48	290.71	293.64	256.04	305.11	304.83	310.08		0.0273549	0.324302	0.473913	0.325453
Stxbp1	Syntaxin-binding protein 1 OS=Mus musculus OX=10090 GN=Stxbp1 PE=1 SV=2	6.54	67968.1	6333.98	O08599	32	59.26	0	STXB1_MOUSE	2674.78	2353.15	2314.33	2049.34	1806.73	2308.11	2591.04	2774.18	1673.81	2038.89	2312.89	2475	2251.07	2310.97		0.0289629	0.321796	0.476655	0.323097
Hepacam	Hepatocyte cell adhesion molecule OS=Mus musculus OX=10090 GN=Hepacam PE=1 SV=2	9.88	46595	887.31	Q640R3	10	34.45	0	HECAM_MOUSE	410.02	350.43	621.68	475.13	358.41	391.4	444.86	520.45	384.22	390.26	370.3	408.86	434.51	419.83		-0.0299648	0.320495	0.478085	0.321893
Dpysl5	Dihydropyrimidinase-related protein 5 OS=Mus musculus OX=10090 GN=Dpysl5 PE=1 SV=1	6.68	62086.8	830.39	Q9EQF6	17	49.82	0	DPYL5_MOUSE	407.04	530.28	472.75	465.18	232.83	229.56	224.6	238.75	416.76	442.43	421.87	500.69	389.61	374.18		-0.0467831	0.317353	0.481556	0.320783
Prdx2	Peroxiredoxin-2 OS=Mus musculus OX=10090 GN=Prdx2 PE=1 SV=3	5.04	21949.8	2496.56	Q61171	9	55.05	0	PRDX2_MOUSE	192.44	203.64	218.17	203.86	137.72	142.79	176.82	185.91	150.49	171.39	187.82	243	183.1	185.91		0.0291749	0.319072	0.479653	0.320403
Rap1a	Ras-related protein Rap-1A OS=Mus musculus OX=10090 GN=Rap1a PE=1 SV=1	6.53	21329.4	13904.7	P62835	11	72.83	0	RAP1A_MOUSE	832.57	856.67	803.17	816.09	822.24	620.67	832.42	874.33	722.07	850.63	737.18	789.96	791.9	801.1		0.020971	0.319072	0.479653	0.319761
Sept7	Septin-7 OS=Mus musculus OX=10090 GN=Sept7 PE=1 SV=1	8.83	50892.1	6162.81	O55131	19	53.67	0	SEPT7_MOUSE	1953.11	1595.38	1806.42	1227.57	1572.05	1364.93	1496.69	2153.39	1240.03	1541.22	1395.41	1537.82	1586.58	1560.76		-0.0276129	0.318431	0.480363	0.319626
Sod2	Superoxide dismutase [Mn]_ mitochondrial OS=Mus musculus OX=10090 GN=Sod2 PE=1 SV=3	8.84	24831.1	4679.6	P09671	9	51.35	0	SODM_MOUSE	488.38	529.4	418.86	396.86	415.37	536.07	437.68	507.47	447.08	524.83	314.19	523.22	464.16	459.08		-0.026607	0.318431	0.480363	0.31954
Vamp3	Vesicle-associated membrane protein 3 OS=Mus musculus OX=10090 GN=Vamp3 PE=1 SV=1	8.86	11594.3	2533.88	P63024	4	56.31	0	VAMP3_MOUSE	91.82	80.18	81.22	63.3	74.48	75.52	79.1	89.89	67.93	59.38	84.79	97.55	77.75	79.78		0.0260162	0.318431	0.480363	0.319492
Sirt2	NAD-dependent protein deacetylase sirtuin-2 OS=Mus musculus OX=10090 GN=Sirt2 PE=1 SV=2	5.06	43883.7	18721.6	Q8VDQ8	23	70.18	0	SIR2_MOUSE	11634	12311.2	12029.6	9118.18	10455	10914.6	11669.9	13379.5	9478.93	10289.1	10030.2	12843.4	11077.1	11281.8		0.0216549	0.3176	0.481282	0.318337
Fabp5	Fatty acid-binding protein 5 OS=Mus musculus OX=10090 GN=Fabp5 PE=1 SV=3	6.16	15479.6	2117.89	Q05816	7	71.85	0	FABP5_MOUSE	34.23	38.96	52.22	75.6	43.61	40.41	60.88	71.32	36.5	48.25	28.96	49.12	47.51	49.17		0.0382429	0.314873	0.484315	0.317186
Cntn1	Contactin-1 OS=Mus musculus OX=10090 GN=Cntn1 PE=1 SV=1	5.76	114244	2266.83	P12960	37	49.9	0	CNTN1_MOUSE	1982.11	1811.26	1801.65	1574.95	1760.55	1728.05	1739.82	2665.48	1550.97	1615.43	1554.5	1890.34	1776.43	1836.09		0.023282	0.316025	0.48303	0.316882
Slc44a1	Choline transporter-like protein 1 OS=Mus musculus OX=10090 GN=Slc44a1 PE=1 SV=3	8.74	74606.9	3633.36	Q6X893	18	28.18	0	CTL1_MOUSE	2736.96	1528.75	2118.13	1849.85	1525.57	1660.01	2146.48	2801.84	1662.29	1978.21	1420.3	1662.84	1903.21	1945.33		0.0283156	0.311888	0.487654	0.313171
Fkbp1a	Peptidyl-prolyl cis-trans isomerase FKBP1A OS=Mus musculus OX=10090 GN=Fkbp1a PE=1 SV=2	8.61	11979.7	1251.16	P26883	2	25	0	FKB1A_MOUSE	14.55	23.22	24.83	NA	30.15	25.25	26.08	27.85	15.11	23.82	22.81	21.79	23.6	22.91		-0.0291107	0.310484	0.489233	0.311846
Lsamp	Limbic system-associated membrane protein OS=Mus musculus OX=10090 GN=Lsamp PE=1 SV=1	6.24	38485.4	3051.88	Q8BLK3	10	31.38	0	LSAMP_MOUSE	385.73	360.63	387.58	282.65	298.77	319.39	319.09	357.99	310.67	324.09	305.21	386.42	339.13	333.91		-0.016724	0.310484	0.489233	0.310934
Gpm6b	Neuronal membrane glycoprotein M6-b OS=Mus musculus OX=10090 GN=Gpm6b PE=1 SV=2	5.75	37008.2	1469.47	P35803	5	17.99	0	GPM6B_MOUSE	971.49	217.2	909.13	81.58	740.39	773.08	609.89	722.88	530.51	147.12	412.22	484.16	615.48	484.46		-0.0638872	0.303141	0.497575	0.3098
Pacsin1	Protein kinase C and casein kinase substrate in neurons protein 1 OS=Mus musculus OX=10090 GN=Pacsin1 PE=1 SV=1	4.97	50917.5	1529.95	Q61644	14	40.36	0	PACN1_MOUSE	373.06	375.4	300.4	296.54	220.13	291.99	236.88	277.15	270.24	277.03	334.12	444.36	309.58	306.63		-0.0226701	0.308	0.49204	0.308833
Actr1a	Alpha-centractin OS=Mus musculus OX=10090 GN=Actr1a PE=1 SV=1	6.22	42727.9	430.14	P61164	6	23.94	0	ACTZ_MOUSE	202.85	154.17	173.89	143	144.15	158.32	145.64	194.09	150.8	167.31	162.26	163.69	162.73	163.97		0.015671	0.308	0.49204	0.308398
Sfxn1	Sideroflexin-1 OS=Mus musculus OX=10090 GN=Sfxn1 PE=1 SV=3	9.6	35934.6	356.24	Q99JR1	2	9.63	0	SFXN1_MOUSE	NA	51.11	40.04	9.43	NA	39.18	51.51	15.38	9.03	47.07	37.41	64.91	34.94	37.55		0.0524394	0.301332	0.499652	0.305861
Sptbn1	Spectrin beta chain_ non-erythrocytic 1 OS=Mus musculus OX=10090 GN=Sptbn1 PE=1 SV=2	5.27	275079	887.04	Q62261	88	49.43	0	SPTB2_MOUSE	11509.6	9080.18	5317.43	6080.99	2354.29	9344.52	2915.29	13090	3485.4	8088.94	5755.31	10035.8	7281.18	7228.45		-0.0431104	0.301899	0.499001	0.304961
Sirpa	Tyrosine-protein phosphatase non-receptor type substrate 1 OS=Mus musculus OX=10090 GN=Sirpa PE=1 SV=1	8.12	56995.2	191.85	P97797	2	6.04	0	SHPS1_MOUSE	75.54	59.51	77.95	92.27	NA	56.93	NA	72.39	NA	57.35	77.17	85.19	72.44	73.03		0.0199825	0.303141	0.497575	0.303799
Slc6a9	Sodium- and chloride-dependent glycine transporter 1 OS=Mus musculus OX=10090 GN=Slc6a9 PE=1 SV=3	7.68	77513.8	450.21	P28571	5	8.96	0	SC6A9_MOUSE	468.59	405.55	498.61	336.76	391.76	387.8	398.51	547.51	377.32	362.08	379.02	456.14	414.84	420.1		0.0147046	0.303141	0.497575	0.303497
Hagh	Hydroxyacylglutathione hydrolase_ mitochondrial OS=Mus musculus OX=10090 GN=Hagh PE=1 SV=2	7.62	34540.4	465.46	Q99KB8	4	15.21	0	GLO2_MOUSE	86.58	87.22	107.81	95.51	80.91	99.14	104.29	117.53	70.4	89.8	81.65	104.75	92.86	94.74		0.0145932	0.303141	0.497575	0.303492
Lgi1	Leucine-rich glioma-inactivated protein 1 OS=Mus musculus OX=10090 GN=Lgi1 PE=1 SV=1	7.96	64385.2	277.95	Q9JIA1	5	9.34	0	LGI1_MOUSE	147.33	122.3	141.14	130.8	121.42	123.45	136.01	155.36	117.26	130.28	97.71	149.4	131.07	131		-0.0135809	0.303141	0.497575	0.303445
Map1a	Microtubule-associated protein 1A OS=Mus musculus OX=10090 GN=Map1a PE=1 SV=2	4.73	301509	179.53	Q9QYR6	14	7.67	0	MAP1A_MOUSE	791.07	746.96	807.09	798.18	673.09	791.83	697.01	901.51	676.48	724.14	895.85	697.38	768.04	765.4		-0.0128715	0.303141	0.497575	0.303414
Tspan2	Tetraspanin-2 OS=Mus musculus OX=10090 GN=Tspan2 PE=1 SV=1	7.89	24808.9	6745.66	Q922J6	4	16.74	0	TSN2_MOUSE	2837.6	2868.06	1370.72	1235.33	1286.84	2331.18	2147.75	2378.06	1566.39	1536.01	1417.2	2147.79	1988.29	1865.53		-0.0240552	0.301412	0.49956	0.302371
Gsn	Gelsolin OS=Mus musculus OX=10090 GN=Gsn PE=1 SV=3	5.78	86340.9	940.02	P13020	19	31.28	0	GELS_MOUSE	906.64	523.69	893.27	586.95	712.15	818.95	976.42	946.3	716.92	789.27	465.07	551.23	740.27	740.87		-0.0192167	0.301412	0.49956	0.302024
Ywhaq	14-3-3 protein theta OS=Mus musculus OX=10090 GN=Ywhaq PE=1 SV=1	4.49	28063.5	6777.57	P68254	12	50.61	0	1433T_MOUSE	434.53	422.62	390.56	275.77	427.46	483.35	279.99	441.44	370.83	410.38	434.53	534.25	405.72	411.9		0.0159329	0.301412	0.49956	0.301833
Pafah1b1	Platelet-activating factor acetylhydrolase IB subunit alpha OS=Mus musculus OX=10090 GN=Pafah1b1 PE=1 SV=2	7.04	47240.4	316.2	P63005	4	12.93	0	LIS1_MOUSE	103.75	108.74	100.18	80.62	93.96	100.45	106.5	128.34	80.75	90.41	67.69	120.23	97.95	98.99		-0.0137784	0.301332	0.499652	0.301647
Myo1d	Unconventional myosin-Id OS=Mus musculus OX=10090 GN=Myo1d PE=1 SV=1	9.87	116880	2226.27	Q5SYD0	51	55.57	0	MYO1D_MOUSE	1671.63	1701.44	1315.78	1291.34	1259.47	1174.45	1458.72	1710.03	1200.88	1225.65	1168.06	1584.21	1402.35	1391.26		-0.0122266	0.301332	0.499652	0.30158
Gng3	Guanine nucleotide-binding protein G(I)/G(S)/G(O) subunit gamma-3 OS=Mus musculus OX=10090 GN=Gng3 PE=1 SV=1	7.83	8532.89	2211.13	P63216	3	69.33	0	GBG3_MOUSE	46.81	38.45	47.26	33.41	20.75	30.85	27.12	36.45	37.93	33.23	35.87	38.13	36.26	34.79		-0.0157126	0.30113	0.499885	0.30154
Daam2	Disheveled-associated activator of morphogenesis 2 OS=Mus musculus OX=10090 GN=Daam2 PE=1 SV=4	6.5	129168	250.62	Q80U19	7	8.97	0	DAAM2_MOUSE	336.64	289.3	279.61	252.66	201.02	239.21	297.08	343.59	227.83	219.7	250.05	246.49	266.41	264.12		-0.0118708	0.300533	0.500572	0.300768
Bphl	Valacyclovir hydrolase OS=Mus musculus OX=10090 GN=Bphl PE=1 SV=1	9.27	33079.1	571.51	Q8R164	9	42.61	0	BPHL_MOUSE	101.05	102.19	99.63	84.33	62.87	84.02	81.97	90.95	77.25	90.79	89.4	93.99	89.02	87.39		-0.0101484	0.300533	0.500572	0.300705
Eno3	Beta-enolase OS=Mus musculus OX=10090 GN=Eno3 PE=1 SV=3	6.84	47367.1	5089.5	P21550	8	27.19	0	ENOB_MOUSE	136.3	203.94	126.14	136.94	97.4	95.41	62.87	115.81	133.61	177.19	163.7	169.66	132.69	137.14		0.0169206	0.297725	0.50382	0.298205
Hist1h4a	Histone H4 OS=Mus musculus OX=10090 GN=Hist1h4a PE=1 SV=2	11.89	11367.4	1443.48	P62806	5	50.49	0	H4_MOUSE	20.09	17.1	32.5	29.52	20.07	18.77	20.56	26.78	15.38	15.81	27.27	36.14	23.01	23.66		0.0146208	0.297725	0.50382	0.298083
Dpysl3	Dihydropyrimidinase-related protein 3 OS=Mus musculus OX=10090 GN=Dpysl3 PE=1 SV=1	6.06	62335.6	1707.5	Q62188	11	28.6	0	DPYL3_MOUSE	145.37	135.42	124.36	108.1	95.91	95.3	104.39	118.73	113.54	104.95	133.06	127.29	117.41	117		0.00806769	0.297725	0.50382	0.297834
Macrod1	O-acetyl-ADP-ribose deacetylase MACROD1 OS=Mus musculus OX=10090 GN=Macrod1 PE=1 SV=2	9.03	35865	941.71	Q922B1	4	17.96	0	MACD1_MOUSE	167.1	139.72	163.31	165.99	139.67	153.97	146.44	141.35	121.97	154.35	171.88	196.67	154.96	155.44		-0.00785654	0.297725	0.50382	0.297828
Dusp15	Dual specificity protein phosphatase 15 OS=Mus musculus OX=10090 GN=Dusp15 PE=1 SV=3	9.66	26642.5	1491.26	Q8R4V2	10	52.34	0	DUS15_MOUSE	216.21	171	215.81	195.01	174.49	182.99	208.04	251.88	143.26	205.8	179.85	184.42	192.59	195.54		0.00743618	0.296259	0.505523	0.296352
Ly6h	Lymphocyte antigen 6H OS=Mus musculus OX=10090 GN=Ly6h PE=1 SV=2	7.4	15296.4	1378.3	Q9WUC3	4	28.06	0	LY6H_MOUSE	76.53	64.14	84.01	67.69	61.83	55.47	70.21	86.07	55.34	59.02	63.96	73.58	68.28	68.03		-0.00726185	0.296259	0.505523	0.296348
Kcna2	Potassium voltage-gated channel subfamily A member 2 OS=Mus musculus OX=10090 GN=Kcna2 PE=1 SV=1	4.58	57157.1	1484.46	P63141	13	35.67	0	KCNA2_MOUSE	612.05	593.12	700.22	471.9	417.72	545.94	644.52	670.44	491.66	411.25	528.57	606.61	556.82	558.84		0.00572204	0.291267	0.511368	0.291323
Arf4	ADP-ribosylation factor 4 OS=Mus musculus OX=10090 GN=Arf4 PE=1 SV=2	7.05	20510.7	3046.68	P61750	9	57.78	0	ARF4_MOUSE	79	66.22	69.33	71.26	82.72	69.82	89.7	107.82	77.35	50.94	44.21	90.97	73.06	76.83		0.00634271	0.291068	0.511602	0.291137
Shisa4	Protein shisa-4 OS=Mus musculus OX=10090 GN=Shisa4 PE=1 SV=1	7.29	22224.5	320.79	Q8CA71	2	8.63	0	SHSA4_MOUSE	NA	28.68	31.03	26.98	22.68	NA	28.32	29.87	NA	26.74	23.75	NA	27.34	27.17		-0.00489356	0.291068	0.511602	0.291109
Canx	Calnexin OS=Mus musculus OX=10090 GN=Canx PE=1 SV=1	4.3	67677.2	502.81	P35564	11	25.21	0	CALX_MOUSE	46212.5	29268.6	30732.8	24482.6	19727.7	28543.7	43164.2	30053.5	31201.1	42553.3	17137.2	19877.2	29828	30664.4		0.00565117	0.290225	0.512596	0.29028
Dpysl4	Dihydropyrimidinase-related protein 4 OS=Mus musculus OX=10090 GN=Dpysl4 PE=1 SV=1	6.56	62531.9	733.28	O35098	12	35.14	0	DPYL4_MOUSE	232.72	229.48	204.22	187.78	129.54	146.09	121.25	156.15	182.04	204.65	219.48	255.76	188.31	189.89		0.00513755	0.290225	0.512596	0.29027
Phyhip	Phytanoyl-CoA hydroxylase-interacting protein OS=Mus musculus OX=10090 GN=Phyhip PE=1 SV=1	6.59	38124.9	347.94	Q8K0S0	4	12.73	0	PHYIP_MOUSE	79.7	101.18	101.58	82.14	66.66	73.75	59.87	83.57	88.9	88.61	87.29	97.57	84.17	84.3		0.00353327	0.290225	0.512596	0.290246
Ppp1cb	Serine/threonine-protein phosphatase PP1-beta catalytic subunit OS=Mus musculus OX=10090 GN=Ppp1cb PE=1 SV=3	5.79	37985.3	695.81	P62141	9	34.86	0	PP1B_MOUSE	158.02	183.87	157.31	155.68	127.55	159.23	146.56	204.86	137.26	123.84	160.9	177.99	156.94	158.57		0.00271942	0.29018	0.512648	0.290193
Cd59a	CD59A glycoprotein OS=Mus musculus OX=10090 GN=Cd59a PE=2 SV=1	7.34	14332.4	1094.96	O55186	2	21.14	0	CD59A_MOUSE	52.9	86	86.08	80.3	70.51	84.75	92.02	80.65	51.23	78.34	73.37	86.97	76.76	77.1		0.00272407	0.28981	0.513086	0.289823
Rala	Ras-related protein Ral-A OS=Mus musculus OX=10090 GN=Rala PE=1 SV=1	7	23723.9	3923.3	P63321	7	43.2	0	RALA_MOUSE	315.59	230.46	302.29	242.85	260.08	292.24	314.25	342.06	225.56	268.26	211.58	294.58	273.92	276.05		-0.000251271	0.285412	0.518309	0.285412
Ap2a2	AP-2 complex subunit alpha-2 OS=Mus musculus OX=10090 GN=Ap2a2 PE=1 SV=2	6.53	104929	227.31	P17427	7	9.59	0	AP2A2_MOUSE	171.4	222.49	175.95	182.7	152.06	160.23	NA	NA	NA	NA	NA	NA	177.47	0		NA	NA	NA	0
Chmp4b	Charged multivesicular body protein 4b OS=Mus musculus OX=10090 GN=Chmp4b PE=1 SV=2	4.57	24936.2	328.69	Q9D8B3	2	13.39	0	CHM4B_MOUSE	NA	NA	NA	NA	NA	NA	69.5	97.31	69.23	75.74	74.54	92.89	0	79.87		NA	NA	NA	0
Dnaja1	DnaJ homolog subfamily A member 1 OS=Mus musculus OX=10090 GN=Dnaja1 PE=1 SV=1	6.7	45609.6	224.35	P63037	2	9.57	0	DNJA1_MOUSE	NA	NA	NA	NA	NA	NA	59.63	66.05	59.07	74.4	67.38	62.74	0	64.88		NA	NA	NA	0
Fbxo2	F-box only protein 2 OS=Mus musculus OX=10090 GN=Fbxo2 PE=1 SV=1	4.01	33961.1	242.78	Q80UW2	2	9.09	0	FBX2_MOUSE	NA	NA	NA	NA	NA	NA	42.73	46.69	NA	32.01	NA	NA	0	40.48		NA	NA	NA	0
Gfap	Glial fibrillary acidic protein OS=Mus musculus OX=10090 GN=Gfap PE=1 SV=4	5.1	49957.2	801.21	P03995	10	24.42	0	GFAP_MOUSE	106	130.25	80.28	71.61	63.38	71.54	NA	NA	NA	NA	NA	NA	87.18	0		NA	NA	NA	0
Nme3	Nucleoside diphosphate kinase 3 OS=Mus musculus OX=10090 GN=Nme3 PE=1 SV=3	6.27	19270.2	766.04	Q9WV85	2	18.34	0	NDK3_MOUSE	66.69	65.55	57.54	NA	48.2	57.35	NA	NA	NA	NA	NA	NA	59.07	0		NA	NA	NA	0
Phyhipl	Phytanoyl-CoA hydroxylase-interacting protein-like OS=Mus musculus OX=10090 GN=Phyhipl PE=1 SV=1	5.93	42911.2	204.5	Q8BGT8	2	5.6	0	PHIPL_MOUSE	NA	NA	NA	NA	NA	NA	17.09	21.22	22.87	37.8	20.43	27.3	0	24.45		NA	NA	NA	0
Pkp1	Plakophilin-1 OS=Mus musculus OX=10090 GN=Pkp1 PE=1 SV=1	9.01	82322	377.97	P97350	3	3.98	0	PKP1_MOUSE	NA	NA	NA	372.99	NA	NA	NA	NA	NA	NA	NA	NA	372.99	0		NA	NA	NA	0
Ppp1r14a	Protein phosphatase 1 regulatory subunit 14A OS=Mus musculus OX=10090 GN=Ppp1r14a PE=1 SV=1	7.19	16819.9	477.45	Q91VC7	2	14.97	0	PP14A_MOUSE	48.99	37.65	48.86	35.6	27.74	25.1	NA	NA	NA	NA	NA	NA	37.33	0		NA	NA	NA	0
Rab3d	Ras-related protein Rab-3D OS=Mus musculus OX=10090 GN=Rab3d PE=1 SV=1	4.57	24644.5	5300.22	P35276	6	32.88	0	RAB3D_MOUSE	NA	NA	NA	NA	NA	NA	9.36	20.81	7.86	9.99	9.77	22.15	0	13.32		NA	NA	NA	0
Ppp1cc	Serine/threonine-protein phosphatase PP1-gamma catalytic subunit OS=Mus musculus OX=10090 GN=Ppp1cc PE=1 SV=1	6.13	37725.2	623.54	P63087	9	35.29	0	PP1G_MOUSE	33.75	47.28	46.37	35.65	33.24	38.28	NA	NA	NA	NA	NA	NA	39.09	0		NA	NA	NA	0
Sord	Sorbitol dehydrogenase OS=Mus musculus OX=10090 GN=Sord PE=1 SV=3	6.62	38819.8	310.2	Q64442	2	7.28	0	DHSO_MOUSE	82.28	71	79.57	72.07	46.93	42.5	NA	NA	NA	NA	NA	NA	65.72	0		NA	NA	NA	0
Tjp2	Tight junction protein ZO-2 OS=Mus musculus OX=10090 GN=Tjp2 PE=1 SV=2	6.37	131508	153.32	Q9Z0U1	2	1.71	0	ZO2_MOUSE	251.09	175.21	NA	NA	155.72	180.1	NA	NA	NA	NA	NA	NA	190.53	0		NA	NA	NA	0
